# Supplementary material for: NbCl5-catalyzed sulfa-Michael addition for constructing quaternary centers in enones
Source: Royal Society of Chemistry journal article supplement (doi:10.1039/d3ob00911d), 2023-01-01

## Supporting Information

### **NbCl<sub>5</sub>-catalyzed sulfa-Michael addition to constructing quaternary centers on enones**

Mingxia Ye<sup>a</sup>, Yingying Xu<sup>a</sup>, Tianhang Song<sup>\*b</sup> and Zhenbo Gao<sup>\*a</sup>

<sup>a</sup> Jiangsu Key Laboratory of Pesticide Science and Department of Chemistry, College of Sciences, Nanjing Agricultural University, Nanjing, Jiangsu, China

E-mail: [zgao@njau.edu.cn](mailto:zgao@njau.edu.cn)

<sup>b</sup> Shijiazhuang Tianhang Science & Technology Co., Ltd., Shijiazhuang, Hebei, China

E-mail: [songth@mail.nankai.edu.cn](mailto:songth@mail.nankai.edu.cn)

|                                          |            |
|------------------------------------------|------------|
| <b>1. General Information.....</b>       | <b>S2</b>  |
| <b>2. General Procedure.....</b>         | <b>S2</b>  |
| <b>3. Characterization Data .....</b>    | <b>S2</b>  |
| <b>4. Theoretical Calculations .....</b> | <b>S12</b> |
| <b>5. NMR Spectra of Compounds.....</b>  | <b>S21</b> |

## General Information

All commercially available reagents were used without further purification. Column chromatography was performed on silica gel (200-300 mesh). Thin-layer chromatography (TLC) was performed on silica gel plates.  $^1\text{H}$  NMR (500 MHz),  $^{13}\text{C}$  NMR (126 MHz), and  $^{19}\text{F}$  NMR (471 MHz) spectra were recorded on a JEOL ECZ500R NMR spectrometer. High-resolution mass spectra (HRMS) were recorded on a Bruker Micro TOF ESI mass spectrometer. Chemical shifts ( $\delta$ ) were reported in ppm, and coupling constants ( $J$ ) were given in Hertz (Hz). Data were reported as s – singlet, d – doublet, t – triplet, q – quartet, dd – doublet of doublets, m – multiplet, dm – doublet of multiplets. All of the linear tri-substituted enones were prepared according to literature procedures.<sup>1</sup> The 3-methylcyclohex-2-en-1-one, **1o**, and mercaptans were all commercially available reagents.

## General procedure

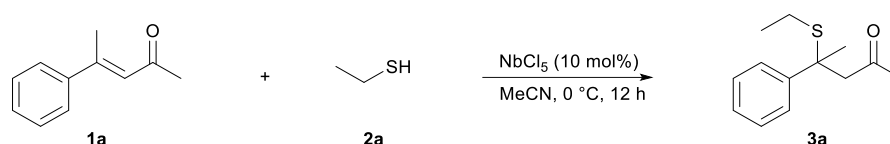

Take the synthesis of **3a** as an example. To a dry and  $\text{N}_2$ -filled round-bottom flask was added (E)-4-phenylpent-3-en-2-one, **1a** (0.2 mmol, 32.0 mg), ethanethiol, **2a** (0.4 mmol, 24.9 mg),  $\text{NbCl}_5$  (0.02 mmol, 5.4 mg), and 1.0 mL MeCN. The mixture was stirred at  $0\text{ }^\circ\text{C}$  for 12 hours. After the reaction was complete (monitored by TLC), the residual was extracted with ethyl acetate. The combined organic phases were dried over  $\text{Na}_2\text{SO}_4$ , and concentrated by rotary evaporation. The crude was further purified by silica gel column chromatography to afford 4-(ethylthio)-4-phenylpentan-2-one, **3a** as a light-yellow liquid (32.8 mg, 74%).

## Characterization data

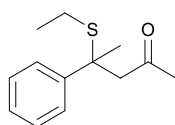

### 4-(ethylthio)-4-phenylpentan-2-one (**3a**)

Prepared according to the general procedure from (E)-4-phenylpent-3-en-2-one **1a** (32.0 mg, 0.2 mmol) and ethanethiol (24.8 mg, 0.4 mmol). The product was isolated as a light-yellow liquid (32.8 mg, 74%).

$^1\text{H}$  NMR (500 MHz, Chloroform-*d*)  $\delta$  7.55 – 7.43 (m, 2H), 7.31 (dd,  $J = 8.4, 7.1$  Hz, 2H), 7.22 – 7.17 (m, 1H), 3.25 (d,  $J = 15.1$  Hz, 1H), 2.92 (d,  $J = 15.1$  Hz, 1H), 2.30 (dq,  $J = 11.5, 7.4$  Hz, 1H), 2.12 (dq,  $J = 11.5, 7.5$  Hz, 1H), 1.91 (s, 3H), 1.87 (s, 3H), 1.03 (t,  $J = 7.5$  Hz, 3H).

$^{13}\text{C}$  NMR (126 MHz, Chloroform-*d*)  $\delta$  205.9, 144.2, 128.3 (2C), 126.8, 126.8 (2C), 55.4, 49.2, 31.9, 26.1, 23.0, 13.9.

HRMS (ESI):  $m/z$   $[\text{M}+\text{Na}]^+$  calcd for  $\text{C}_{13}\text{H}_{18}\text{OS}$ : 245.0971; found: 245.0968.

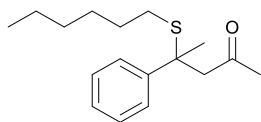

#### 4-(hexylthio)-4-phenylpentan-2-one (3b)

Prepared according to the general procedure from (E)-4-phenylpent-3-en-2-one **1a** (32.0 mg, 0.2 mmol) and hexane-1-thiol (47.2 mg, 0.4 mmol). The product was isolated as a light-yellow liquid (35.8 mg, 64%).

**<sup>1</sup>H NMR** (500 MHz, Chloroform-*d*)  $\delta$  7.51 – 7.47 (m, 2H), 7.30 (t, *J* = 7.8 Hz, 2H), 7.22 – 7.17 (m, 1H), 3.25 (d, *J* = 15.0 Hz, 1H), 2.92 (d, *J* = 15.0 Hz, 1H), 2.28 (dt, *J* = 11.5, 7.3 Hz, 1H), 2.09 (dt, *J* = 11.5, 7.4 Hz, 1H), 1.90 (s, 3H), 1.86 (s, 3H), 1.34 (ddd, *J* = 14.6, 7.8, 4.6 Hz, 2H), 1.27 – 1.16 (m, 4H), 1.16 – 1.09 (m, 2H), 0.82 (t, *J* = 7.2 Hz, 3H).

**<sup>13</sup>C NMR** (126 MHz, Chloroform-*d*)  $\delta$  205.9, 144.2, 128.3 (2C), 126.8 (2C), 126.8, 55.5, 49.1, 31.9, 31.4, 28.93, 28.9, 28.8, 26.1, 22.6, 14.1.

**HRMS (ESI):** *m/z* [M+Na]<sup>+</sup> calcd for C<sub>17</sub>H<sub>26</sub>OS: 301.1597; found: 301.1597.

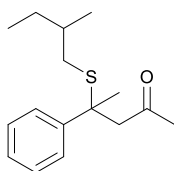

#### 4-((2-methylbutyl)thio)-4-phenylpentan-2-one (3c)

Prepared according to the general procedure from (E)-4-phenylpent-3-en-2-one **1a** (32.0 mg, 0.2 mmol) and 2-methylbutane-1-thiol (41.6 mg, 0.4 mmol). The product was isolated as a light-yellow liquid (28.4 mg, 54%).

**<sup>1</sup>H NMR** (500 MHz, Chloroform-*d*)  $\delta$  7.51 – 7.47 (m, 2H), 7.33 – 7.27 (m, 2H), 7.22 – 7.15 (m, 1H), 3.25 (dd, *J* = 15.0, 1.7 Hz, 1H), 2.92 (d, *J* = 14.9 Hz, 1H), 2.21 (dddd, *J* = 58.9, 11.7, 6.4, 1.2 Hz, 1H), 2.10 – 1.95 (m, 1H), 1.90 (d, *J* = 1.1 Hz, 3H), 1.86 (s, 3H), 1.38 – 1.26 (m, 2H), 1.13 – 1.00 (m, 1H), 0.82 (dt, *J* = 6.6, 1.8 Hz, 3H), 0.78 – 0.68 (m, 3H).

**<sup>13</sup>C NMR** (126 MHz, Chloroform-*d*)  $\delta$  206.0, 144.2, 128.2 (2C), 126.9 (2C), 126.8, 55.6 (d, *J* = 2.7 Hz), 49.0, 35.6 (d, *J* = 9.8 Hz), 34.7 (d, *J* = 2.9 Hz), 32.0, 28.9 (d, *J* = 9.3 Hz), 26.1, 19.3 (d, *J* = 2.8 Hz), 11.3 (d, *J* = 11.9 Hz).

**HRMS (ESI):** *m/z* [M+Na]<sup>+</sup> calcd for C<sub>16</sub>H<sub>24</sub>OS: 287.1440; found: 297.1429.

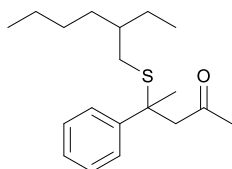

#### 4-((2-ethylhexyl)thio)-4-phenylpentan-2-one (3d)

Prepared according to the general procedure from (E)-4-phenylpent-3-en-2-one **1a** (32.0 mg, 0.2 mmol) and 2-ethylhexane-1-thiol (58.4 mg, 0.4 mmol). The product was isolated as a light-yellow liquid (36.7 mg, 60%).

**<sup>1</sup>H NMR** (500 MHz, Chloroform-*d*)  $\delta$  7.51 – 7.46 (m, 2H), 7.32 – 7.27 (m, 2H), 7.21 – 7.16 (m, 1H), 3.25 (d, *J* = 15.0 Hz, 1H), 2.92 (d, *J* = 14.9 Hz, 1H), 2.30 – 2.22 (m, 1H), 2.05 (ddd, *J* = 11.6, 5.7, 3.2

Hz, 1H), 1.90 (s, 3H), 1.85 (s, 3H), 1.27 – 1.21 (m, 3H), 1.17 (ddd,  $J = 9.3, 7.6, 4.8$  Hz, 4H), 1.09 – 1.00 (m, 2H), 0.82 (t,  $J = 7.3$  Hz, 3H), 0.69 (t,  $J = 7.2$  Hz, 3H).

$^{13}\text{C}$  NMR (126 MHz, Chloroform-*d*)  $\delta$  206.0, 144.2, 128.2 (2C), 127.0 (2C), 126.8, 55.5 (d,  $J = 3.5$  Hz), 48.9 (d,  $J = 2.6$  Hz), 39.2 (d,  $J = 2.6$  Hz), 32.7 (d,  $J = 7.4$  Hz), 32.6 (d,  $J = 5.1$  Hz), 31.9, 28.9 (d,  $J = 17.2$  Hz), 26.2 – 26.0 (m), 25.9 (d,  $J = 6.9$  Hz), 23.0 (d,  $J = 4.6$  Hz), 14.2, 10.9 (d,  $J = 13.6$  Hz).

**HRMS (ESI):**  $m/z$   $[\text{M}+\text{Na}]^+$  calcd for  $\text{C}_{19}\text{H}_{30}\text{OS}$ : 329.1910; found: 329.1900.

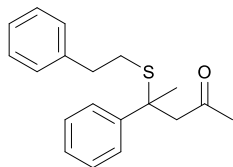

#### 4-(phenethylthio)-4-phenylpentan-2-one (3f)

Prepared according to the general procedure from (E)-4-phenylpent-3-en-2-one **1a** (32.0 mg, 0.2 mmol) and 2-ethylhexane-1-thiol (55.2 mg, 0.4 mmol). The product was isolated as a light-yellow oil (42.4 mg, 71%).

$^1\text{H}$  NMR (500 MHz, Chloroform-*d*)  $\delta$  7.53 – 7.46 (m, 2H), 7.36 – 7.28 (m, 2H), 7.23 (dd,  $J = 8.0, 6.4$  Hz, 3H), 7.19 – 7.15 (m, 1H), 7.05 – 6.99 (m, 2H), 3.26 (d,  $J = 15.2$  Hz, 1H), 2.92 (d,  $J = 15.2$  Hz, 1H), 2.67 – 2.60 (m, 1H), 2.60 – 2.57 (m, 1H), 2.57 – 2.51 (m, 1H), 2.43 – 2.33 (m, 1H), 1.91 (s, 3H), 1.88 (s, 3H).

$^{13}\text{C}$  NMR (126 MHz, Chloroform-*d*)  $\delta$  205.8, 144.0, 140.6, 128.5 (3C), 128.4 (2C), 127.0 (2C), 126.9 (2C), 126.4, 55.3, 49.5, 35.6, 31.9, 30.5, 26.2.

**HRMS (ESI):**  $m/z$   $[\text{M}+\text{H}]^+$  calcd for  $\text{C}_{19}\text{H}_{22}\text{OS}$ : 299.1464; found: 299.1464.

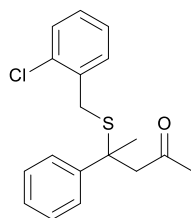

#### 4-((2-chlorobenzyl)thio)-4-phenylpentan-2-one (3g)

Prepared according to the general procedure from (E)-4-phenylpent-3-en-2-one **1a** (32.0 mg, 0.2 mmol) and (2-chlorophenyl)methanethiol (63.2 mg, 0.4 mmol). The product was isolated as a light-yellow oil (52.1 mg, 82%).

$^1\text{H}$  NMR (500 MHz, Chloroform-*d*)  $\delta$  7.55 (dq,  $J = 6.9, 1.1$  Hz, 2H), 7.34 (dd,  $J = 8.5, 7.1$  Hz, 2H), 7.29 – 7.25 (m, 1H), 7.25 – 7.21 (m, 1H), 7.10 (tt,  $J = 7.3, 5.3$  Hz, 2H), 7.07 – 7.03 (m, 1H), 3.62 (d,  $J = 11.9$  Hz, 1H), 3.40 (d,  $J = 11.9$  Hz, 1H), 3.30 (d,  $J = 15.2$  Hz, 1H), 2.96 (d,  $J = 15.2$  Hz, 1H), 1.94 (s, 3H), 1.91 (s, 3H).

$^{13}\text{C}$  NMR (126 MHz, Chloroform-*d*)  $\delta$  205.6, 143.5, 135.4, 134.1, 131.2, 129.7, 128.5, 128.4 (2C), 127.1, 127.0 (2C), 126.9, 55.0, 50.4, 31.9, 31.5, 26.1.

**HRMS (ESI):**  $m/z$   $[\text{M}+\text{H}]^+$  calcd for  $\text{C}_{18}\text{H}_{19}\text{ClOS}$ : 319.0918; found: 319.0916.

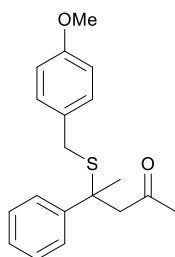

#### 4-((4-methoxybenzyl)thio)-4-phenylpentan-2-one (3h)

Prepared according to the general procedure from (E)-4-phenylpent-3-en-2-one **1a** (32.0 mg, 0.2 mmol) and (4-methoxyphenyl)methanethiol (61.6 mg, 0.4 mmol). The product was isolated as a light-yellow oil (52.6 mg, 84%).

**<sup>1</sup>H NMR** (500 MHz, Chloroform-*d*)  $\delta$  7.56 – 7.51 (m, 2H), 7.35 (t, *J* = 7.8 Hz, 2H), 7.27 – 7.21 (m, 1H), 7.06 – 6.98 (m, 2H), 6.80 – 6.72 (m, 2H), 3.75 (s, 3H), 3.45 (d, *J* = 12.0 Hz, 1H), 3.30 – 3.19 (m, 2H), 2.93 (d, *J* = 15.1 Hz, 1H), 1.90 (s, 3H), 1.90 (s, 3H).

**<sup>13</sup>C NMR** (126 MHz, Chloroform-*d*)  $\delta$  205.8, 158.6, 143.9, 130.2 (2C), 129.4, 128.4 (2C), 127.0, 127.0 (2C), 114.0 (2C), 55.4, 55.2, 50.2, 33.4, 31.9, 26.2.

**HRMS (ESI):** *m/z* [M+H]<sup>+</sup> calcd for C<sub>19</sub>H<sub>22</sub>O<sub>2</sub>S: 315.1413; found: 315.1411.

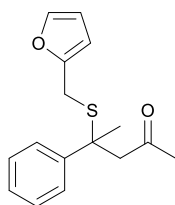

#### 4-((furan-2-ylmethyl)thio)-4-phenylpentan-2-one (3i)

Prepared according to the general procedure from (E)-4-phenylpent-3-en-2-one **1a** (32.0 mg, 0.2 mmol) and furan-2-ylmethanethiol (45.6 mg, 0.4 mmol). The product was isolated as a light-yellow oil (14.8 mg, 27%).

**<sup>1</sup>H NMR** (500 MHz, Chloroform-*d*)  $\delta$  7.52 – 7.48 (m, 2H), 7.33 (dd, *J* = 8.6, 7.1 Hz, 2H), 7.28 (dd, *J* = 2.0, 0.9 Hz, 1H), 7.24 – 7.20 (m, 1H), 6.22 (dd, *J* = 3.2, 1.8 Hz, 1H), 5.95 (d, *J* = 3.2 Hz, 1H), 3.47 (d, *J* = 14.2 Hz, 1H), 3.35 (d, *J* = 14.2 Hz, 1H), 3.26 (d, *J* = 15.3 Hz, 1H), 2.93 (d, *J* = 15.3 Hz, 1H), 1.90 (s, 3H), 1.87 (s, 3H).

**<sup>13</sup>C NMR** (126 MHz, Chloroform-*d*)  $\delta$  205.6, 151.2, 143.3, 142.0, 128.5 (2C), 127.1, 127.0(2C), 110.6, 107.5, 55.0, 50.1, 31.9, 26.4, 26.1.

**HRMS (ESI):** *m/z* [M+Na]<sup>+</sup> calcd for C<sub>16</sub>H<sub>18</sub>O<sub>2</sub>S: 297.0920; found: 297.0906.

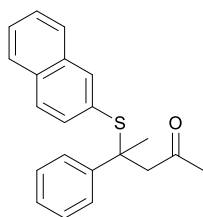

#### 4-((naphthalen-2-ylthio)-4-phenylpentan-2-one (3j)

Prepared according to the general procedure from (E)-4-phenylpent-3-en-2-one **1a** (32.0 mg, 0.2 mmol) and naphthalene-2-thiol (64.0 mg, 0.4 mmol). The product was isolated as a light-yellow oil (52.5 mg,

82%).

**<sup>1</sup>H NMR** (500 MHz, Chloroform-*d*)  $\delta$  7.80 – 7.76 (m, 1H), 7.70 – 7.62 (m, 3H), 7.51 – 7.43 (m, 2H), 7.38 (dq,  $J = 6.6, 1.8$  Hz, 2H), 7.31 – 7.26 (m, 2H), 7.25 – 7.21 (m, 1H), 7.13 (dq,  $J = 8.4, 1.8$  Hz, 1H), 3.52 (d,  $J = 15.6$  Hz, 1H), 3.01 – 2.93 (m, 1H), 1.92 (s, 3H), 1.87 – 1.82 (m, 3H).

**<sup>13</sup>C NMR** (126 MHz, Chloroform-*d*)  $\delta$  205.6, 143.7, 137.1, 133.5, 133.3, 133.3, 128.9, 128.2 (2C), 128.1, 127.9, 127.7, 127.1, 127.0, 126.9 (2C), 126.4, 54.9, 52.9, 31.8, 25.7.

**HRMS (ESI):**  $m/z$  [M+H]<sup>+</sup> calcd for C<sub>21</sub>H<sub>20</sub>OS: 321.1308; found: 321.1308.

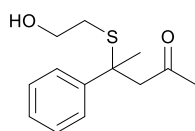

#### 4-((2-hydroxyethyl)thio)-4-phenylpentan-2-one (3m)

Prepared according to the general procedure from (E)-4-phenylpent-3-en-2-one **1a** (32.0 mg, 0.2 mmol) and 2-mercaptoethan-1-ol (31.2 mg, 0.4 mmol). The product was isolated as a colorless oil (30.4 mg, 64%).

**<sup>1</sup>H NMR** (500 MHz, Chloroform-*d*)  $\delta$  7.48 (d,  $J = 7.6$  Hz, 2H), 7.31 (t,  $J = 7.6$  Hz, 2H), 7.23 – 7.18 (m, 1H), 3.43 (dp,  $J = 20.2, 5.7$  Hz, 2H), 3.29 (d,  $J = 15.3$  Hz, 1H), 2.95 (d,  $J = 15.3$  Hz, 1H), 2.49 (dt,  $J = 12.3, 6.2$  Hz, 1H), 2.41 (dt,  $J = 12.4, 6.0$  Hz, 1H), 1.93 (s, 3H), 1.89 (s, 4H).

**<sup>13</sup>C NMR** (126 MHz, Chloroform-*d*)  $\delta$  205.6, 143.9, 128.5 (2C), 127.2, 126.8 (2C), 61.0, 55.3, 49.4, 32.5, 31.9, 26.3.

**HRMS (ESI):**  $m/z$  [M+Na]<sup>+</sup> calcd for C<sub>13</sub>H<sub>18</sub>O<sub>2</sub>S: 261.0920; found: 261.0918.

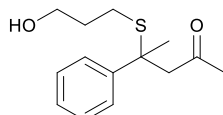

#### 4-((3-hydroxypropyl)thio)-4-phenylpentan-2-one (3n)

Prepared according to the general procedure from (E)-4-phenylpent-3-en-2-one **1a** (32.0 mg, 0.2 mmol) and 3-mercaptopropan-1-ol (36.8 mg, 0.4 mmol). The product was isolated as a colorless oil (42.4 mg, 84%).

**<sup>1</sup>H NMR** (500 MHz, Chloroform-*d*)  $\delta$  7.49 – 7.45 (m, 2H), 7.32 – 7.27 (m, 2H), 7.21 – 7.16 (m, 1H), 3.51 (t,  $J = 6.1$  Hz, 2H), 3.26 (d,  $J = 15.2$  Hz, 1H), 2.93 (d,  $J = 15.2$  Hz, 1H), 2.38 (dt,  $J = 11.8, 7.1$  Hz, 1H), 2.20 (dt,  $J = 11.8, 7.3$  Hz, 1H), 1.90 (s, 3H), 1.86 (s, 3H), 1.75 (t,  $J = 11.9$  Hz, 1H), 1.57 (dddd,  $J = 13.3, 8.4, 4.6, 1.7$  Hz, 2H).

**<sup>13</sup>C NMR** (126 MHz, Chloroform-*d*)  $\delta$  206.0, 144.0, 128.4 (2C), 127.0, 126.8 (2C), 61.5, 55.2, 49.3, 31.9, 31.5, 26.1, 25.4.

**HRMS (ESI):**  $m/z$  [M+H]<sup>+</sup> calcd for C<sub>14</sub>H<sub>20</sub>O<sub>2</sub>S: 253.1257; found: 253.1246.

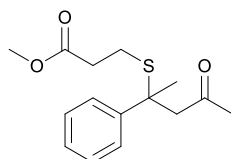

#### methyl 3-((4-oxo-2-phenylpentan-2-yl)thio)propanoate (3o)

Prepared according to the general procedure from (E)-4-phenylpent-3-en-2-one **1a** (32.0 mg, 0.2 mmol)

and methyl 3-mercaptopropanoate (48.0 mg, 0.4 mmol). The product was isolated as a light-yellow oil (38.1 mg, 68%).

**<sup>1</sup>H NMR** (500 MHz, Chloroform-*d*)  $\delta$  7.49 – 7.45 (m, 2H), 7.33 – 7.28 (m, 2H), 7.22 – 7.17 (m, 1H), 3.60 (d,  $J = 0.9$  Hz, 3H), 3.26 (d,  $J = 15.3$  Hz, 1H), 2.92 (d,  $J = 15.3$  Hz, 1H), 2.57 – 2.49 (m, 1H), 2.44 – 2.37 (m, 1H), 2.29 (t,  $J = 7.6$  Hz, 2H), 1.90 (s, 3H), 1.87 (s, 3H).

**<sup>13</sup>C NMR** (126 MHz, Chloroform-*d*)  $\delta$  205.6, 172.4, 143.7, 128.4 (2C), 127.1 (2C), 126.8, 55.1, 51.9, 49.5, 33.9, 31.9, 26.0, 23.9.

**HRMS (ESI):**  $m/z$  [M+Na]<sup>+</sup> calcd for C<sub>15</sub>H<sub>20</sub>O<sub>3</sub>S: 303.1025; found: 303.1017.

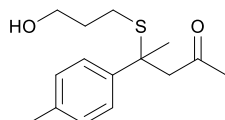

#### 4-((3-hydroxypropyl)thio)-4-(p-tolyl)pentan-2-one (3q)

Prepared according to the general procedure from (E)-4-(p-tolyl)pent-3-en-2-one (34.8 mg, 0.2 mmol) and 3-mercaptopropan-1-ol **21** (36.8 mg, 0.4 mmol). The product was isolated as a light-yellow oil (38.5 mg, 72%).

**<sup>1</sup>H NMR** (500 MHz, Chloroform-*d*)  $\delta$  7.37 – 7.34 (m, 2H), 7.10 (d,  $J = 8.1$  Hz, 2H), 3.53 (t,  $J = 6.1$  Hz, 2H), 3.24 (d,  $J = 15.1$  Hz, 1H), 2.91 (d,  $J = 15.0$  Hz, 1H), 2.39 (dt,  $J = 11.8, 7.0$  Hz, 1H), 2.29 (s, 3H), 2.21 (dt,  $J = 11.8, 7.2$  Hz, 1H), 1.90 (s, 3H), 1.84 (s, 3H), 1.72 – 1.67 (m, 1H), 1.63 – 1.55 (m, 2H).

**<sup>13</sup>C NMR** (126 MHz, Chloroform-*d*)  $\delta$  206.1, 141.0, 136.6, 129.1 (2C), 126.7 (2C), 61.6, 55.3, 49.2, 32.0, 31.5, 26.2, 25.4, 21.1.

**HRMS (ESI):**  $m/z$  [M+H]<sup>+</sup> calcd for C<sub>15</sub>H<sub>22</sub>O<sub>2</sub>S: 267.1413; found: 267.1383.

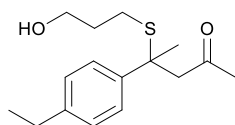

#### 4-((3-hydroxypropyl)thio)-4-(4-ethylphenyl)pentan-2-one (3r)

Prepared according to the general procedure from (E)-4-(4-ethylphenyl)pent-3-en-2-one (37.6 mg, 0.2 mmol) and 3-mercaptopropan-1-ol **21** (36.8 mg, 0.4 mmol). The product was isolated as a light-yellow oil (34.3 mg, 61%).

**<sup>1</sup>H NMR** (500 MHz, Chloroform-*d*)  $\delta$  7.40 – 7.36 (m, 2H), 7.13 (d,  $J = 8.2$  Hz, 2H), 3.53 (t,  $J = 6.1$  Hz, 2H), 3.24 (d,  $J = 15.0$  Hz, 1H), 2.92 (d,  $J = 15.0$  Hz, 1H), 2.60 (q,  $J = 7.6$  Hz, 2H), 2.39 (dt,  $J = 11.8, 7.0$  Hz, 1H), 2.22 (dt,  $J = 11.8, 7.2$  Hz, 1H), 1.91 (s, 3H), 1.84 (s, 3H), 1.64 (d,  $J = 6.1$  Hz, 1H), 1.59 (dddd,  $J = 13.2, 7.2, 6.0, 2.5$  Hz, 2H), 1.20 (t,  $J = 7.6$  Hz, 3H).

**<sup>13</sup>C NMR** (126 MHz, Chloroform-*d*)  $\delta$  206.2, 142.9, 141.2, 127.8 (2C), 126.7 (2C), 61.5, 55.3, 49.2, 32.0, 31.5, 28.4, 26.2, 25.4, 15.4.

**HRMS (ESI):**  $m/z$  [M+Na]<sup>+</sup> calcd for C<sub>16</sub>H<sub>24</sub>O<sub>2</sub>S: 303.1389; found: 303.1375.

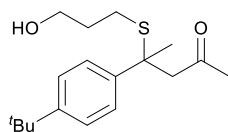

#### 4-(4-(tert-butyl)phenyl)-4-((3-hydroxypropyl)thio)pentan-2-one (3s)

Prepared according to the general procedure from (E)-4-(4-(tert-butyl)phenyl)pent-3-en-2-one (43.2 mg, 0.2 mmol) and 3-mercaptopropan-1-ol **21** (36.8 mg, 0.4 mmol). The product was isolated as a light-yellow oil (18.9 mg, 31%).

<sup>1</sup>H NMR (500 MHz, Chloroform-*d*) δ 7.40 (dd, *J* = 8.9, 2.1 Hz, 2H), 7.35 – 7.29 (m, 2H), 3.56 (t, *J* = 6.0 Hz, 2H), 3.25 (d, *J* = 15.0 Hz, 1H), 2.94 (d, *J* = 15.1 Hz, 1H), 2.41 (dt, *J* = 11.5, 6.9 Hz, 1H), 2.25 (dt, *J* = 11.8, 7.2 Hz, 1H), 1.93 (s, 3H), 1.85 (s, 3H), 1.67 – 1.56 (m, 3H), 1.28 (s, 9H).

<sup>13</sup>C NMR (126 MHz, Chloroform-*d*) δ 206.1, 149.8, 140.9, 126.4 (2C), 125.2 (2C), 61.5, 55.2, 49.1, 34.5, 32.0, 31.5, 31.4 (3C), 26.2, 25.4.

HRMS (ESI): *m/z* [M+Na]<sup>+</sup> calcd for C<sub>18</sub>H<sub>28</sub>O<sub>2</sub>S: 331.1702; found: 331.1692.

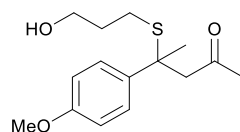

#### 4-((3-hydroxypropyl)thio)-4-(4-methoxyphenyl)pentan-2-one (3t)

Prepared according to the general procedure from (E)-4-(4-methoxyphenyl)pent-3-en-2-one (38.0 mg, 0.2 mmol) and 3-mercaptopropan-1-ol **21** (36.8 mg, 0.4 mmol). The product was isolated as a light-yellow oil (34.2 mg, 61%).

<sup>1</sup>H NMR (500 MHz, Chloroform-*d*) δ 7.41 – 7.36 (m, 2H), 6.86 – 6.79 (m, 2H), 3.76 (s, 3H), 3.54 (t, *J* = 6.1 Hz, 2H), 3.21 (d, *J* = 15.0 Hz, 1H), 2.89 (d, *J* = 15.0 Hz, 1H), 2.38 (dt, *J* = 11.8, 7.1 Hz, 1H), 2.20 (dt, *J* = 11.8, 7.2 Hz, 1H), 1.89 (s, 3H), 1.83 (s, 3H), 1.75 (p, *J* = 7.3, 6.4 Hz, 1H), 1.59 (dddd, *J* = 13.3, 7.5, 6.1, 1.4 Hz, 2H).

<sup>13</sup>C NMR (126 MHz, Chloroform-*d*) δ 206.1, 158.3, 135.9, 128.0 (2C), 113.6 (2C), 61.7, 55.4, 55.3, 49.1, 32.0, 31.6, 26.3, 25.5.

HRMS (ESI): *m/z* [M+Na]<sup>+</sup> calcd for C<sub>15</sub>H<sub>22</sub>O<sub>3</sub>S: 305.1182; found: 305.1174.

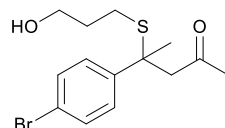

#### 4-(4-bromophenyl)-4-((3-hydroxypropyl)thio)pentan-2-one (3u)

Prepared according to the general procedure from (E)-4-(4-bromophenyl)pent-3-en-2-one (47.6 mg, 0.2 mmol) and 3-mercaptopropan-1-ol **21** (36.8 mg, 0.4 mmol). The product was isolated as a light-yellow oil (46.3 mg, 70%).

<sup>1</sup>H NMR (500 MHz, Chloroform-*d*) δ 7.46 – 7.39 (m, 2H), 7.36 – 7.29 (m, 2H), 3.55 (t, *J* = 6.1 Hz, 2H), 3.22 (d, *J* = 15.9 Hz, 1H), 2.93 (d, *J* = 15.9 Hz, 1H), 2.37 (dt, *J* = 11.7, 7.1 Hz, 1H), 2.18 (dt, *J* = 11.7, 7.2 Hz, 1H), 1.95 (s, 3H), 1.83 (s, 3H), 1.72 (s, 1H), 1.60 (p, *J* = 6.7 Hz, 2H).

<sup>13</sup>C NMR (126 MHz, Chloroform-*d*) δ 205.4, 143.4, 131.4 (2C), 128.7 (2C), 120.8, 61.6, 54.9, 48.8, 31.9, 31.5, 26.0, 25.4.

HRMS (ESI): *m/z* [M+Na]<sup>+</sup> calcd for C<sub>14</sub>H<sub>19</sub>BrO<sub>2</sub>S: 353.0181; found: 353.0164.



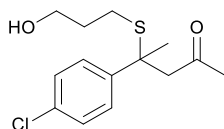

#### 4-(4-chlorophenyl)-4-((3-hydroxypropyl)thio)pentan-2-one (3v)

Prepared according to the general procedure from (E)-4-(4-chlorophenyl)pent-3-en-2-one (38.8 mg, 0.2 mmol) and 3-mercaptopropan-1-ol **2I** (36.8 mg, 0.4 mmol). The product was isolated as a light-yellow oil (48.0 mg, 84%).

**<sup>1</sup>H NMR** (500 MHz, Chloroform-*d*)  $\delta$  7.42 – 7.36 (m, 2H), 7.28 – 7.21 (m, 2H), 3.57 – 3.47 (m, 2H), 3.22 (d, *J* = 15.8 Hz, 1H), 2.93 (d, *J* = 15.8 Hz, 1H), 2.36 (dt, *J* = 11.7, 7.2 Hz, 1H), 2.18 (dt, *J* = 11.7, 7.2 Hz, 1H), 1.94 (s, 3H), 1.85 (s, 1H), 1.83 (s, 3H), 1.65 – 1.54 (m, 2H).

**<sup>13</sup>C NMR** (126 MHz, Chloroform-*d*)  $\delta$  205.5, 142.8, 132.6, 128.4 (2C), 128.3 (2C), 61.6, 55.0, 48.8, 31.8, 31.5, 26.0, 25.4.

**HRMS (ESI):** *m/z* [M+Na]<sup>+</sup> calcd for C<sub>14</sub>H<sub>19</sub>ClO<sub>2</sub>S: 309.0686; found: 309.0672.

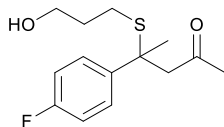

#### 4-(4-fluorophenyl)-4-((3-hydroxypropyl)thio)pentan-2-one (3w)

Prepared according to the general procedure from (E)-4-(4-fluorophenyl)pent-3-en-2-one (35.6 mg, 0.2 mmol) and 3-mercaptopropan-1-ol **2I** (36.8 mg, 0.4 mmol). The product was isolated as a light-yellow oil (41.1 mg, 76%).

**<sup>1</sup>H NMR** (500 MHz, Chloroform-*d*)  $\delta$  7.48 – 7.40 (m, 2H), 7.02 – 6.93 (m, 2H), 3.54 (t, *J* = 6.1 Hz, 2H), 3.22 (d, *J* = 15.6 Hz, 1H), 2.92 (d, *J* = 15.6 Hz, 1H), 2.38 (dt, *J* = 11.7, 7.2 Hz, 1H), 2.19 (dt, *J* = 11.6, 7.2 Hz, 1H), 1.93 (s, 3H), 1.85 (s, 3H), 1.82 – 1.78 (m, 1H), 1.64 – 1.54 (m, 2H).

**<sup>13</sup>C NMR** (126 MHz, Chloroform-*d*)  $\delta$  205.7, 161.5 (d, *J* = 246.4 Hz), 139.9 (d, *J* = 4.0 Hz), 128.6 (d, *J* = 8.5 Hz) (2C), 115.1 (d, *J* = 21.4 Hz) (2C), 61.6, 55.2, 48.8, 31.9, 31.5, 26.2, 25.4.

**<sup>19</sup>F NMR** (471 MHz, Chloroform-*d*)  $\delta$  -115.7 (t, *J* = 6.8 Hz).

**HRMS (ESI):** *m/z* [M+Na]<sup>+</sup> calcd for C<sub>14</sub>H<sub>19</sub>FO<sub>2</sub>S: 293.0982; found: 293.0972.

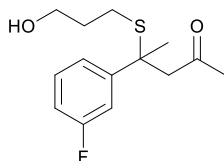

#### 4-(3-fluorophenyl)-4-((3-hydroxypropyl)thio)pentan-2-one (3x)

Prepared according to the general procedure from (E)-4-(3-fluorophenyl)pent-3-en-2-one (35.6 mg, 0.2 mmol) and 3-mercaptopropan-1-ol **2I** (36.8 mg, 0.4 mmol). The product was isolated as a light-yellow oil (48.1 mg, 89%).

**<sup>1</sup>H NMR** (500 MHz, Chloroform-*d*)  $\delta$  7.28 – 7.20 (m, 2H), 7.17 (dt, *J* = 10.7, 2.0 Hz, 1H), 6.91 – 6.84 (m, 1H), 3.56 – 3.45 (m, 2H), 3.22 (d, *J* = 15.8 Hz, 1H), 2.93 (d, *J* = 15.7 Hz, 1H), 2.38 (dt, *J* = 11.7, 7.2 Hz, 1H), 2.20 (dt, *J* = 11.7, 7.3 Hz, 1H), 1.95 (s, 3H), 1.89 – 1.85 (m, 1H), 1.83 (s, 3H), 1.65 – 1.53 (m, 2H).

**<sup>13</sup>C NMR** (126 MHz, Chloroform-*d*)  $\delta$  205.5, 162.8 (d, *J* = 245.2 Hz), 147.1 (d, *J* = 6.6 Hz), 129.7 (d, *J*

= 8.3 Hz), 122.5 (d,  $J = 2.8$  Hz), 113.9 (dd,  $J = 31.8, 21.9$  Hz) (2C), 61.5, 54.9, 48.9, 31.8, 31.5, 26.0, 25.4.

$^{19}\text{F}$  NMR (471 MHz, Chloroform-*d*)  $\delta$  -112.6 (d,  $J = 8.8$  Hz).

HRMS (ESI):  $m/z$   $[\text{M}+\text{Na}]^+$  calcd for  $\text{C}_{14}\text{H}_{19}\text{FO}_2\text{S}$ : 293.0982; found: 293.0965.

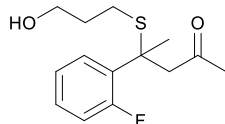

#### 4-(2-fluorophenyl)-4-((3-hydroxypropyl)thio)pentan-2-one (3y)

Prepared according to the general procedure from (E)-4-(2-fluorophenyl)pent-3-en-2-one (35.6 mg, 0.2 mmol) and 3-mercaptopropan-1-ol **21** (36.8 mg, 0.4 mmol). The product was isolated as a light-yellow oil (38.4 mg, 71%).

$^1\text{H}$  NMR (500 MHz, Chloroform-*d*)  $\delta$  7.36 (td,  $J = 8.2, 1.7$  Hz, 1H), 7.20 (tdd,  $J = 7.7, 4.8, 1.7$  Hz, 1H), 7.08 (td,  $J = 7.6, 1.4$  Hz, 1H), 6.96 (ddd,  $J = 13.1, 8.1, 1.4$  Hz, 1H), 3.70 (d,  $J = 17.0$  Hz, 1H), 3.52 (t,  $J = 6.0$  Hz, 2H), 2.93 (dd,  $J = 17.0, 2.5$  Hz, 1H), 2.46 (dt,  $J = 11.7, 7.1$  Hz, 1H), 2.28 (dt,  $J = 11.8, 7.1$  Hz, 1H), 2.01 (s, 3H), 1.88 (s, 3H), 1.78 (s, 1H), 1.57 (p,  $J = 6.6$  Hz, 2H).

$^{13}\text{C}$  NMR (126 MHz, Chloroform-*d*)  $\delta$  205.6, 160.8 (d,  $J = 248.4$  Hz), 130.7 (d,  $J = 9.4$  Hz), 129.0, 129.0 (d,  $J = 4.8$  Hz), 124.0 (d,  $J = 3.2$  Hz), 116.6 (d,  $J = 24.2$  Hz), 61.6, 53.7 (d,  $J = 6.9$  Hz), 47.1 (d,  $J = 2.9$  Hz), 31.6, 31.1, 27.5, 25.5.

$^{19}\text{F}$  NMR (471 MHz, Chloroform-*d*)  $\delta$  -108.3 (t,  $J = 10.3$  Hz).

HRMS (ESI):  $m/z$   $[\text{M}+\text{Na}]^+$  calcd for  $\text{C}_{14}\text{H}_{19}\text{FO}_2\text{S}$ : 293.0982; found: 293.0969.

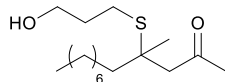

#### 4-((3-hydroxypropyl)thio)-4-methylheptan-2-one (3z)

Prepared according to the general procedure from (E)-4-methyldodec-3-en-2-one (39.2 mg, 0.2 mmol) and 3-mercaptopropan-1-ol **21** (36.8 mg, 0.4 mmol). The product was isolated as a light-yellow oil (35.1 mg, 61%).

$^1\text{H}$  NMR (500 MHz, Chloroform-*d*)  $\delta$  3.70 (t,  $J = 6.0$  Hz, 2H), 2.65 (s, 2H), 2.61 – 2.50 (m, 2H), 2.16 (s, 3H), 1.77 (p,  $J = 6.7$  Hz, 2H), 1.60 (dt,  $J = 9.5, 5.5$  Hz, 2H), 1.35 (s, 5H), 1.24 (q,  $J = 6.7, 5.4$  Hz, 11H), 0.84 (t,  $J = 6.9$  Hz, 3H).

$^{13}\text{C}$  NMR (126 MHz, Chloroform-*d*)  $\delta$  207.4, 61.7, 52.7, 47.3, 40.0, 32.5, 31.9, 31.9, 30.0, 29.6, 29.4, 26.3, 24.5, 24.3, 22.8, 14.2.

HRMS (ESI):  $m/z$   $[\text{M}+\text{Na}]^+$  calcd for  $\text{C}_{16}\text{H}_{32}\text{O}_2\text{S}$ : 311.2015; found: 311.2006.

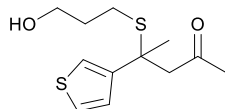

#### 4-((3-hydroxypropyl)thio)-4-(thiophen-3-yl)pentan-2-one (3za)

Prepared according to the general procedure from (E)-4-(thiophen-2-yl)pent-3-en-2-one (33.2 mg, 0.2 mmol) and 3-mercaptopropan-1-ol **21** (36.8 mg, 0.4 mmol). The product was isolated as a yellow liquid (15.9 mg, 31%).

**<sup>1</sup>H NMR** (500 MHz, Chloroform-*d*)  $\delta$  7.29 (dd,  $J = 5.1, 2.9$  Hz, 1H), 7.20 (dd,  $J = 5.1, 1.4$  Hz, 1H), 7.06 (dd,  $J = 3.0, 1.4$  Hz, 1H), 3.58 (t,  $J = 6.1$  Hz, 2H), 3.14 (d,  $J = 14.6$  Hz, 1H), 2.90 (d,  $J = 14.5$  Hz, 1H), 2.42 (dt,  $J = 11.9, 7.0$  Hz, 1H), 2.26 (dt,  $J = 11.9, 7.2$  Hz, 1H), 1.95 (s, 3H), 1.82 (s, 3H), 1.68 (dd,  $J = 7.5, 3.4$  Hz, 1H), 1.62 (dddd,  $J = 13.3, 7.3, 6.1, 2.4$  Hz, 2H).

**<sup>13</sup>C NMR** (126 MHz, Chloroform-*d*)  $\delta$  206.0, 146.2, 127.0, 126.3, 121.3, 61.7, 54.9, 47.2, 32.0, 31.6, 26.6, 25.5.

**HRMS (ESI):**  $m/z$  [M+Na]<sup>+</sup> calcd for C<sub>12</sub>H<sub>18</sub>O<sub>2</sub>S<sub>2</sub>: 281.0640; found: 281.0628.

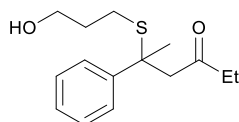

### 5-((3-hydroxypropyl)thio)-5-phenylhexan-3-one (3zb)

Prepared according to the general procedure from (E)-5-phenylhex-4-en-3-one (34.8 mg, 0.2 mmol) and 3-mercaptopropan-1-ol **21** (36.8 mg, 0.4 mmol). The product was isolated as a light-yellow oil (42.5 mg, 80%).

**<sup>1</sup>H NMR** (500 MHz, Chloroform-*d*)  $\delta$  7.50 – 7.43 (m, 2H), 7.29 (t,  $J = 7.8$  Hz, 2H), 7.18 (t,  $J = 7.3$  Hz, 1H), 3.52 (t,  $J = 6.1$  Hz, 2H), 3.22 (d,  $J = 15.2$  Hz, 1H), 2.91 (d,  $J = 15.2$  Hz, 1H), 2.39 (dt,  $J = 11.8, 7.0$  Hz, 1H), 2.27 (dq,  $J = 18.1, 7.3$  Hz, 1H), 2.19 (dt,  $J = 11.8, 7.2$  Hz, 1H), 2.09 (dq,  $J = 18.0, 7.2$  Hz, 1H), 1.87 (s, 3H), 1.70 (s, 1H), 1.62 – 1.52 (m, 2H), 0.86 (t,  $J = 7.3$  Hz, 3H).

**<sup>13</sup>C NMR** (126 MHz, Chloroform-*d*)  $\delta$  208.4, 144.2, 128.3 (2C), 126.9, 126.8 (2C), 61.6, 54.1, 49.5, 37.8, 31.6, 26.2, 25.41, 7.6.

**HRMS (ESI):**  $m/z$  [M+Na]<sup>+</sup> calcd for C<sub>15</sub>H<sub>22</sub>O<sub>2</sub>S: 289.1233; found: 289.1223.

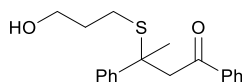

### 3-((3-hydroxypropyl)thio)-1,3-diphenylbutan-1-one (3zc)

Prepared according to the general procedure from (E)-1,3-diphenylbut-2-en-1-one (44.4 mg, 0.2 mmol) and 3-mercaptopropan-1-ol **21** (36.8 mg, 0.4 mmol). The product was isolated as a light-yellow oil (28.9 mg, 46%).

**<sup>1</sup>H NMR** (500 MHz, Chloroform-*d*)  $\delta$  7.85 (dt,  $J = 8.3, 1.1$  Hz, 2H), 7.55 – 7.46 (m, 3H), 7.40 (t,  $J = 7.7$  Hz, 2H), 7.28 (t,  $J = 7.7$  Hz, 2H), 7.21 – 7.14 (m, 1H), 3.90 (d,  $J = 16.6$  Hz, 1H), 3.61 – 3.43 (m, 3H), 2.43 (dt,  $J = 12.0, 7.0$  Hz, 1H), 2.26 (dt,  $J = 12.1, 7.2$  Hz, 1H), 1.98 (s, 3H), 1.68 – 1.52 (m, 3H).

**<sup>13</sup>C NMR** (126 MHz, Chloroform-*d*)  $\delta$  196.8, 144.3, 137.6, 133.2, 128.6 (2C), 128.2 (2C), 128.1 (2C), 126.7 (d,  $J = 3.8$  Hz) (3C), 61.6, 49.8, 49.7, 31.6, 26.4, 25.5.

**HRMS (ESI):**  $m/z$  [M+Na]<sup>+</sup> calcd for C<sub>19</sub>H<sub>22</sub>O<sub>2</sub>S: 337.1233; found: 337.1220.

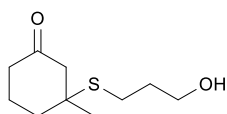

### 3-((3-hydroxypropyl)thio)-3-methylcyclohexan-1-one (3zd)

Prepared according to the general procedure from 3-methylcyclohex-2-en-1-one (22.0 mg, 0.2 mmol) and 3-mercaptopropan-1-ol **21** (36.8 mg, 0.4 mmol). The product was isolated as a yellow liquid (11.3

mg, 28%).

**<sup>1</sup>H NMR** (500 MHz, Chloroform-*d*)  $\delta$  3.70 (ddq,  $J = 16.5, 11.0, 5.8$  Hz, 2H), 2.69 – 2.51 (m, 3H), 2.44 – 2.29 (m, 2H), 2.22 (dtd,  $J = 14.6, 6.3, 3.0$  Hz, 1H), 2.17 – 2.05 (m, 1H), 2.00 – 1.85 (m, 3H), 1.85 – 1.76 (m, 2H), 1.76 – 1.69 (m, 1H), 1.38 (d,  $J = 1.1$  Hz, 3H).

**<sup>13</sup>C NMR** (126 MHz, Chloroform-*d*)  $\delta$  209.7, 61.2, 53.1, 48.9, 40.4, 37.0, 31.7, 29.3, 23.8, 22.3.

**HRMS (ESI):**  $m/z$  [M+Na]<sup>+</sup> calcd for C<sub>10</sub>H<sub>18</sub>O<sub>2</sub>S: 225.0920; found: 225.0905.

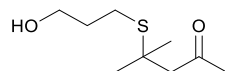

#### 4-((3-hydroxypropyl)thio)-4-methylpentan-2-one (3ze)

Prepared according to the general procedure from 4-methylpent-3-en-2-one (19.6 mg, 0.2 mmol) and 3-mercaptopropan-1-ol **21** (36.8 mg, 0.4 mmol). The product was isolated as a light yellow liquid (33.7 mg, 89%).

**<sup>1</sup>H NMR** (500 MHz, Chloroform-*d*)  $\delta$  3.69 (t,  $J = 6.0$  Hz, 2H), 2.66 (s, 2H), 2.62 (t,  $J = 7.2$  Hz, 2H), 2.15 (s, 4H), 1.83 – 1.73 (m, 2H), 1.38 (s, 6H).

**<sup>13</sup>C NMR** (126 MHz, Chloroform-*d*)  $\delta$  207.4, 61.6, 54.6, 43.6, 32.4, 32.0, 28.7 (2C), 24.8.

**HRMS (ESI):**  $m/z$  [M+H]<sup>+</sup> calcd for C<sub>9</sub>H<sub>18</sub>O<sub>2</sub>S: 191.1100; found: 191.1079.

## Theoretical Calculations

### Computational Methods

All the calculations are performed in Gaussian 16 package.<sup>2</sup> The geometrical configurations are obtained by density functional theory (DFT) calculations, in which the PBE0 functional is used with Grimme's D3BJ dispersion<sup>3, 4</sup> at the def2-SV(P) basis set.<sup>5</sup> The effect of solvation was taken into account by using the IEFPCM model<sup>6</sup>. Vibrational frequencies were calculated at the same level of theory to obtain the thermal correction and confirm the optimized geometries as minima (no imaginary frequencies). Transition structures have also been verified by intrinsic reaction coordinate. More accurate electronic energies were obtained by single-point energy calculations at the PBE0-D3/def2-TZVP-SMD level of theory.<sup>5, 7, 8</sup> Molecular structure figures were prepared using CYLview.<sup>9</sup>

**Table S1** DFT calculated free energy for [NbCl<sub>5</sub>(EtSH)] (**4a**) + solvent → [NbCl<sub>5</sub>(solvent)] + EtSH.

| Entry | solvent | $\Delta G$ (kcal/mol) |
|-------|---------|-----------------------|
| 1     | THF     | -8.4                  |
| 2     | DMF     | -13.0                 |

### Cartesian coordinates of the species

In MeCN:

NbCl<sub>5</sub> dimer

|    |             |             |             |
|----|-------------|-------------|-------------|
| Nb | 2.00735700  | -0.00000200 | 0.00033200  |
| Nb | -2.00726800 | -0.00000400 | -0.00037700 |
| Cl | 0.00165600  | 0.00003100  | 1.62459600  |
| Cl | -3.41126400 | -0.00006400 | -1.76598200 |
| Cl | -1.72012800 | 2.28642400  | -0.00162000 |
| Cl | -3.39904800 | 0.00006800  | 1.77512600  |
| Cl | -1.72011600 | -2.28642800 | -0.00151100 |
| Cl | -0.00171900 | -0.00002400 | -1.62468500 |
| Cl | 3.41049900  | 0.00002700  | 1.76654600  |
| Cl | 3.40005200  | -0.00001900 | -1.77443500 |
| Cl | 1.71992400  | 2.28636700  | 0.00100400  |
| Cl | 1.71992700  | -2.28636700 | 0.00107100  |

#### EtSH

|   |             |             |             |
|---|-------------|-------------|-------------|
| C | -1.63116300 | -0.33047000 | 0.00004800  |
| H | -1.59959400 | -0.97638200 | -0.89092100 |
| H | -1.59954400 | -0.97637000 | 0.89102400  |
| H | -2.59519400 | 0.19999500  | 0.00007200  |
| C | -0.48789600 | 0.66567000  | 0.00000900  |
| H | -0.53343200 | 1.31031600  | -0.89011500 |
| H | -0.53338300 | 1.31032900  | 0.89012500  |
| S | 1.10389100  | -0.23290900 | -0.00002900 |
| H | 1.91324400  | 0.84746400  | -0.00006000 |

#### 4a

|    |             |             |             |
|----|-------------|-------------|-------------|
| Nb | 0.64724700  | -0.04493100 | 0.00100600  |
| S  | -1.89207000 | 0.94106500  | -0.06698500 |
| C  | -3.08197700 | -0.43972600 | -0.15702700 |
| H  | -2.93717300 | -0.84278100 | -1.16915600 |
| H  | -2.76016600 | -1.20359100 | 0.56435800  |
| C  | -4.50390400 | 0.02206700  | 0.07382700  |
| H  | -5.18038000 | -0.83822400 | -0.04175300 |
| H  | -4.64097300 | 0.42318700  | 1.08887800  |
| H  | -4.80336400 | 0.79289700  | -0.65065200 |
| Cl | 0.80226100  | 1.45933800  | 1.77341500  |
| Cl | -0.23904100 | -1.63024800 | 1.46887300  |
| Cl | -0.18879000 | -1.26898300 | -1.79629200 |
| Cl | 2.76669500  | -0.88356800 | 0.04344400  |
| Cl | 1.07214100  | 1.71787300  | -1.46006300 |
| H  | -2.05220800 | 1.25457100  | 1.23863300  |

#### TS<sub>4a-5a</sub>

| ===== |             |             |             |
|-------|-------------|-------------|-------------|
| Nb    | -0.60545100 | 0.18959300  | -0.01025600 |
| S     | 1.73672300  | 0.05820200  | -0.89286100 |
| C     | 2.99145200  | 0.49155500  | 0.36829300  |
| H     | 2.82016800  | 1.53856900  | 0.65372800  |
| H     | 2.81563900  | -0.13771700 | 1.25189700  |
| C     | 4.37908900  | 0.27793100  | -0.20095300 |
| H     | 5.12718100  | 0.55536900  | 0.55751600  |
| H     | 4.54431200  | -0.77505300 | -0.47302800 |
| H     | 4.55285700  | 0.89829800  | -1.09243900 |
| Cl    | 0.38634600  | -2.37691500 | 0.46167200  |
| Cl    | 0.33383300  | 0.72624300  | 2.02287600  |
| Cl    | -1.31902800 | 2.28331100  | -0.46331700 |
| Cl    | -2.46032100 | -0.81138500 | 0.89681700  |
| Cl    | -0.96210900 | -0.63562300 | -2.14732400 |
| H     | 1.31426300  | -1.55666800 | -0.29776700 |

**5a**

| ===== |             |             |             |
|-------|-------------|-------------|-------------|
| Nb    | 0.56949300  | 0.05298100  | 0.07209900  |
| S     | -1.50234500 | -0.84282700 | -0.55413100 |
| C     | -2.90069600 | 0.31041800  | -0.27093900 |
| H     | -2.78295400 | 0.74422200  | 0.73078400  |
| H     | -2.81067100 | 1.11868800  | -1.01072700 |
| C     | -4.20584700 | -0.44620200 | -0.40292700 |
| H     | -5.04181700 | 0.25032000  | -0.23530500 |
| H     | -4.32411400 | -0.88576100 | -1.40414500 |
| H     | -4.28108900 | -1.25142300 | 0.34271000  |
| Cl    | 1.25732900  | -2.13099600 | -0.39536400 |
| Cl    | -0.41124300 | 2.15222300  | 0.11732500  |
| Cl    | 2.20849900  | 0.86052600  | -1.38969700 |
| Cl    | 0.62589800  | -0.16694900 | 2.34596700  |

**(E)-4-phenylpent-3-en-2-one**

| ===== |             |             |             |
|-------|-------------|-------------|-------------|
| C     | -0.46591000 | 0.52356700  | -0.00002600 |
| C     | -1.42585900 | -0.44135400 | -0.00026400 |
| H     | -1.12962800 | -1.49079300 | -0.00046300 |
| C     | -2.88083700 | -0.22565100 | -0.00033800 |
| O     | -3.41151400 | 0.87547000  | 0.00024800  |
| C     | 0.97509400  | 0.15038600  | 0.00001700  |
| C     | 1.38968600  | -1.19789700 | 0.00039000  |
| C     | 1.98888400  | 1.12537700  | -0.00032200 |
| C     | 2.73370800  | -1.54757300 | 0.00041000  |
| H     | 0.65400200  | -2.00214300 | 0.00071500  |

|   |             |             |             |
|---|-------------|-------------|-------------|
| C | 3.33880600  | 0.77783000  | -0.00031100 |
| H | 1.73796800  | 2.18507300  | -0.00063800 |
| C | 3.72114200  | -0.56031100 | 0.00005300  |
| H | 3.01363500  | -2.60360000 | 0.00071800  |
| H | 4.09495500  | 1.56626400  | -0.00059500 |
| H | 4.77837800  | -0.83541200 | 0.00007000  |
| C | -3.71277700 | -1.48525500 | -0.00015500 |
| H | -3.47723500 | -2.09905500 | -0.88410100 |
| H | -3.47708300 | -2.09886500 | 0.88388700  |
| H | -4.77950200 | -1.23044100 | -0.00006900 |
| C | -0.85435300 | 1.97314100  | 0.00017700  |
| H | -1.48385500 | 2.19823200  | -0.87199500 |
| H | -1.48404200 | 2.19791900  | 0.87229800  |
| H | -0.00098500 | 2.65550200  | 0.00040800  |

**HCl**

```
=====
```

|    |            |            |             |
|----|------------|------------|-------------|
| Cl | 0.00000000 | 0.00000000 | 0.07156800  |
| H  | 0.00000000 | 0.00000000 | -1.21665500 |

**INTA1**

```
=====
```

|    |             |             |             |
|----|-------------|-------------|-------------|
| C  | -2.94668800 | -0.03745300 | -0.09223200 |
| C  | -2.39314900 | -1.00432800 | 0.72834600  |
| H  | -3.06319300 | -1.62499900 | 1.32246100  |
| C  | -1.02143600 | -1.32448500 | 0.86018000  |
| O  | -0.11272000 | -0.67106800 | 0.24895100  |
| C  | -4.39690100 | 0.16901600  | -0.04131500 |
| C  | -5.10370000 | 0.59191000  | -1.18398800 |
| C  | -5.11850800 | -0.05821400 | 1.14858300  |
| C  | -6.48334800 | 0.75612600  | -1.14391600 |
| H  | -4.57614400 | 0.75801300  | -2.12428000 |
| C  | -6.49286600 | 0.13439400  | 1.19182900  |
| H  | -4.59003500 | -0.34778300 | 2.05852300  |
| C  | -7.18068800 | 0.53448300  | 0.04406200  |
| H  | -7.01793100 | 1.06198200  | -2.04553100 |
| H  | -7.03250300 | -0.02352600 | 2.12786500  |
| H  | -8.26302000 | 0.67837900  | 0.07783500  |
| C  | -0.58824900 | -2.45153100 | 1.72015600  |
| H  | 0.11939100  | -2.07174400 | 2.47488300  |
| H  | -1.42972700 | -2.95999700 | 2.20132000  |
| H  | -0.01273800 | -3.15796900 | 1.09928100  |
| Nb | 1.79031600  | -0.25904900 | -0.24887600 |
| S  | 1.10103900  | 1.95160100  | 0.30182900  |
| C  | 2.50497000  | 3.11362500  | 0.47655300  |

|    |             |             |             |
|----|-------------|-------------|-------------|
| H  | 3.17328700  | 2.95343400  | -0.38130200 |
| H  | 2.04870200  | 4.10969400  | 0.37939000  |
| C  | 3.23558700  | 2.96794100  | 1.79420500  |
| H  | 4.03110200  | 3.72732300  | 1.85470300  |
| H  | 2.55758300  | 3.11499400  | 2.64791900  |
| H  | 3.69799100  | 1.97526100  | 1.88688500  |
| Cl | 1.12925700  | -0.11682300 | -2.52514100 |
| Cl | 3.94595900  | 0.42288300  | -0.76262900 |
| Cl | 2.46761500  | -0.73359400 | 1.98981500  |
| Cl | 2.14159900  | -2.60785200 | -0.66571300 |
| C  | -2.13379100 | 0.79369800  | -1.01832800 |
| H  | -1.45783300 | 1.43371500  | -0.42621400 |
| H  | -1.47616600 | 0.17975300  | -1.65002300 |
| H  | -2.74932700 | 1.44788600  | -1.64312800 |

**TS<sub>A1-B1</sub>**

|       |             |             |             |
|-------|-------------|-------------|-------------|
| ===== |             |             |             |
| C     | 1.99101700  | -1.23932600 | 0.40980600  |
| C     | 1.41134000  | -1.90777600 | -0.70933700 |
| H     | 2.06529400  | -2.18494200 | -1.53808500 |
| C     | 0.07386900  | -2.18300700 | -0.87914300 |
| O     | -0.82738400 | -1.62961200 | -0.10143600 |
| C     | 3.30230600  | -0.59778800 | 0.23203900  |
| C     | 4.18371500  | -0.42865800 | 1.31379600  |
| C     | 3.68763100  | -0.11552700 | -1.03346300 |
| C     | 5.41606100  | 0.19074200  | 1.13121600  |
| H     | 3.91595600  | -0.79569400 | 2.30493200  |
| C     | 4.91346900  | 0.51093300  | -1.21117700 |
| H     | 3.00431700  | -0.21078100 | -1.87982300 |
| C     | 5.78309200  | 0.66392300  | -0.12832200 |
| H     | 6.09406500  | 0.30566700  | 1.97939500  |
| H     | 5.19210600  | 0.88874300  | -2.19704900 |
| H     | 6.74787600  | 1.15696600  | -0.26759800 |
| C     | -0.46212300 | -2.99848500 | -1.99873700 |
| H     | -1.09273300 | -2.36531000 | -2.64251800 |
| H     | 0.34207400  | -3.44871000 | -2.59169500 |
| H     | -1.10636700 | -3.79085700 | -1.58741300 |
| Nb    | -1.76112700 | 0.06486200  | 0.14901900  |
| S     | 0.51794000  | 0.80024400  | 0.61750800  |
| C     | 1.05499100  | 2.44978200  | 0.07753200  |
| H     | 0.37922700  | 3.15040400  | 0.59353900  |
| H     | 2.05789600  | 2.56459600  | 0.51596800  |
| C     | 1.06365900  | 2.67594200  | -1.41714200 |
| H     | 1.44847500  | 3.68689000  | -1.62357200 |



|    |             |             |             |
|----|-------------|-------------|-------------|
| H  | 1.71296700  | 1.95395800  | -1.93197300 |
| H  | 0.05414200  | 2.59625100  | -1.84110400 |
| Cl | -2.11070900 | -0.53679400 | 2.40005700  |
| Cl | -2.30279400 | 2.33074300  | 0.43460200  |
| Cl | -1.49621400 | 0.36075300  | -2.19998000 |
| Cl | -4.01205200 | -0.54604000 | -0.29859600 |
| C  | 1.57175100  | -1.66446200 | 1.78362700  |
| H  | 1.77452900  | -0.90555700 | 2.54733600  |
| H  | 0.51350700  | -1.94490400 | 1.82090300  |
| H  | 2.16029300  | -2.56808900 | 2.02278700  |

**INTB1**

=====

|    |             |             |             |
|----|-------------|-------------|-------------|
| C  | 1.73065100  | 0.24893500  | -0.83498000 |
| C  | 1.29994000  | 1.68462000  | -0.74843900 |
| H  | 2.06712900  | 2.45547300  | -0.69443800 |
| C  | 0.03445000  | 2.12906700  | -0.82710800 |
| O  | -0.99741000 | 1.25506600  | -0.88835200 |
| C  | 3.18114900  | -0.01801100 | -0.43262600 |
| C  | 3.63612000  | -1.34577800 | -0.39919800 |
| C  | 4.09511100  | 0.99751200  | -0.13391800 |
| C  | 4.95396400  | -1.64777000 | -0.07209400 |
| H  | 2.94295200  | -2.16111300 | -0.61999800 |
| C  | 5.41920000  | 0.69649800  | 0.19032500  |
| H  | 3.79812100  | 2.04588300  | -0.14630500 |
| C  | 5.85491000  | -0.62468900 | 0.22515600  |
| H  | 5.27769700  | -2.69080300 | -0.04874500 |
| H  | 6.11109200  | 1.51012400  | 0.41948100  |
| H  | 6.89022900  | -0.85822300 | 0.48351700  |
| C  | -0.40231600 | 3.55219000  | -0.81667100 |
| H  | -1.04787400 | 3.73743700  | 0.05592400  |
| H  | 0.46191200  | 4.22610800  | -0.77554600 |
| H  | -0.99099800 | 3.77515000  | -1.71972200 |
| Nb | -1.89210400 | -0.14998000 | -0.06297200 |
| S  | 0.67156700  | -0.84908800 | 0.26489700  |
| C  | 1.25280400  | -0.55543700 | 1.96819300  |
| H  | 0.45844700  | -1.03224000 | 2.56386100  |
| H  | 2.15490800  | -1.17706500 | 2.06435600  |
| C  | 1.51417600  | 0.86853900  | 2.40279900  |
| H  | 1.76703800  | 0.85802900  | 3.47423300  |
| H  | 2.36486800  | 1.30557500  | 1.86504600  |
| H  | 0.63751100  | 1.51190700  | 2.26409000  |
| Cl | -1.70927500 | -1.59911100 | -1.90373500 |
| Cl | -2.09755700 | -2.02137800 | 1.36282800  |

|    |             |             |             |
|----|-------------|-------------|-------------|
| Cl | -1.88930500 | 1.15399800  | 1.90733100  |
| Cl | -4.11943900 | 0.28849800  | -0.50600200 |
| C  | 1.49969600  | -0.26205000 | -2.26762100 |
| H  | 1.73859400  | -1.33051600 | -2.36020900 |
| H  | 0.46234500  | -0.10110700 | -2.58634900 |
| H  | 2.16214700  | 0.30354700  | -2.93896800 |

**TS<sub>B1-3a</sub>**

```
=====
```

|    |             |             |             |
|----|-------------|-------------|-------------|
| C  | 1.95033400  | 0.63884300  | -0.65910000 |
| C  | 1.49183900  | 1.85427500  | 0.08698200  |
| H  | 2.22861300  | 2.53116000  | 0.51580900  |
| C  | 0.20789200  | 2.21238600  | 0.20607500  |
| O  | -0.77300800 | 1.42324900  | -0.33599900 |
| C  | 3.41324800  | 0.25715300  | -0.45321000 |
| C  | 3.90779400  | -0.88651900 | -1.10141500 |
| C  | 4.29344700  | 0.99439900  | 0.34493100  |
| C  | 5.23379900  | -1.27937600 | -0.95464500 |
| H  | 3.24083700  | -1.49180000 | -1.71950200 |
| C  | 5.62628300  | 0.60467300  | 0.48823200  |
| H  | 3.96232700  | 1.88947100  | 0.87087300  |
| C  | 6.10234600  | -0.53236900 | -0.15764900 |
| H  | 5.59004200  | -2.17621000 | -1.46645900 |
| H  | 6.29287600  | 1.20071300  | 1.11554300  |
| H  | 7.14448000  | -0.83802600 | -0.04065300 |
| C  | -0.30233800 | 3.43987600  | 0.87633600  |
| H  | -0.97408800 | 3.17235800  | 1.70629700  |
| H  | 0.52917600  | 4.03766300  | 1.26868200  |
| H  | -0.87711000 | 4.05843800  | 0.16878900  |
| Nb | -1.68115400 | -0.38381500 | -0.01129500 |
| S  | 0.96258700  | -0.86181300 | -0.10152600 |
| C  | 1.65208300  | -1.27313900 | 1.53637200  |
| H  | 1.01607900  | -2.11222500 | 1.85345800  |
| H  | 2.64500700  | -1.68668600 | 1.30616600  |
| C  | 1.72588700  | -0.18748800 | 2.58360500  |
| H  | 2.08630700  | -0.64263600 | 3.51891500  |
| H  | 2.43141300  | 0.60521300  | 2.30586700  |
| H  | 0.74711600  | 0.26705200  | 2.77979200  |
| Cl | -1.53376300 | -0.78926100 | -2.29770000 |
| Cl | -1.29116000 | -2.60031900 | 0.65395500  |
| Cl | -1.77935600 | 0.36337300  | 2.19910100  |
| Cl | -3.91405900 | -1.05600400 | 0.05192000  |
| C  | 1.65113200  | 0.79843300  | -2.15788800 |
| H  | 1.89168600  | -0.11152200 | -2.72388300 |

|    |             |            |             |
|----|-------------|------------|-------------|
| H  | 0.59737900  | 1.05130300 | -2.32618300 |
| H  | 2.27345700  | 1.62055200 | -2.54019100 |
| Cl | -3.30404700 | 2.01876500 | -0.90035100 |
| H  | -1.85755700 | 1.99629400 | -0.66730300 |

**3a**

```
=====
```

|   |             |             |             |
|---|-------------|-------------|-------------|
| C | -0.22749700 | -0.57797300 | 0.48461100  |
| C | -1.07283800 | -1.19701600 | -0.64081800 |
| H | -0.78211100 | -2.25348300 | -0.76627400 |
| C | -2.56989600 | -1.18155800 | -0.37505800 |
| O | -3.06180900 | -1.86654900 | 0.49663700  |
| C | 1.24510300  | -0.46715200 | 0.10021300  |
| C | 2.12183200  | 0.25796900  | 0.92212600  |
| C | 1.77614000  | -1.10277000 | -1.02703900 |
| C | 3.47849500  | 0.34491700  | 0.62812300  |
| H | 1.72013400  | 0.78138000  | 1.79330000  |
| C | 3.13860900  | -1.01710200 | -1.32484700 |
| H | 1.13405200  | -1.68035400 | -1.69283200 |
| C | 3.99584600  | -0.29437400 | -0.50076500 |
| H | 4.13744400  | 0.92035600  | 1.28306600  |
| H | 3.52643200  | -1.52237800 | -2.21279300 |
| H | 5.06054800  | -0.22463500 | -0.73582600 |
| C | -3.40779100 | -0.31315100 | -1.26815200 |
| H | -3.07173600 | 0.73161500  | -1.18045400 |
| H | -3.26962900 | -0.61072000 | -2.32000300 |
| H | -4.46652000 | -0.39027800 | -0.99163300 |
| S | -0.90583600 | 1.09662600  | 0.89963800  |
| C | -0.46272000 | 2.07055200  | -0.56851500 |
| H | 0.62966100  | 2.02428300  | -0.69813800 |
| H | -0.92550700 | 1.62516700  | -1.46301100 |
| C | -0.92872000 | 3.50311200  | -0.38577500 |
| H | -0.65171800 | 4.10446600  | -1.26449000 |
| H | -2.02162800 | 3.55970000  | -0.26754200 |
| H | -0.46581100 | 3.96332200  | 0.50040500  |
| C | -0.35030600 | -1.38600200 | 1.78014900  |
| H | 0.24219200  | -0.92486000 | 2.58263400  |
| H | -1.39727700 | -1.46470200 | 2.10067300  |
| H | 0.03221900  | -2.40402600 | 1.61000800  |
| H | -0.86042300 | -0.68519500 | -1.58991100 |

**References:**

1. Z. Gao and S. P. Fletcher, *Chem. Sci.*, 2017, **8**, 641–646.
2. M. J. Frisch, G. W. Trucks, H. B. Schlegel, G. E. Scuseria, M. A. Robb, J. R. Cheeseman, G. Scalmani, V. Barone, G. A. Petersson, H. Nakatsuji, X. Li, M. Caricato, A. V. Marenich, J. Bloino, B. G. Janesko, R. Gomperts, B. Mennucci, H. P. Hratchian, J. V. Ortiz, A. F. Izmaylov, J. L. Sonnenberg, Williams, F. Ding, F. Lipparini, F. Egidi, J. Goings, B. Peng, A. Petrone, T. Henderson, D. Ranasinghe, V. G. Zakrzewski, J. Gao, N. Rega, G. Zheng, W. Liang, M. Hada, M. Ehara, K. Toyota, R. Fukuda, J. Hasegawa, M. Ishida, T. Nakajima, Y. Honda, O. Kitao, H. Nakai, T. Vreven, K. Throssell, J. A. Montgomery Jr., J. E. Peralta, F. Ogliaro, M. J. Bearpark, J. J. Heyd, E. N. Brothers, K. N. Kudin, V. N. Staroverov, T. A. Keith, R. Kobayashi, J. Normand, K. Raghavachari, A. P. Rendell, J. C. Burant, S. S. Iyengar, J. Tomasi, M. Cossi, J. M. Millam, M. Klene, C. Adamo, R. Cammi, J. W. Ochterski, R. L. Martin, K. Morokuma, O. Farkas, J. B. Foresman and D. J. Fox, Gaussian, Inc., Wallingford CT, 2016.
3. S. Dohm, A. Hansen, M. Steinmetz, S. Grimme and M. P. Checinski, *Journal of Chemical Theory and Computation*, 2018, **14**, 2596-2608.
4. S. Grimme, S. Ehrlich and L. Goerigk, *J. Comput. Chem.*, 2011, **32**, 1456-1465.
5. F. Weigend, *Physical Chemistry Chemical Physics*, 2006, **8**, 1057-1065.
6. G. Scalmani and M. J. Frisch, *The Journal of Chemical Physics*, 2010, **132**, 114110.
7. F. Weigend and R. Ahlrichs, *Physical Chemistry Chemical Physics*, 2005, **7**, 3297-3305.
8. A. V. Marenich, C. J. Cramer and D. G. Truhlar, *The Journal of Physical Chemistry B*, 2009, **113**, 6378-6396.
9. C. Y. Legault, CYLview20, Université de Sherbrooke, 2020.  
(<http://www.cylview.org>)

# NMR Spectra of Compounds

<sup>1</sup>H NMR of compound **3a**

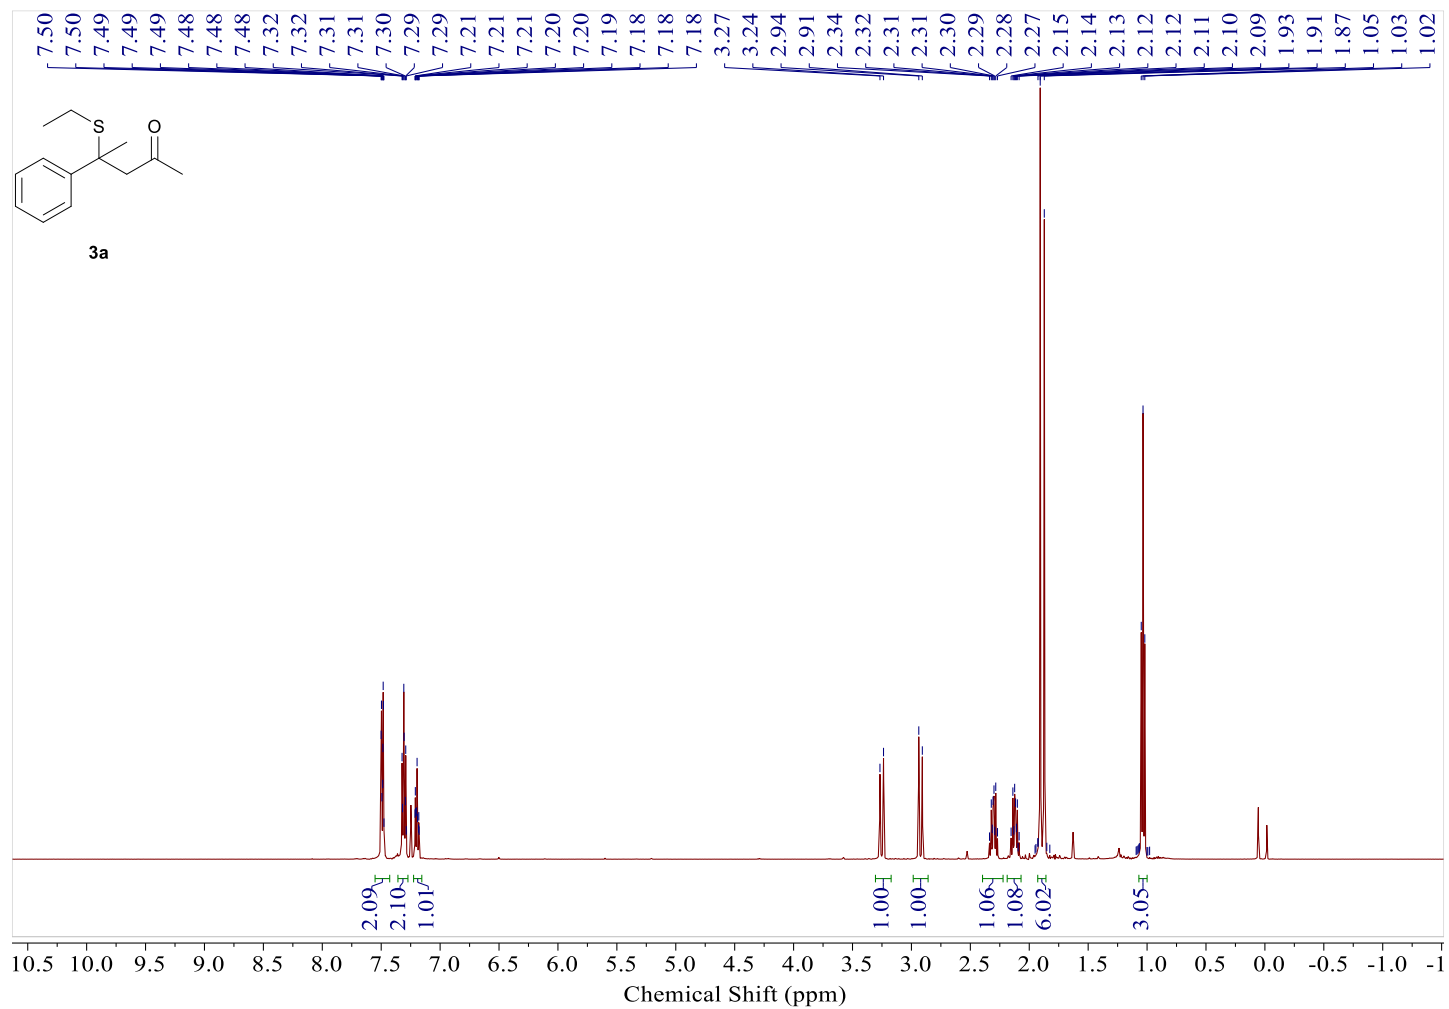

<sup>13</sup>C NMR of compound **3a**

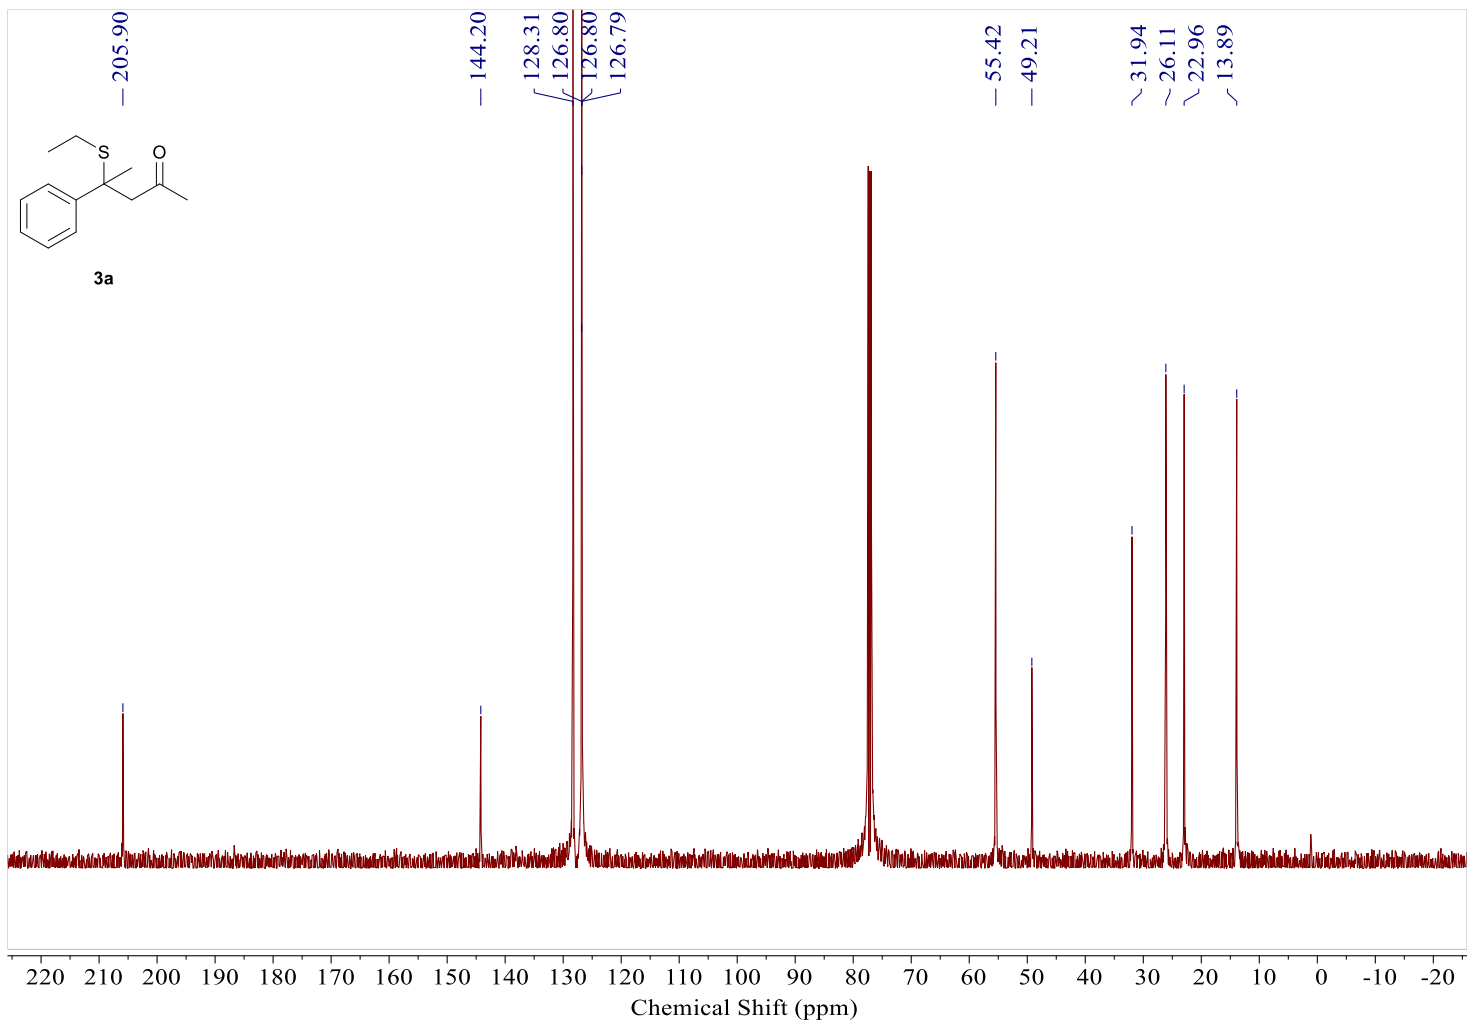

<sup>1</sup>H NMR of compound **3b**

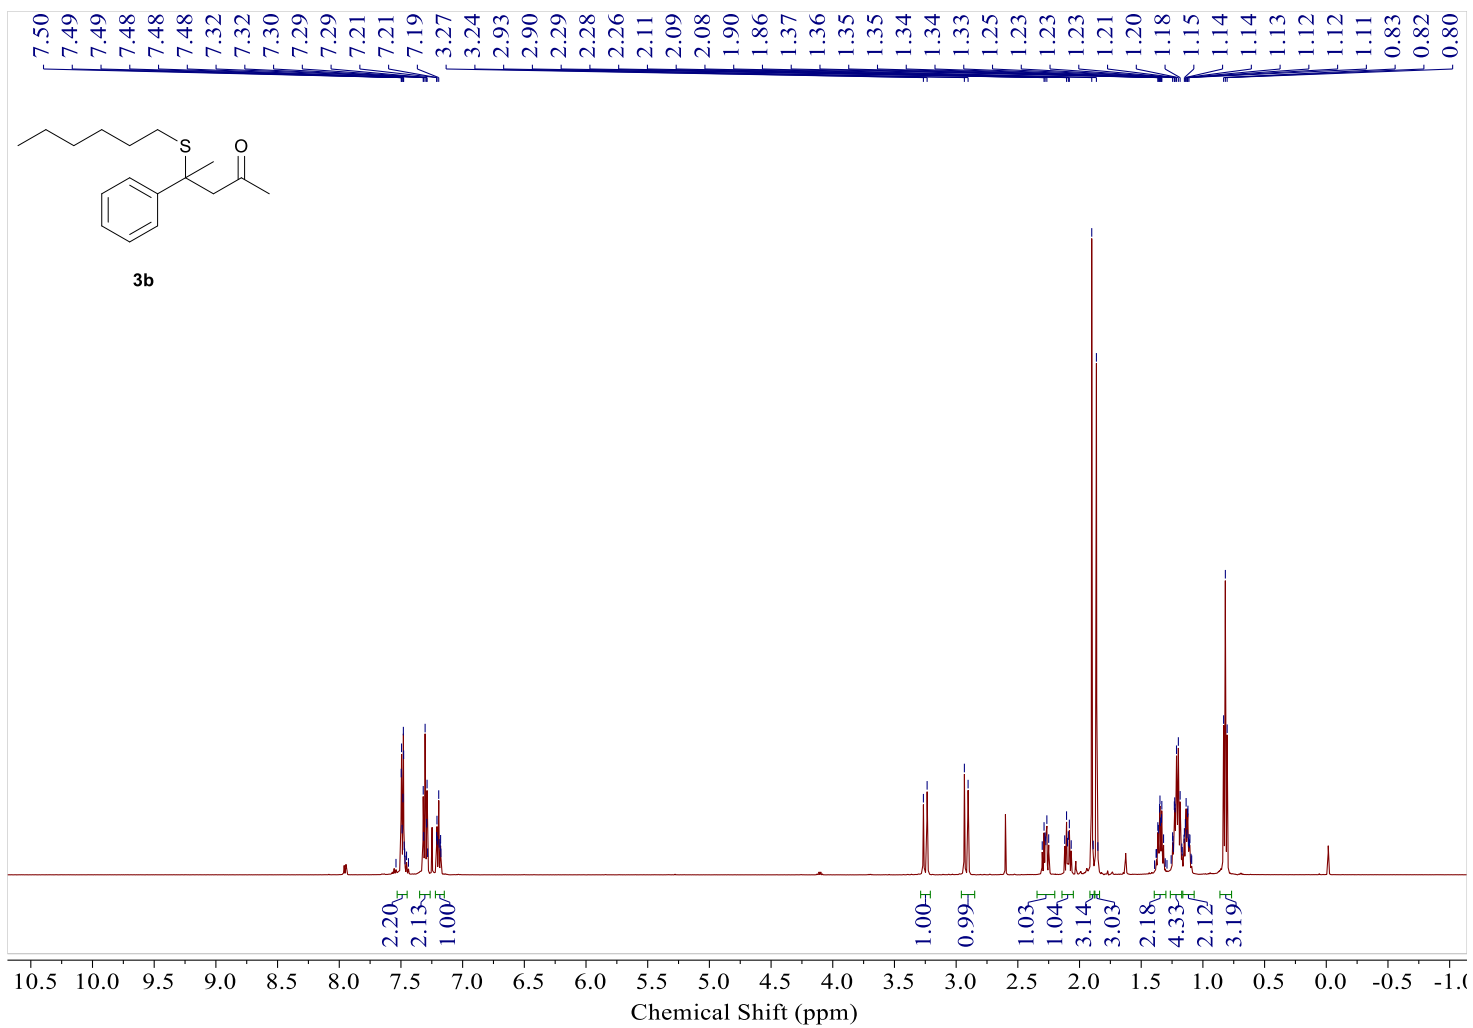

<sup>13</sup>C NMR of compound **3b**

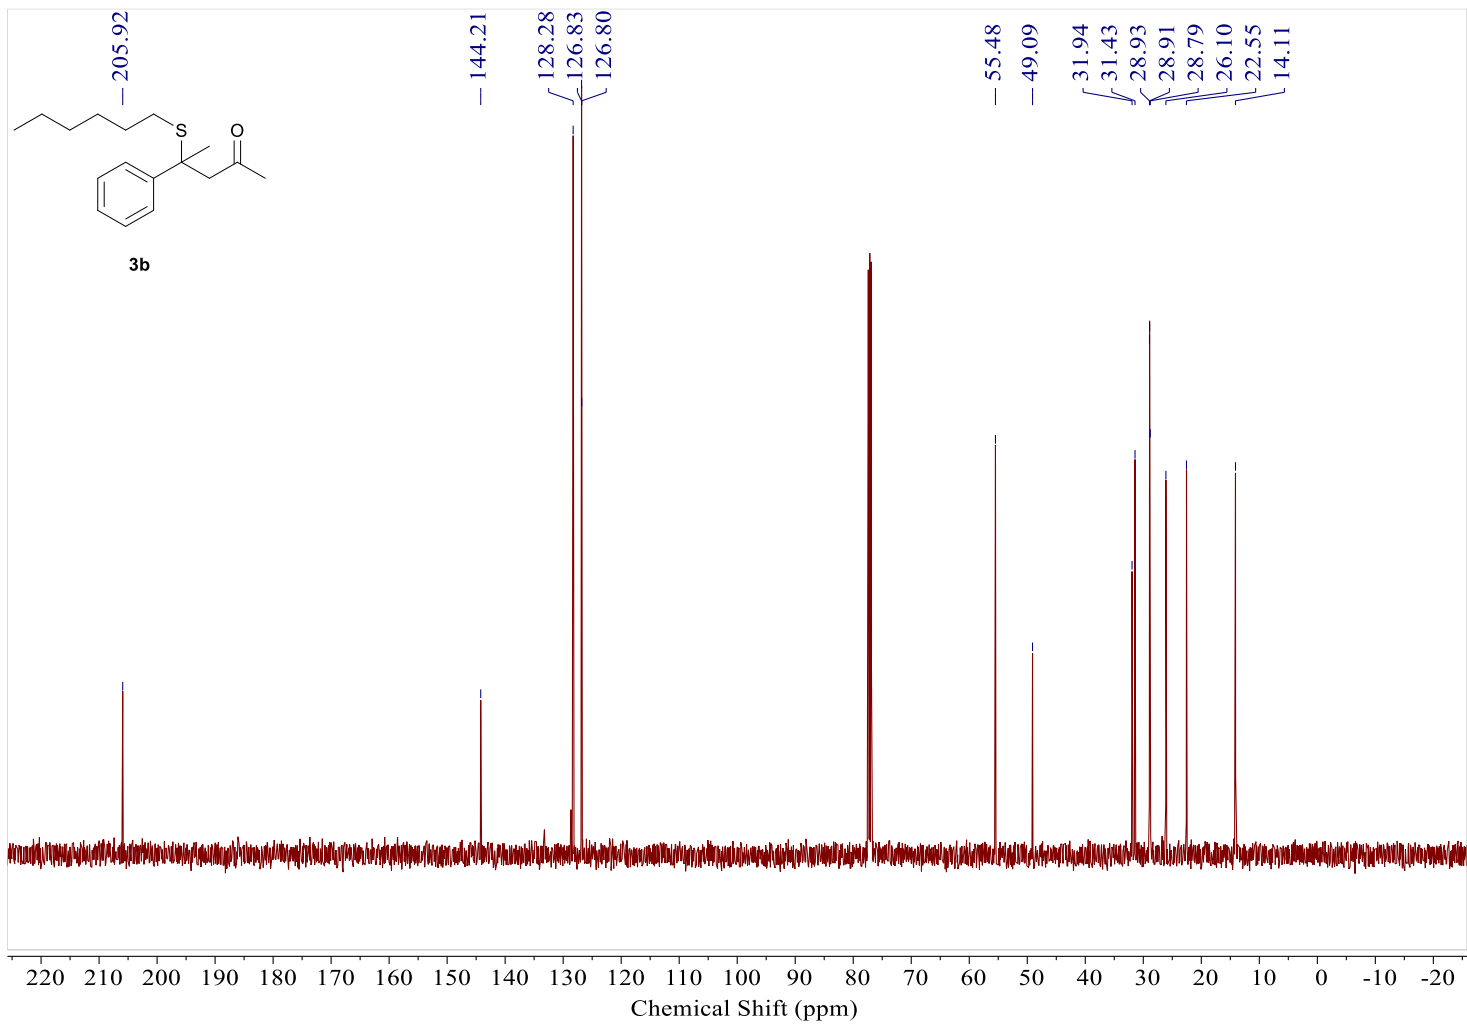



<sup>1</sup>H NMR of compound **3c**

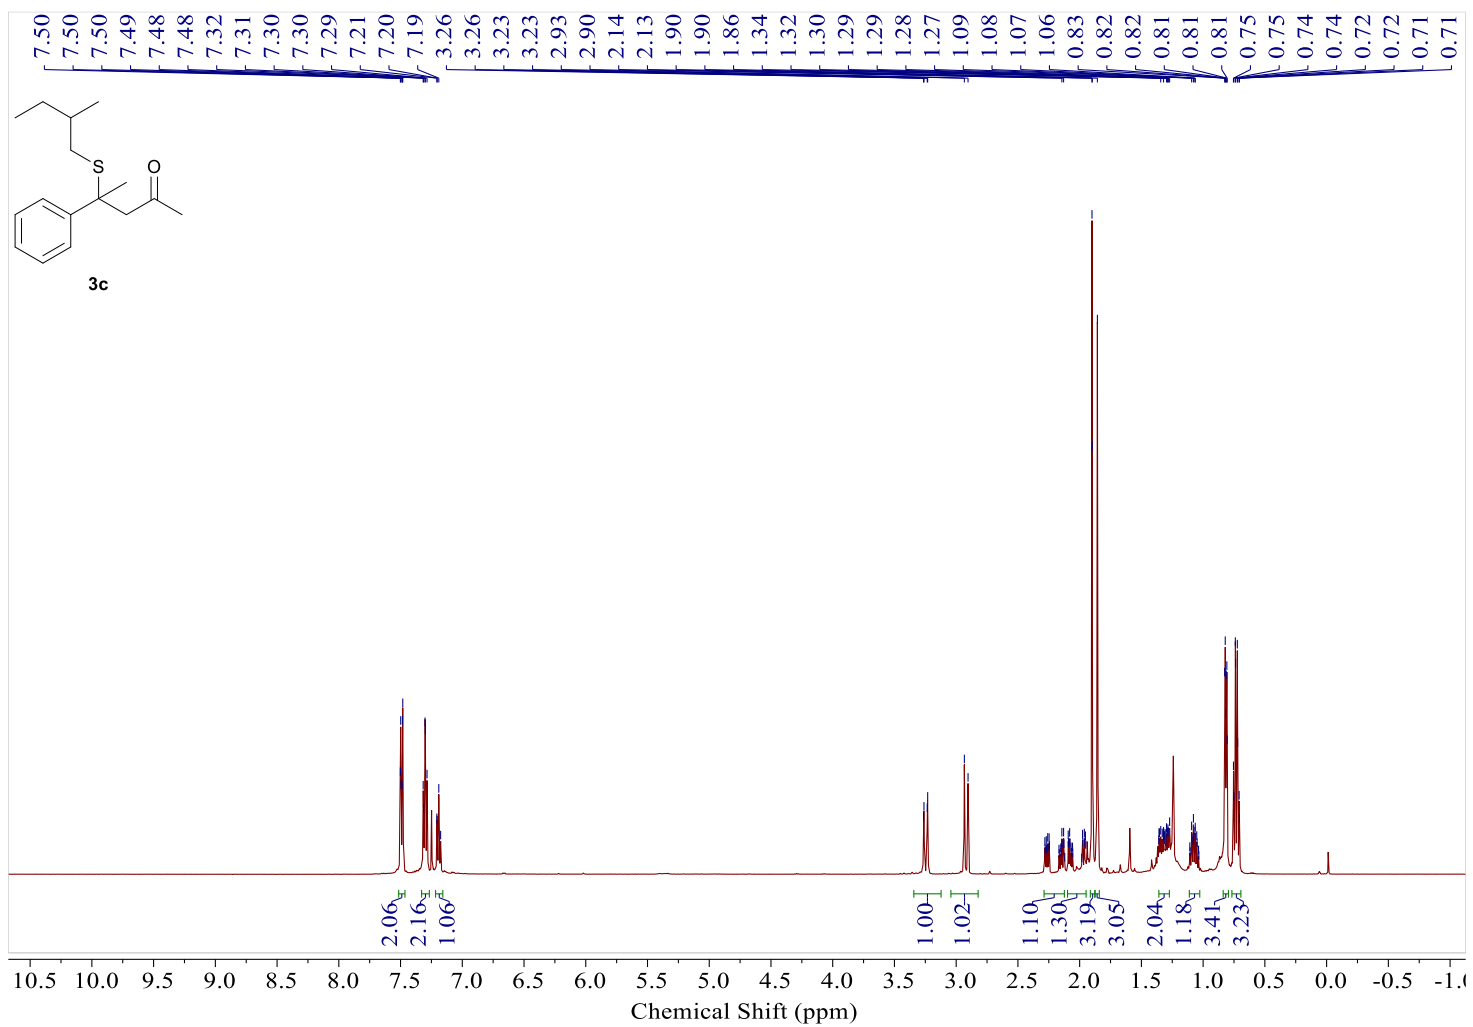

<sup>13</sup>C NMR of compound **3c**

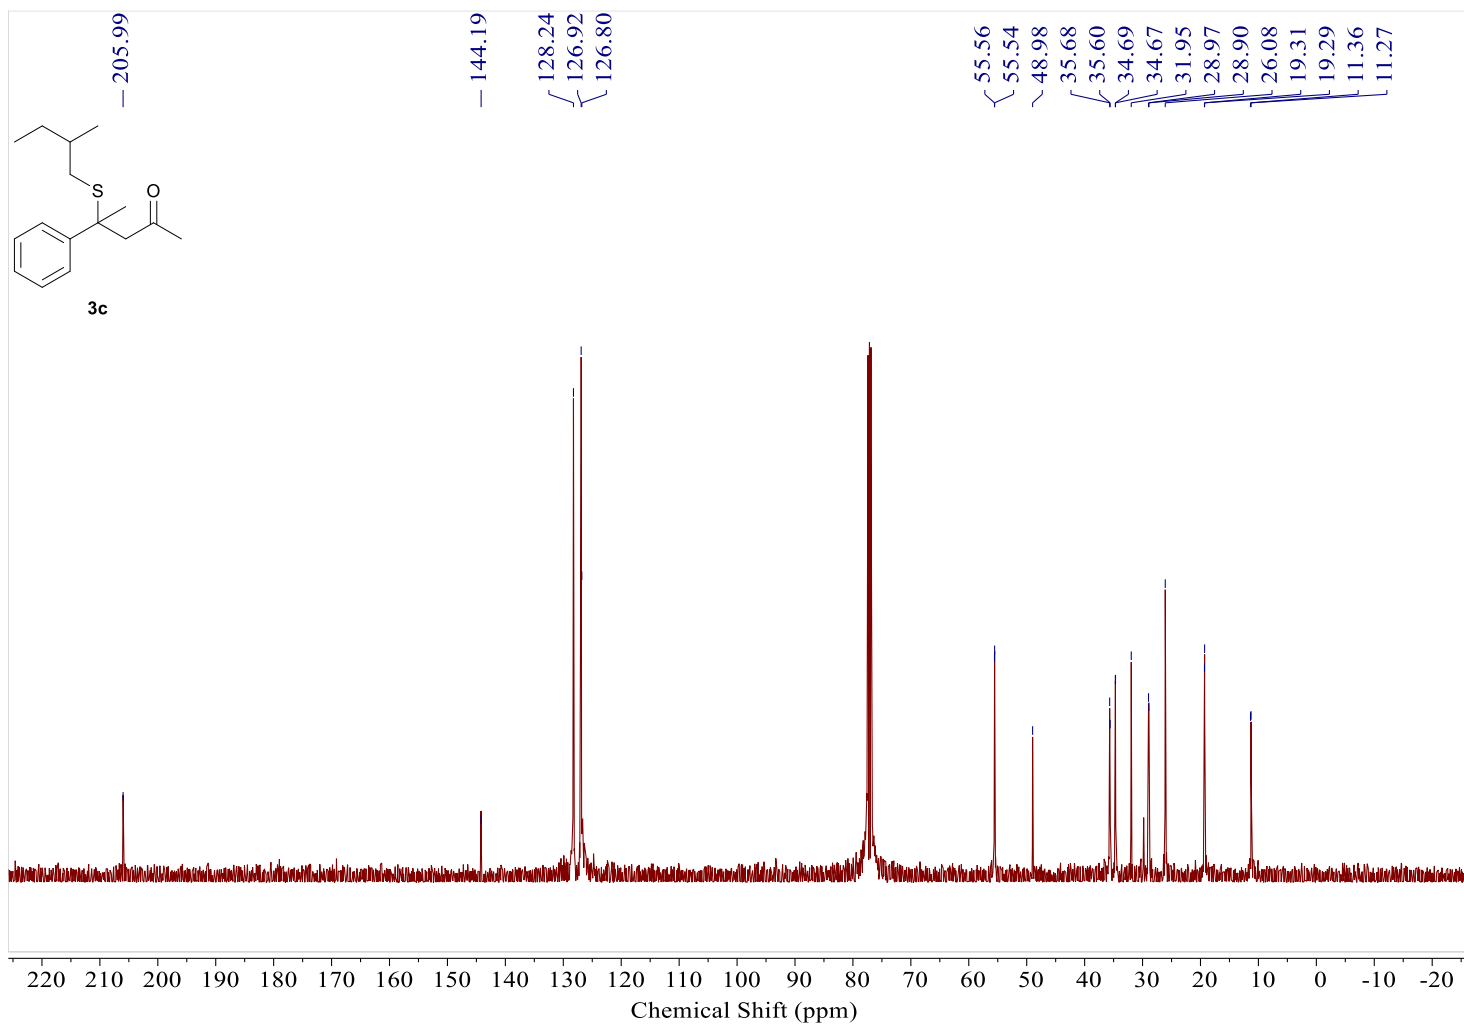

<sup>1</sup>H NMR of compound **3d**

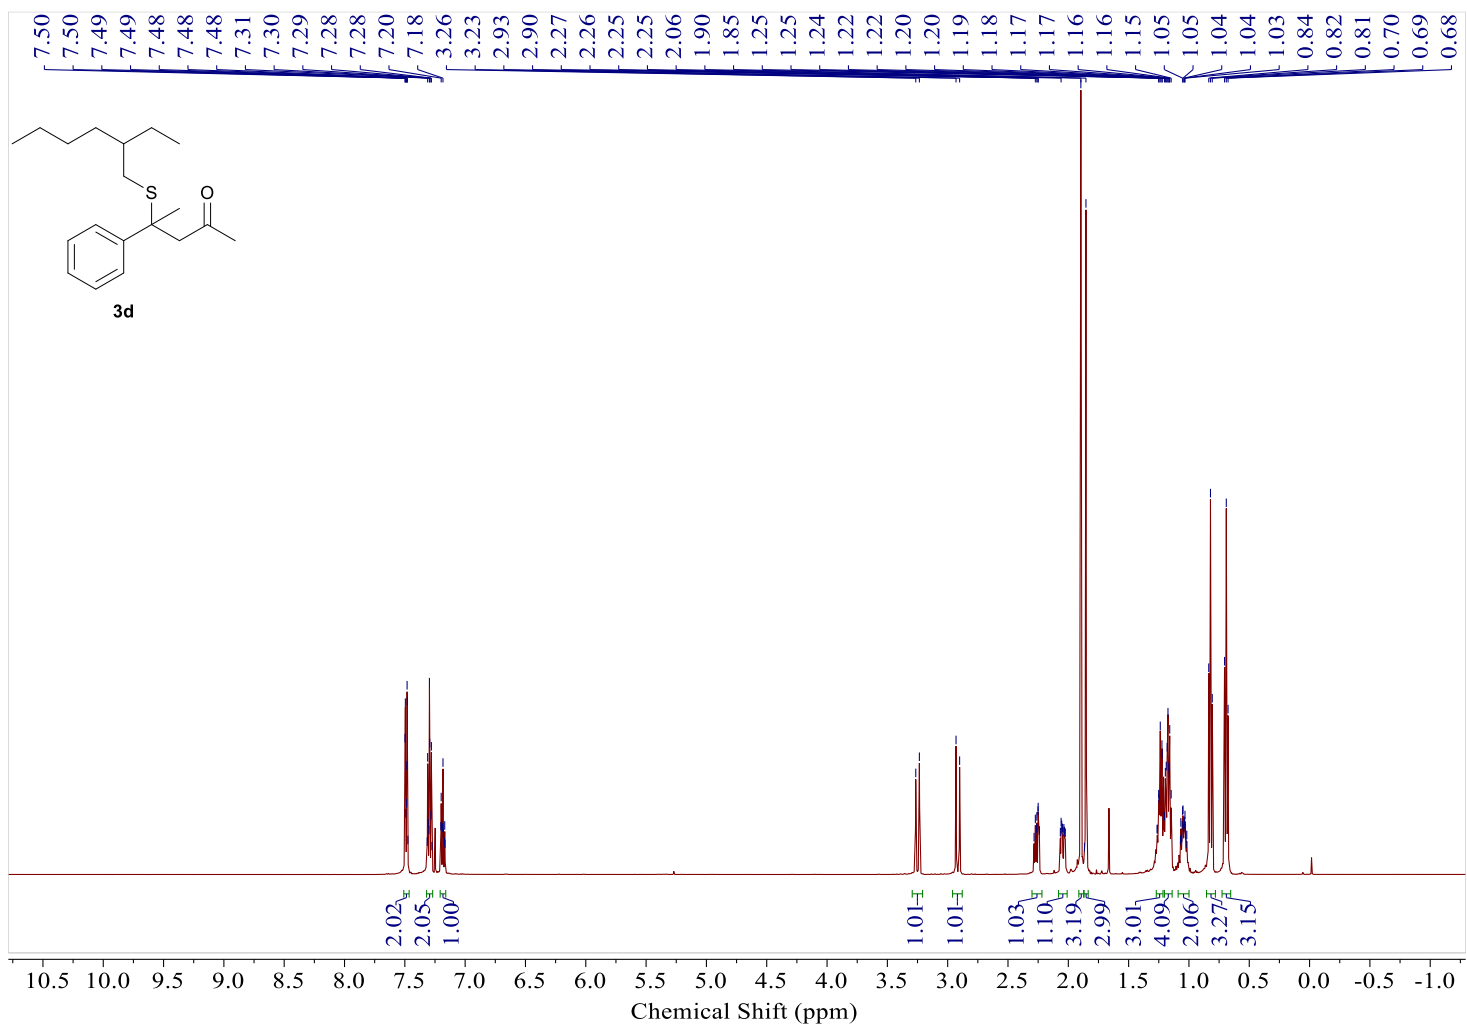

<sup>13</sup>C NMR of compound **3d**

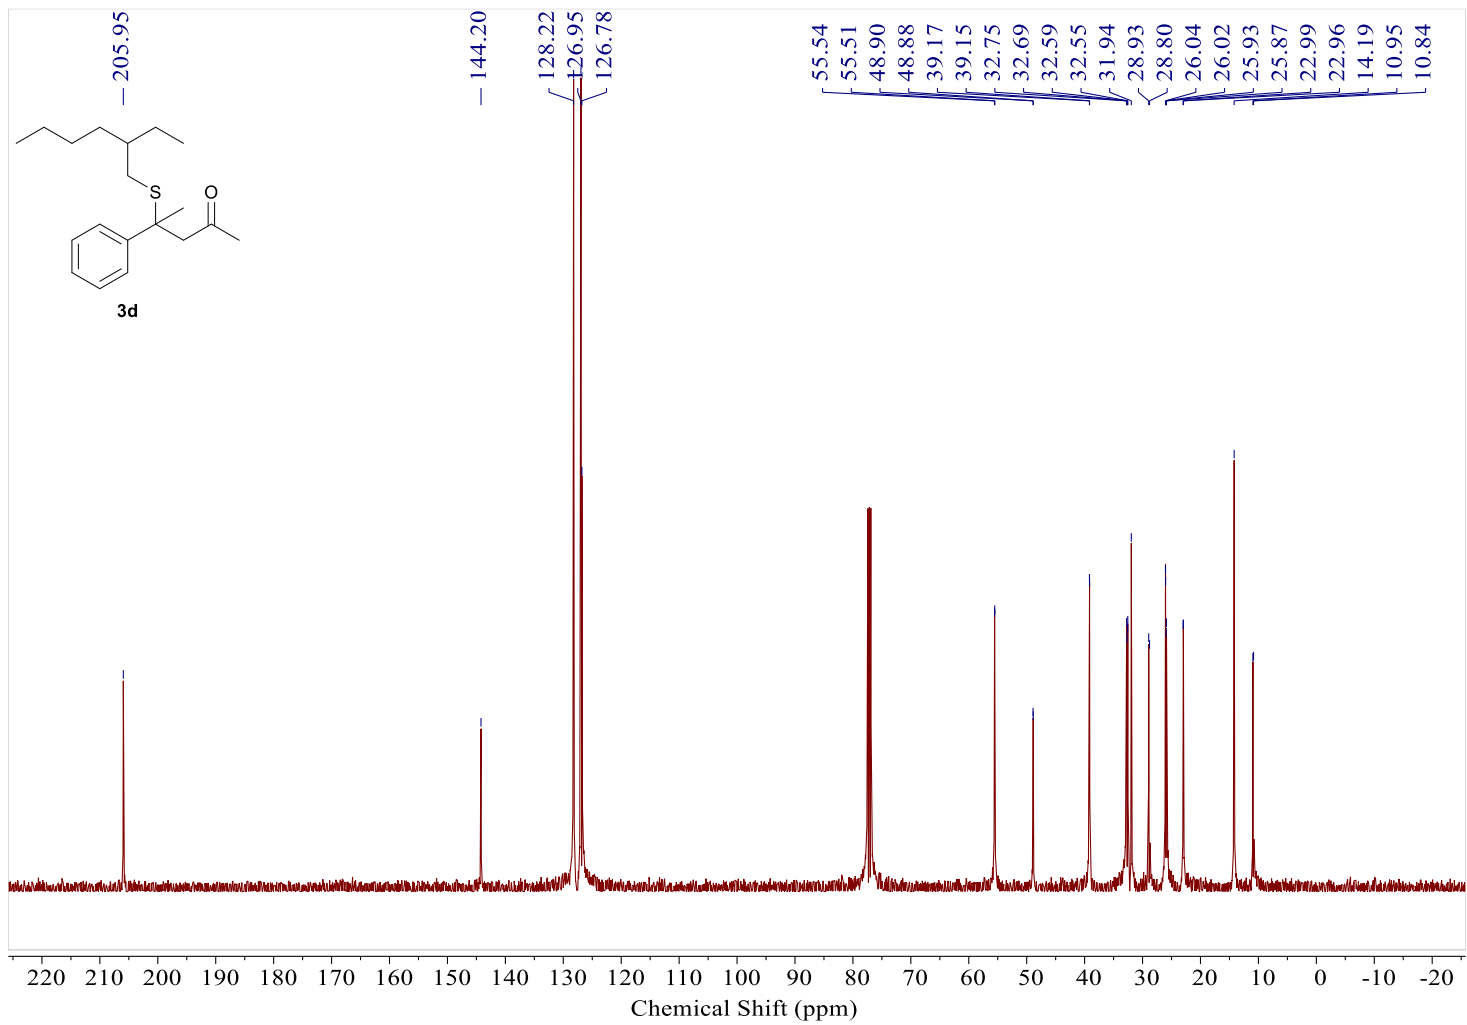

<sup>1</sup>H NMR of compound **3f**

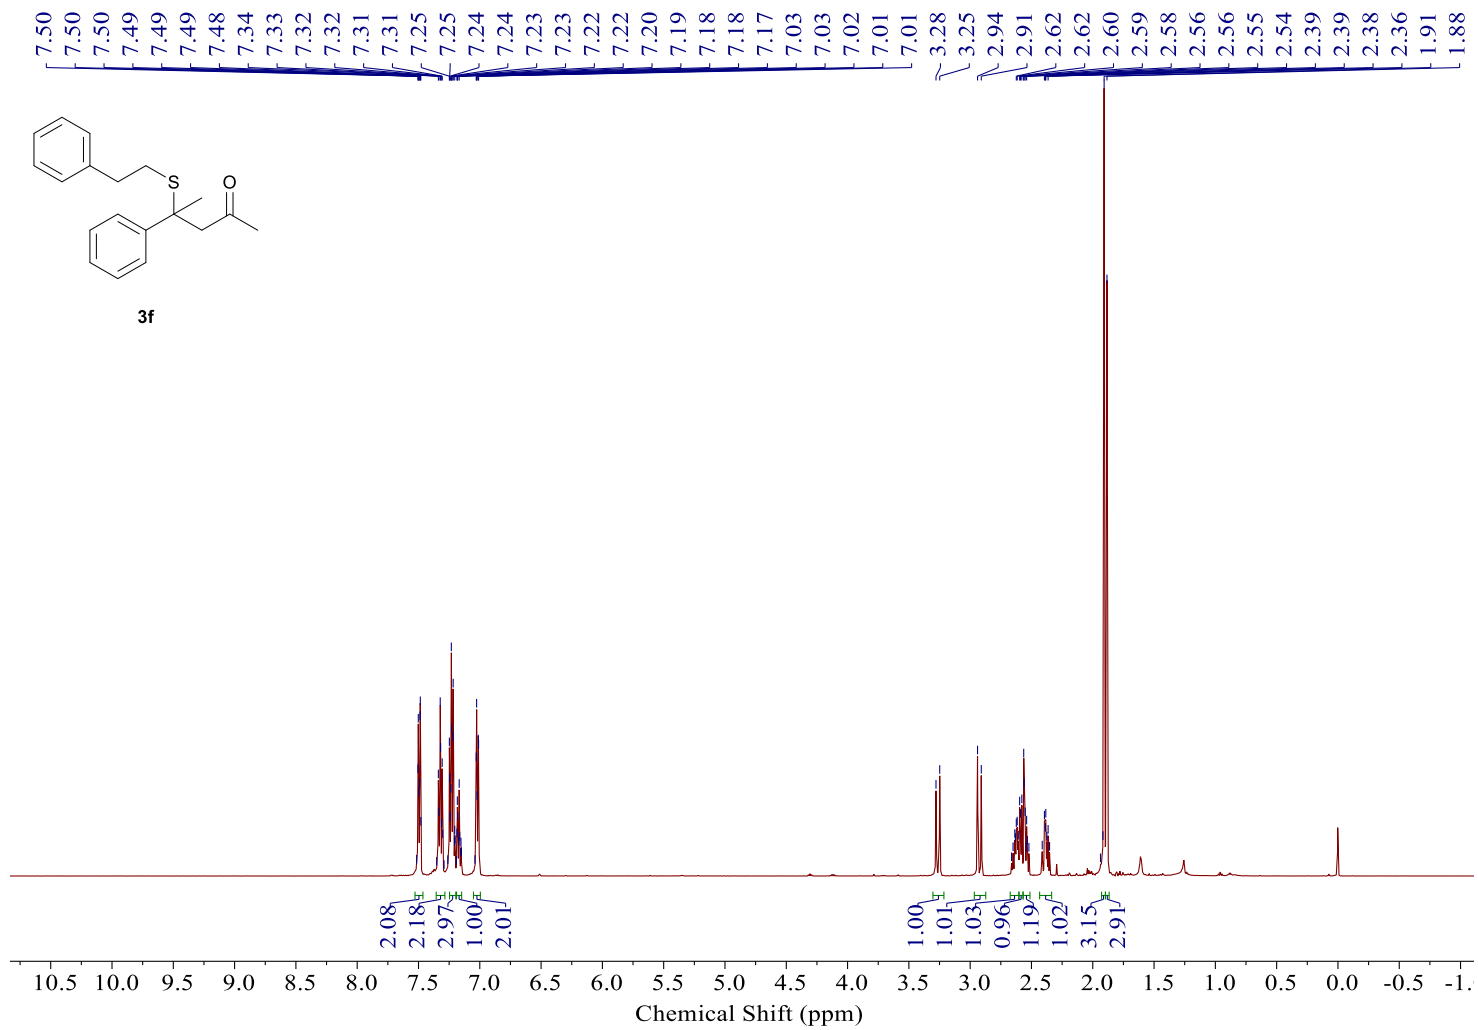

<sup>13</sup>C NMR of compound **3f**

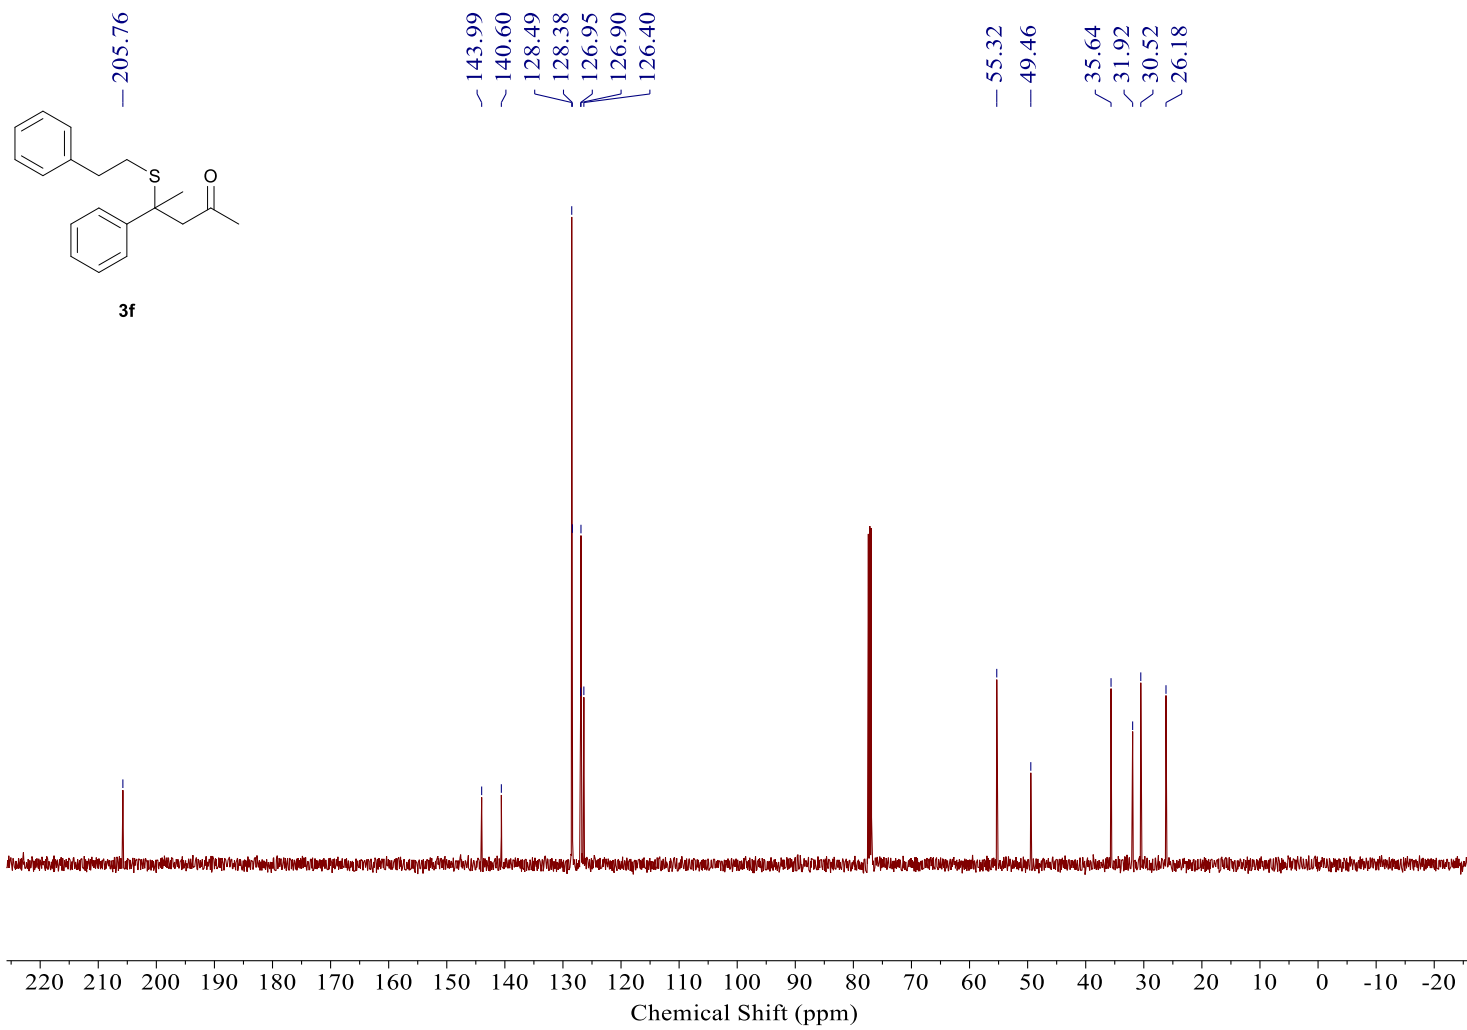

<sup>1</sup>H NMR of compound **3g**

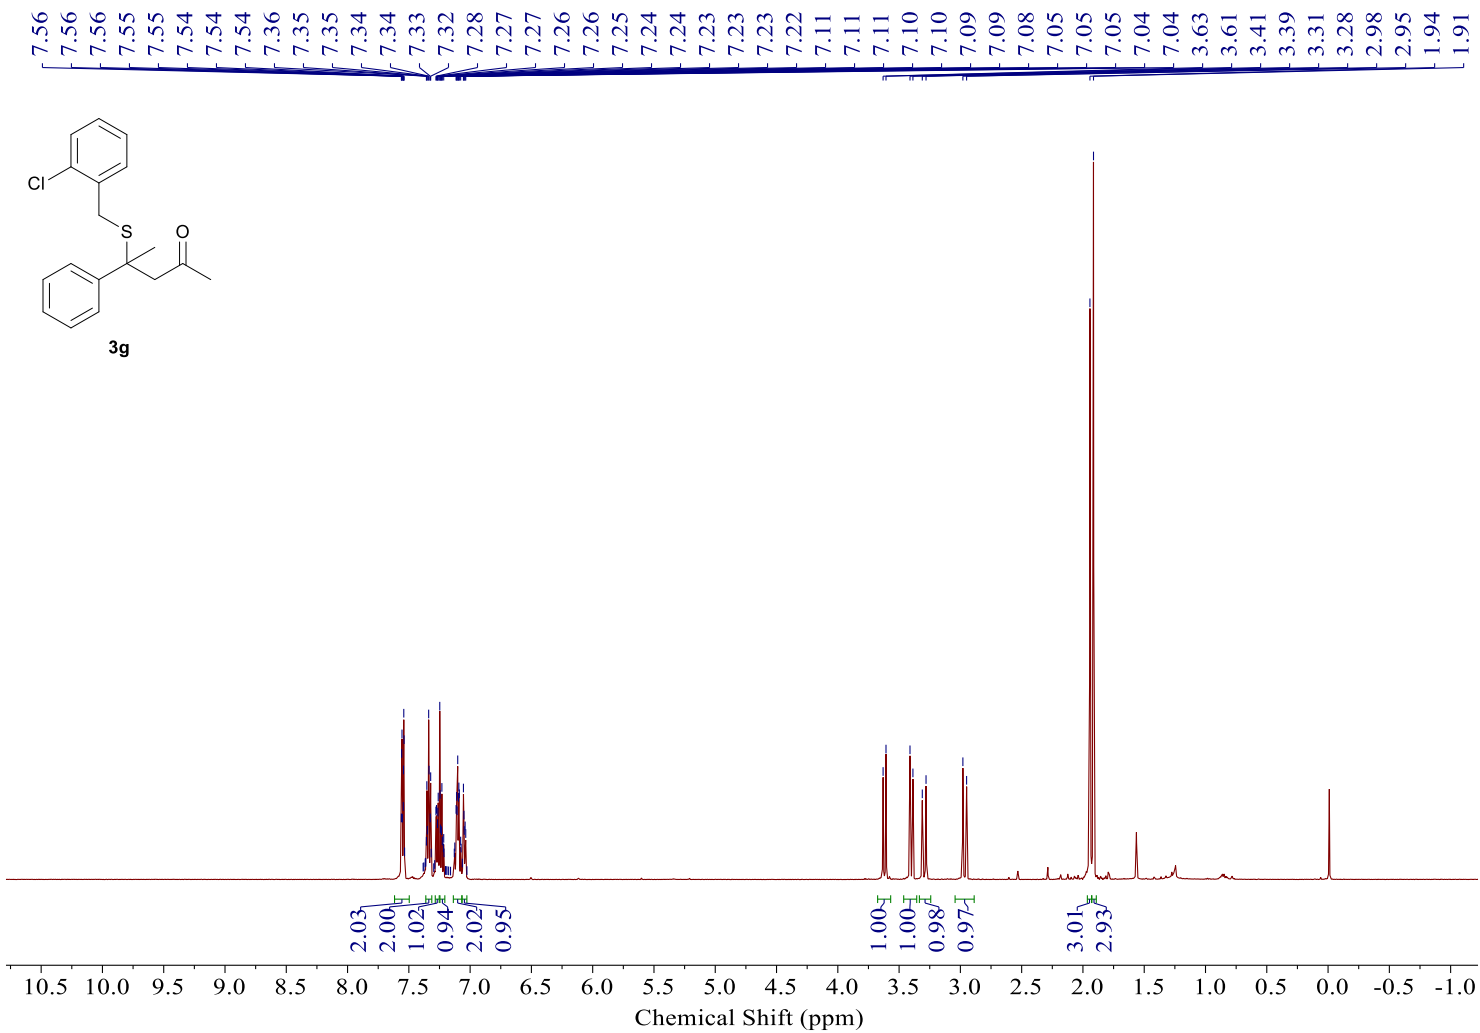

<sup>13</sup>C NMR of compound **3g**

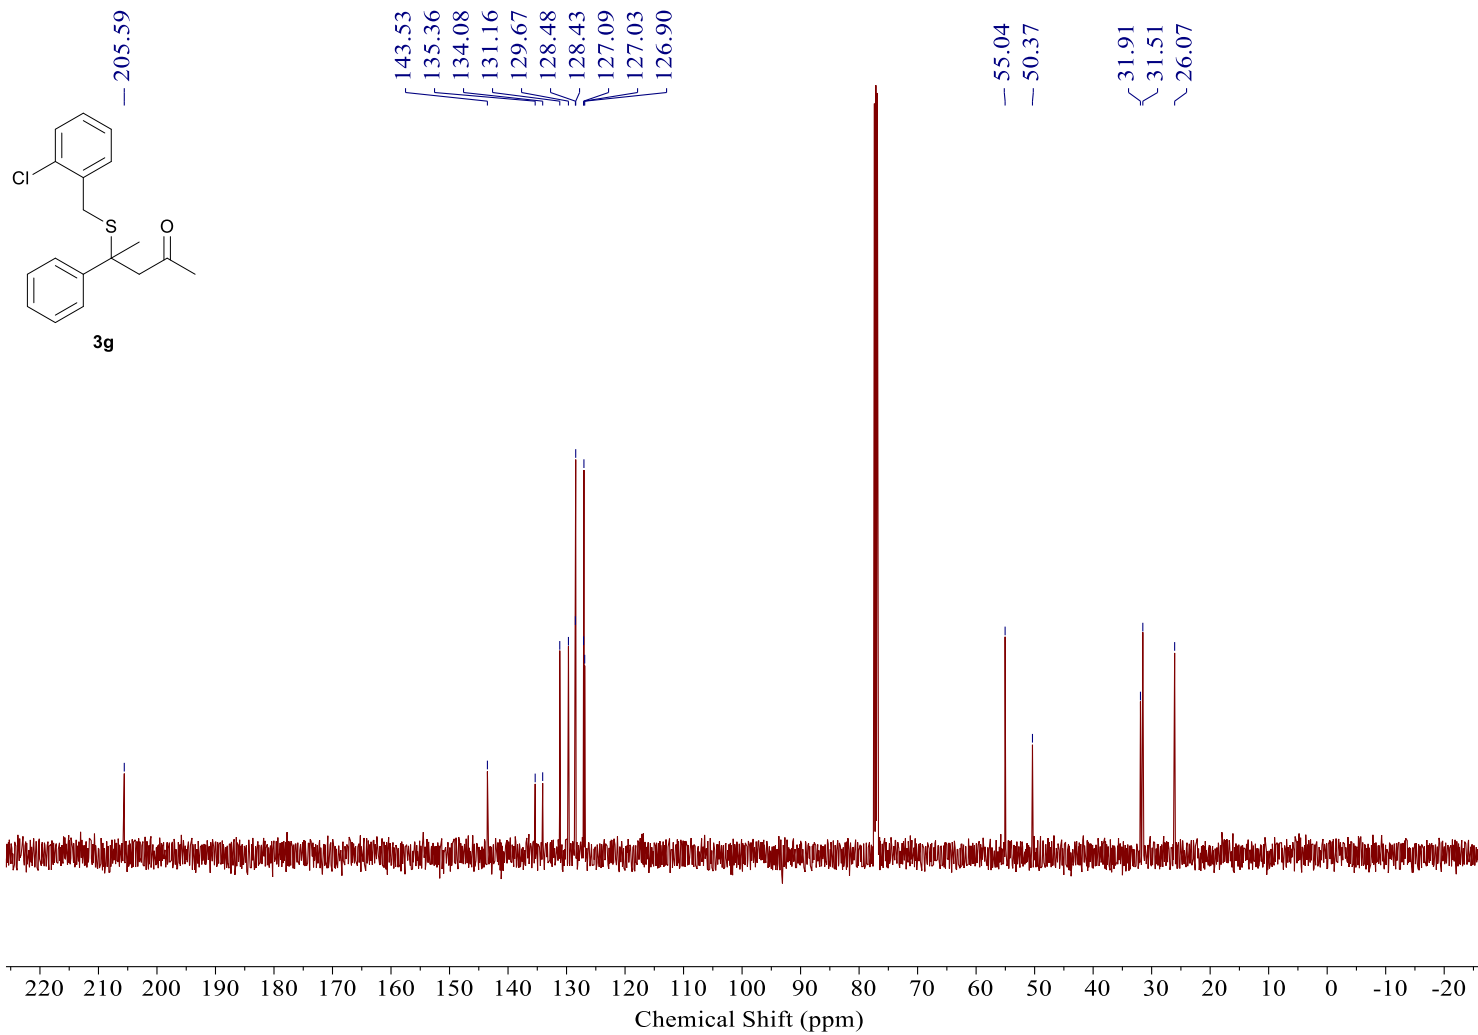



<sup>1</sup>H NMR of compound **3h**

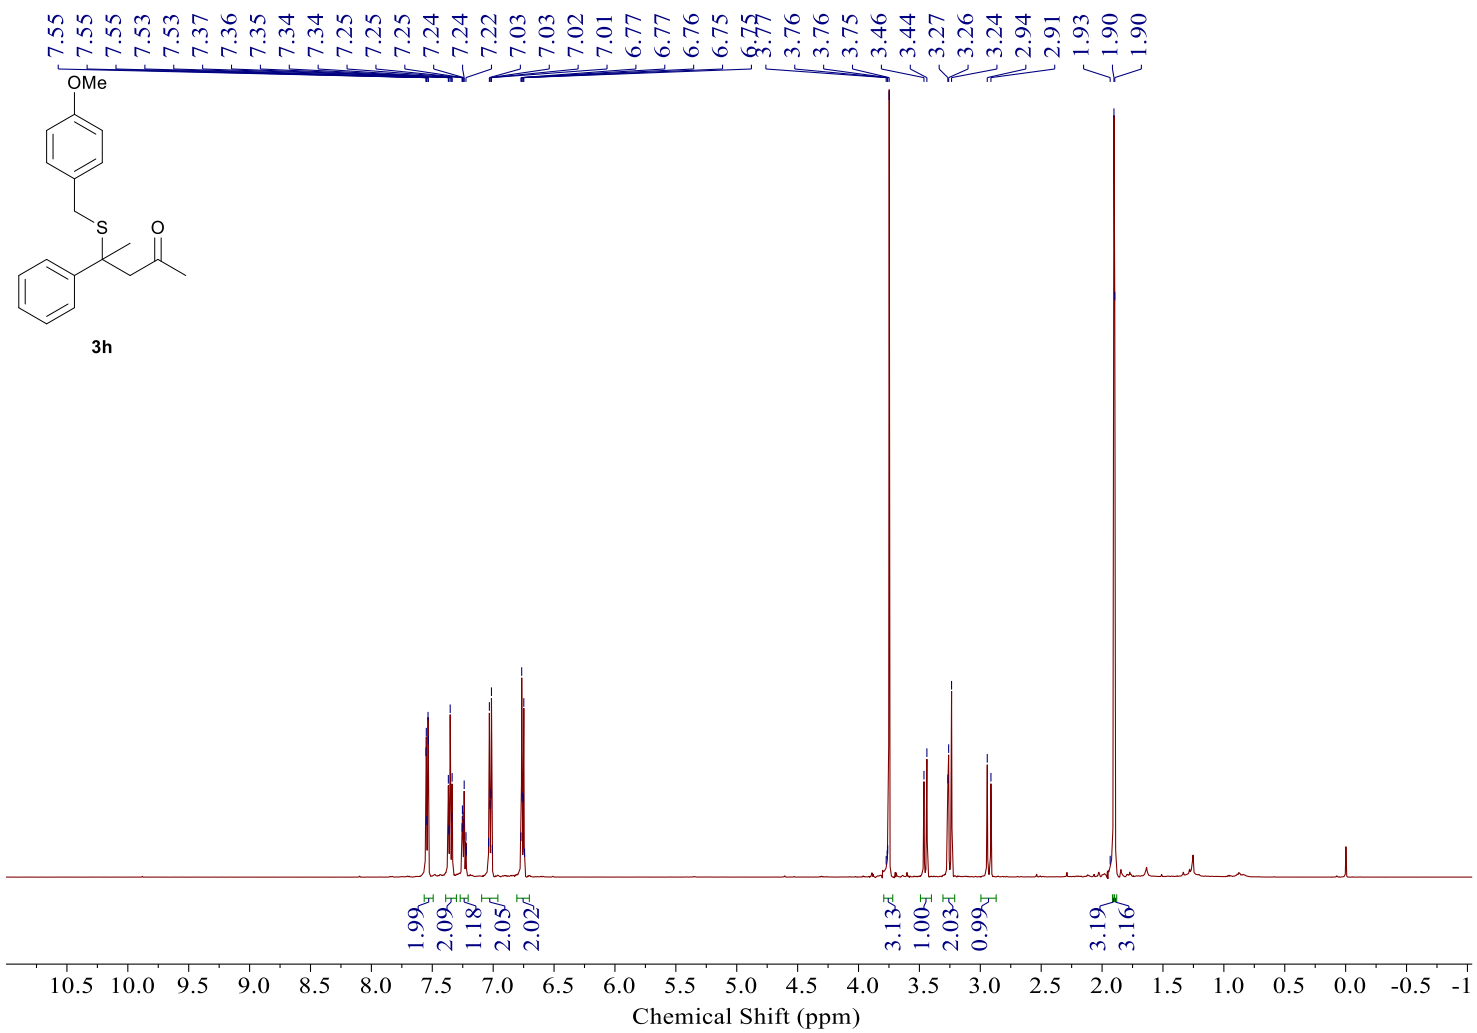

<sup>13</sup>C NMR of compound **3h**

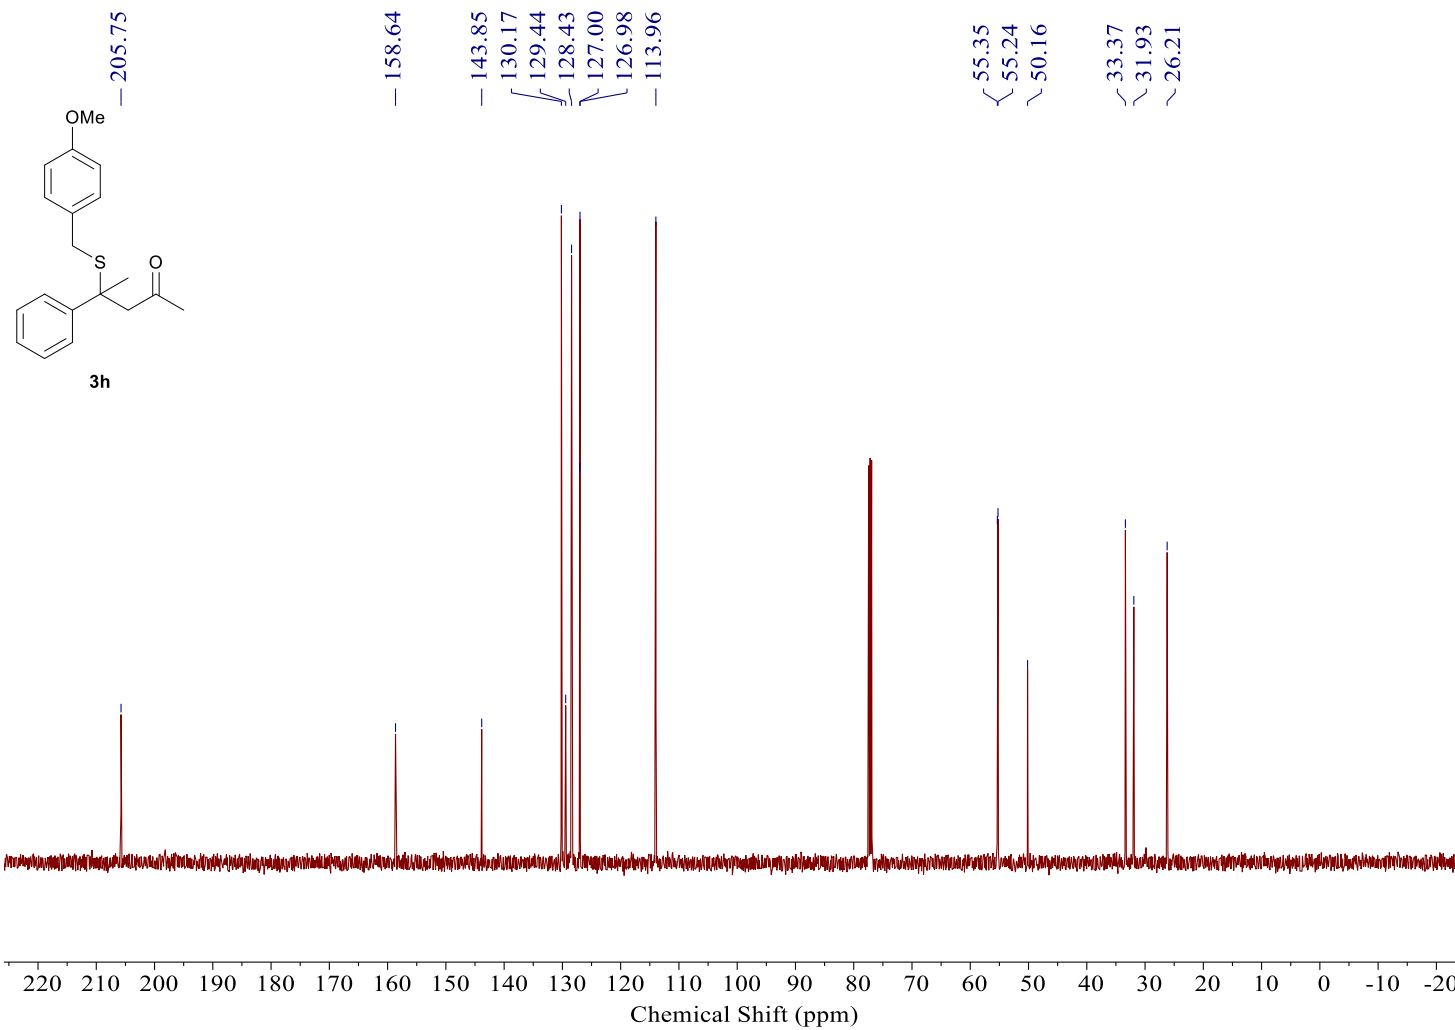

<sup>1</sup>H NMR of compound **3i**

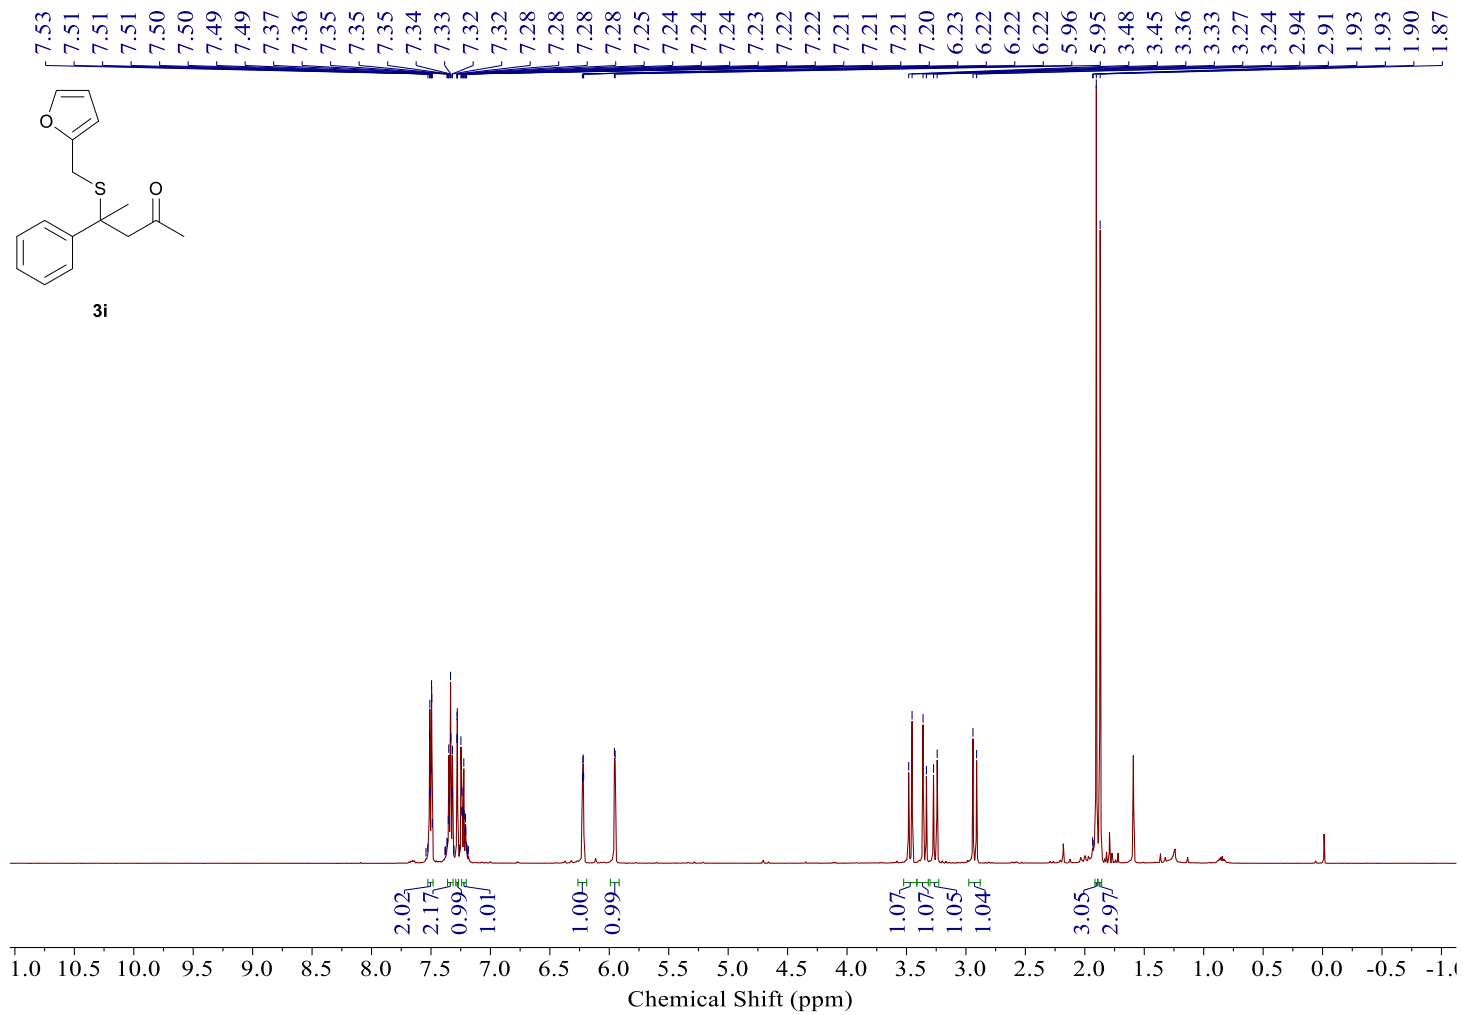

<sup>13</sup>C NMR of compound **3i**

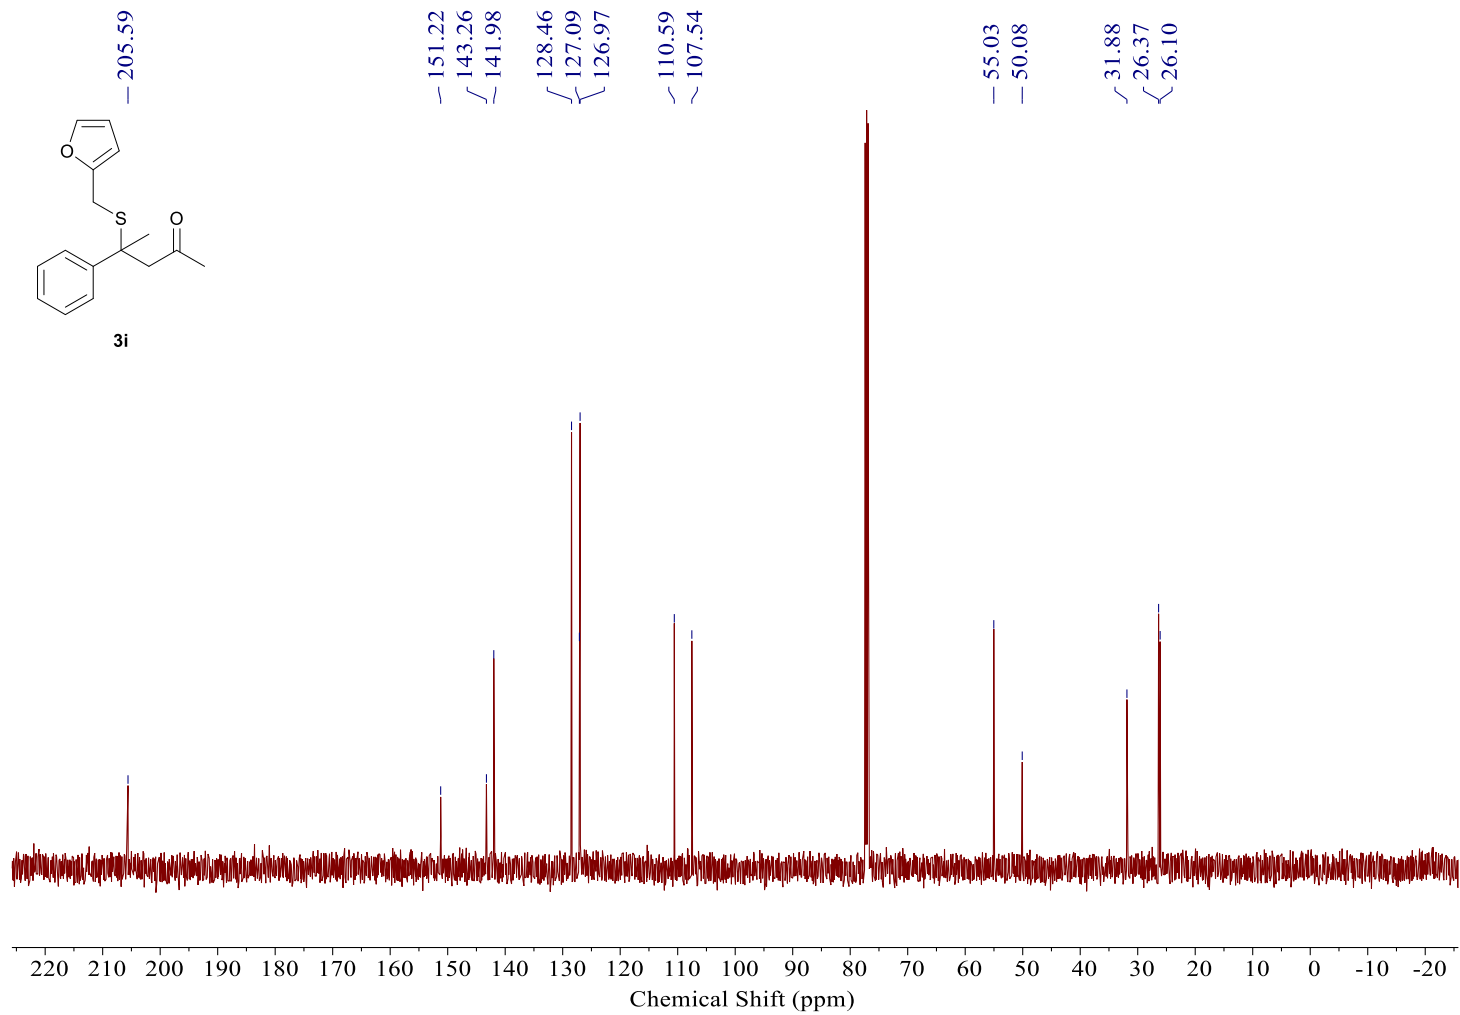

<sup>1</sup>H NMR of compound **3j**

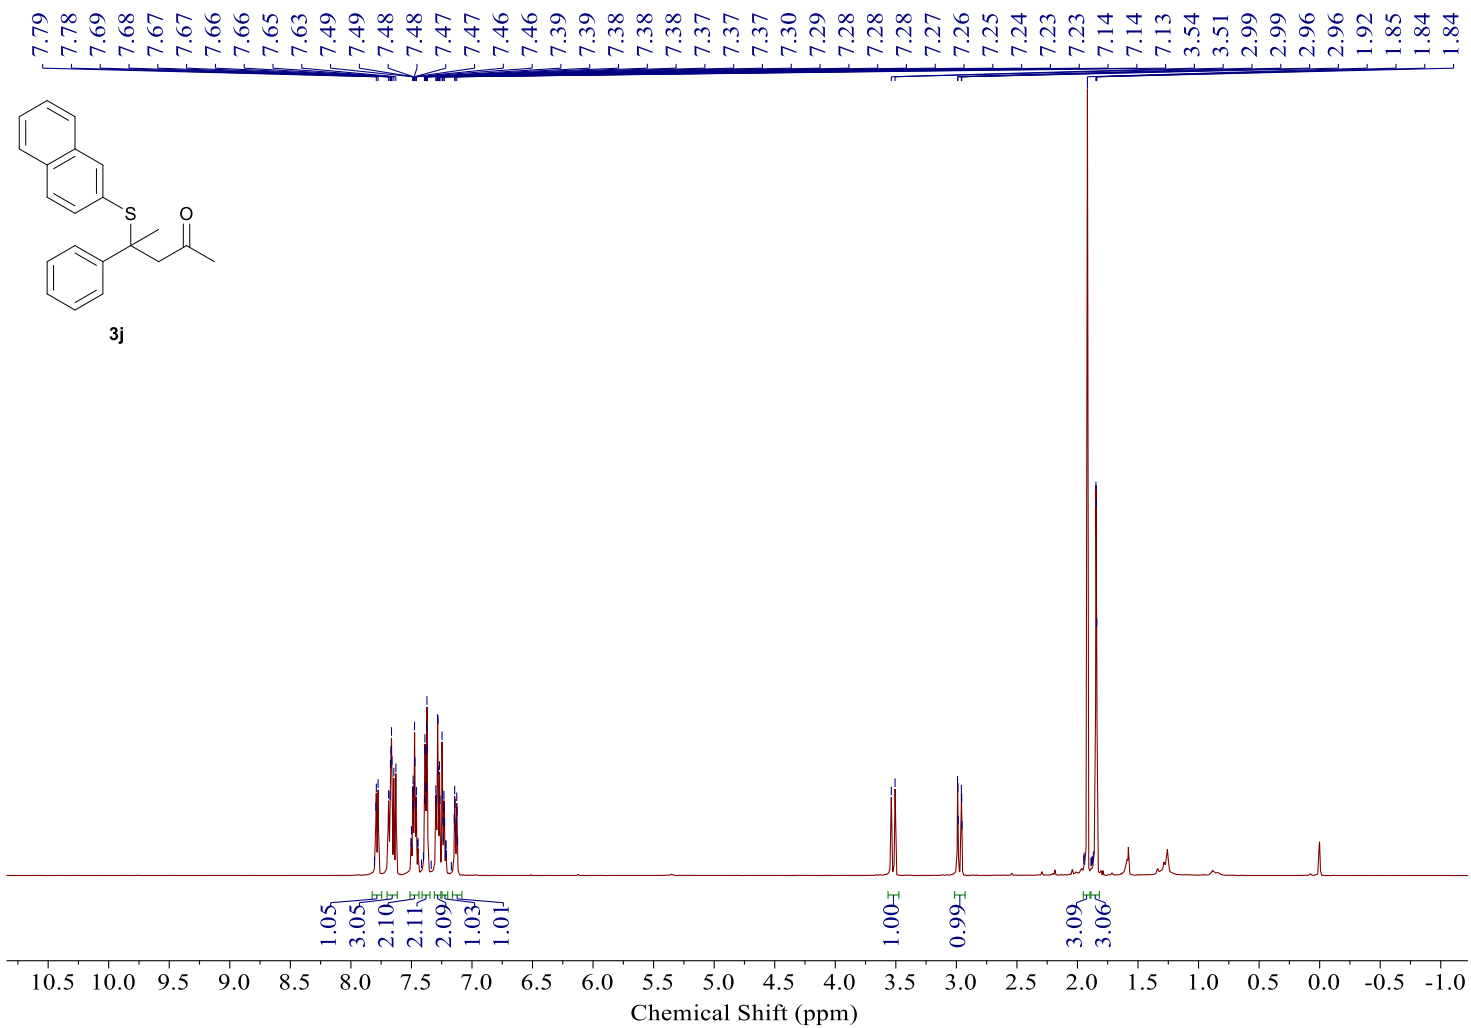

<sup>13</sup>C NMR of compound **3j**

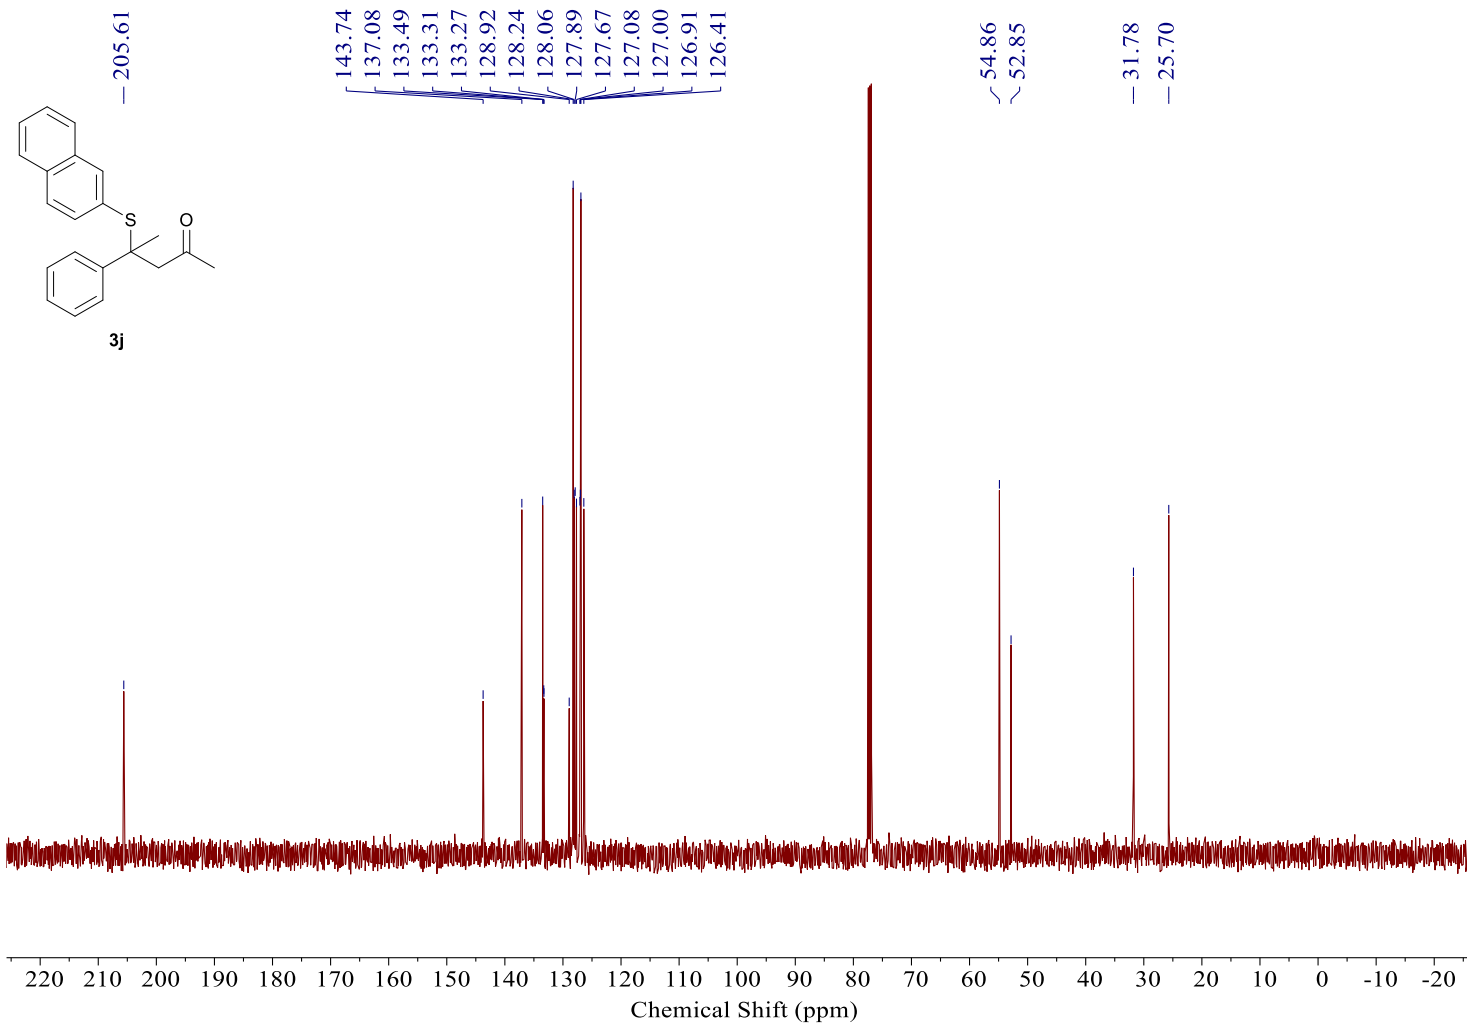

<sup>1</sup>H NMR of compound **3m**

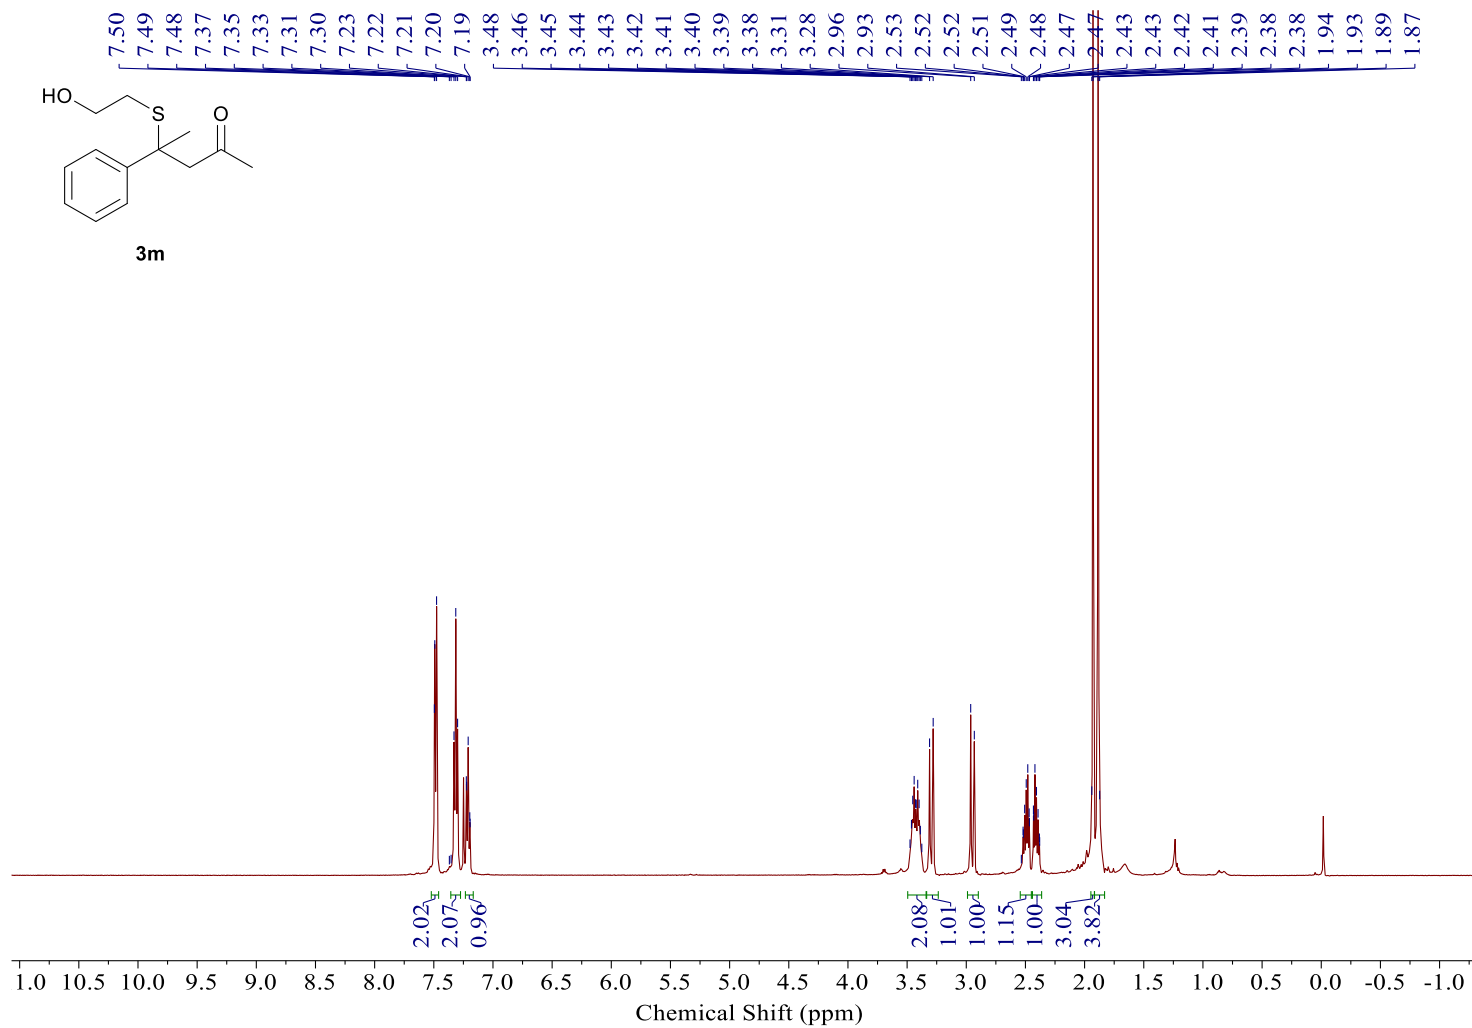

<sup>13</sup>C NMR of compound **3m**

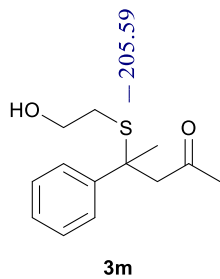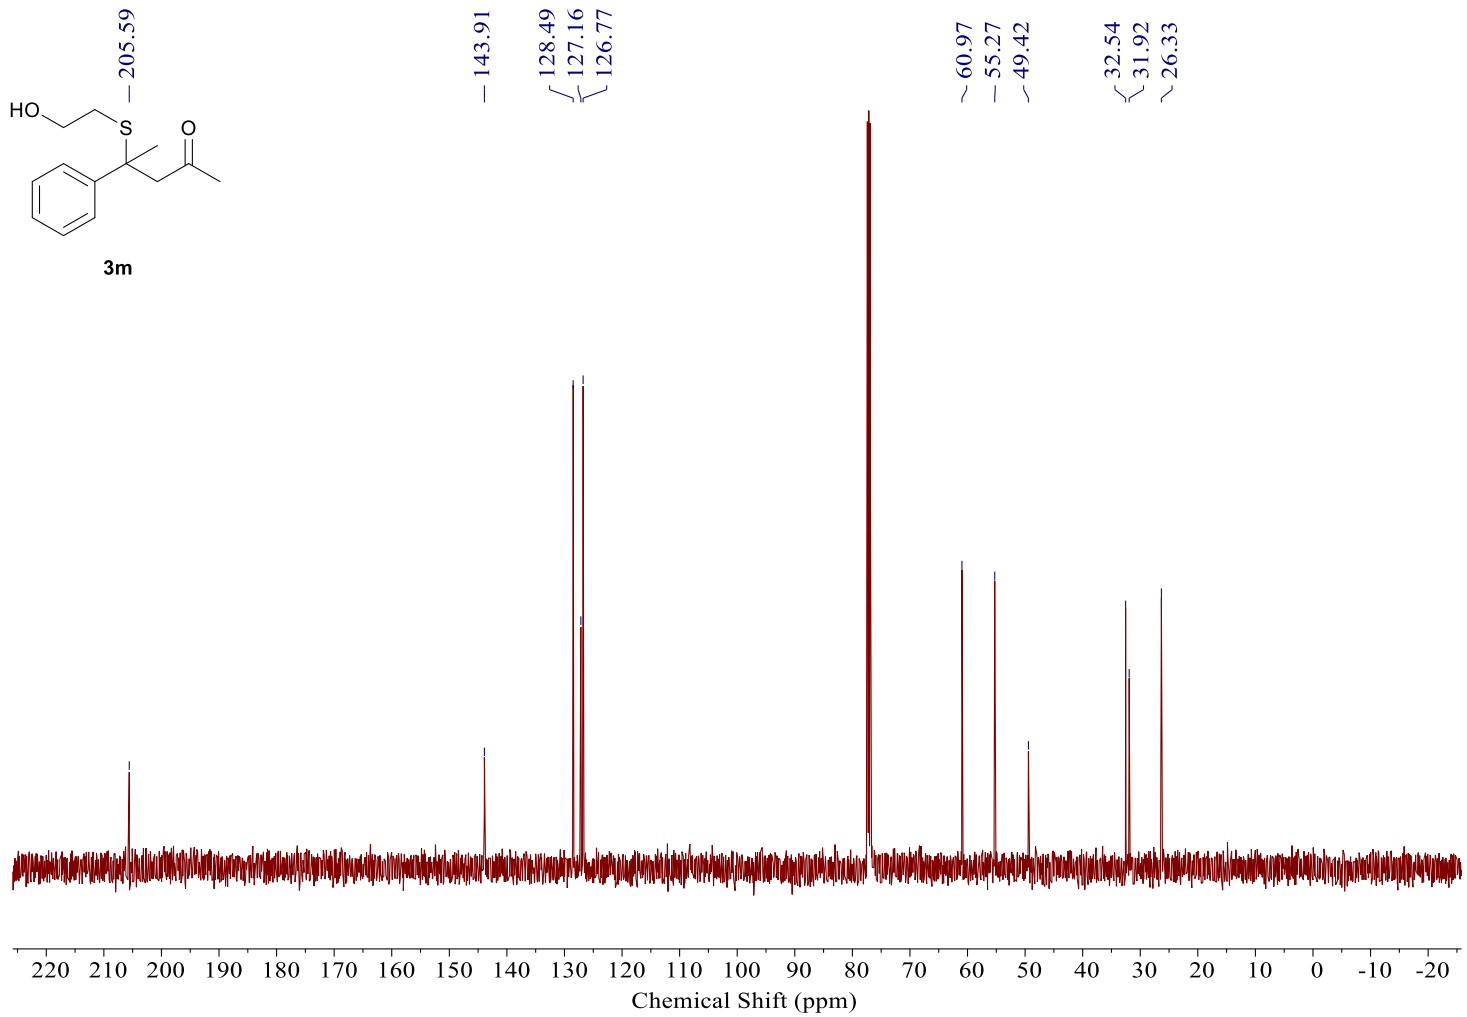



<sup>1</sup>H NMR of compound **3n**

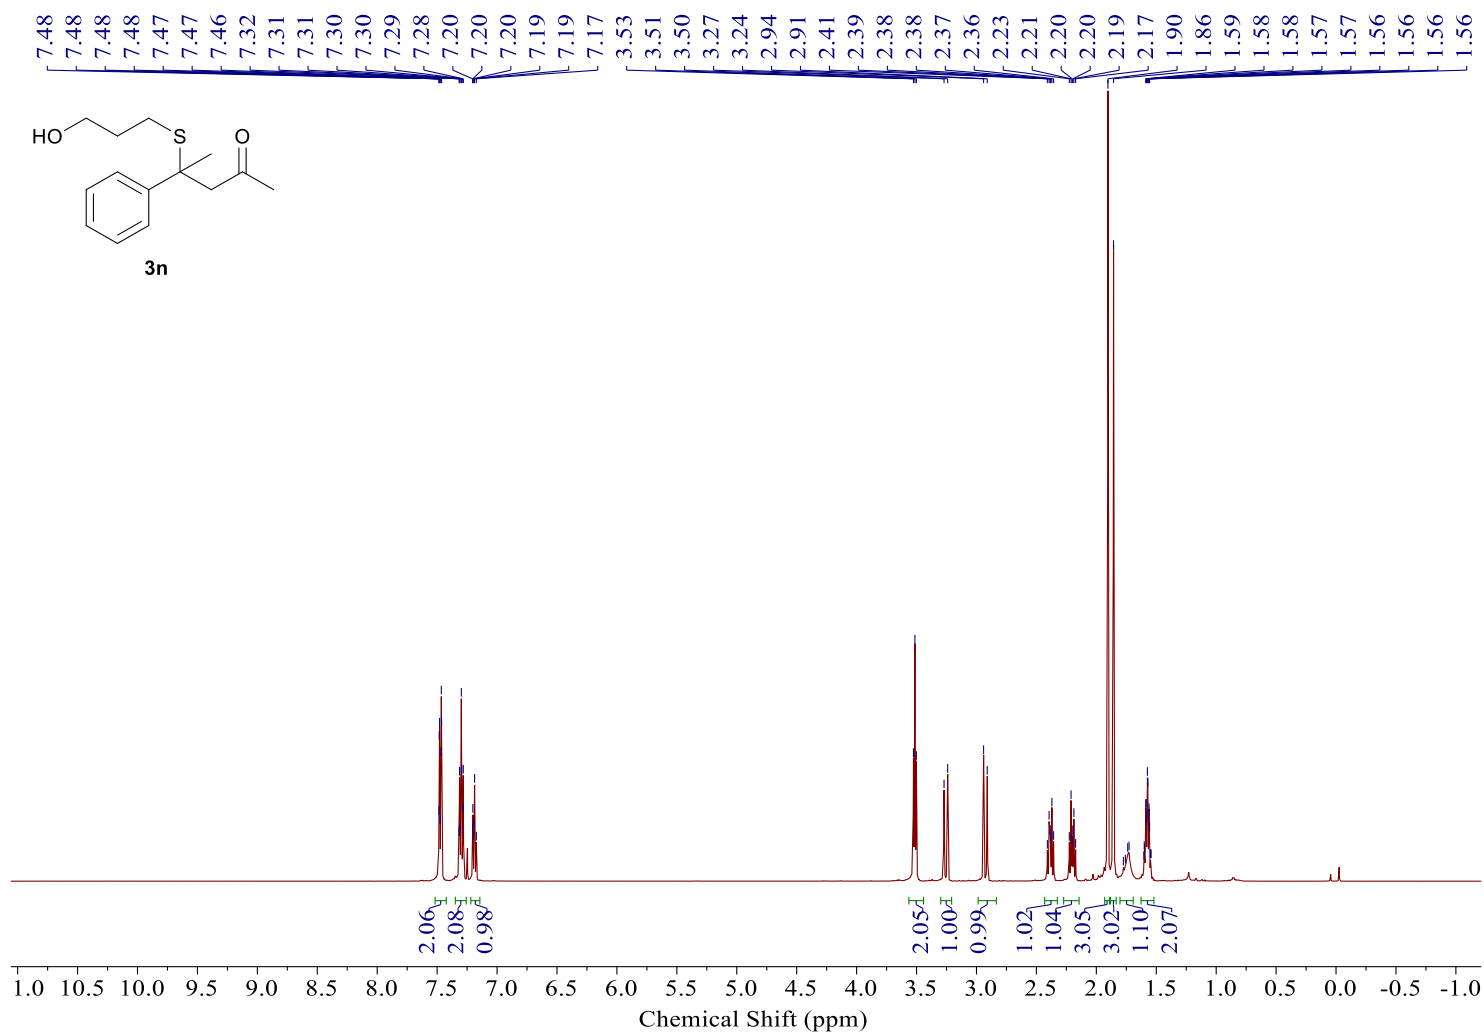

<sup>13</sup>C NMR of compound **3n**

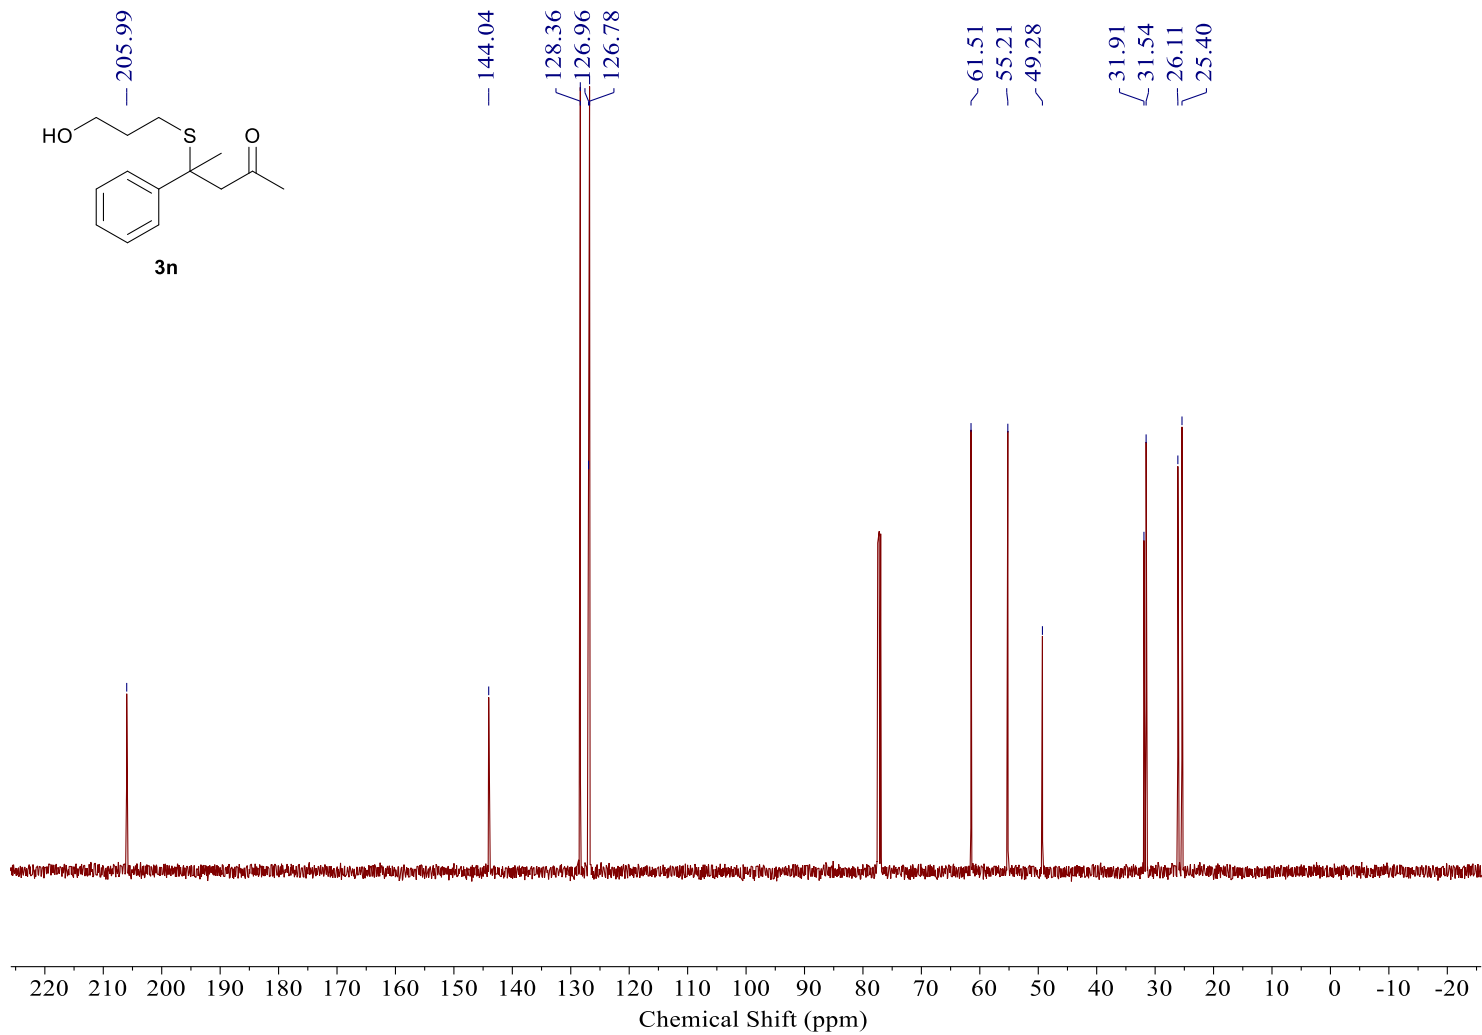

<sup>1</sup>H NMR of compound **30**

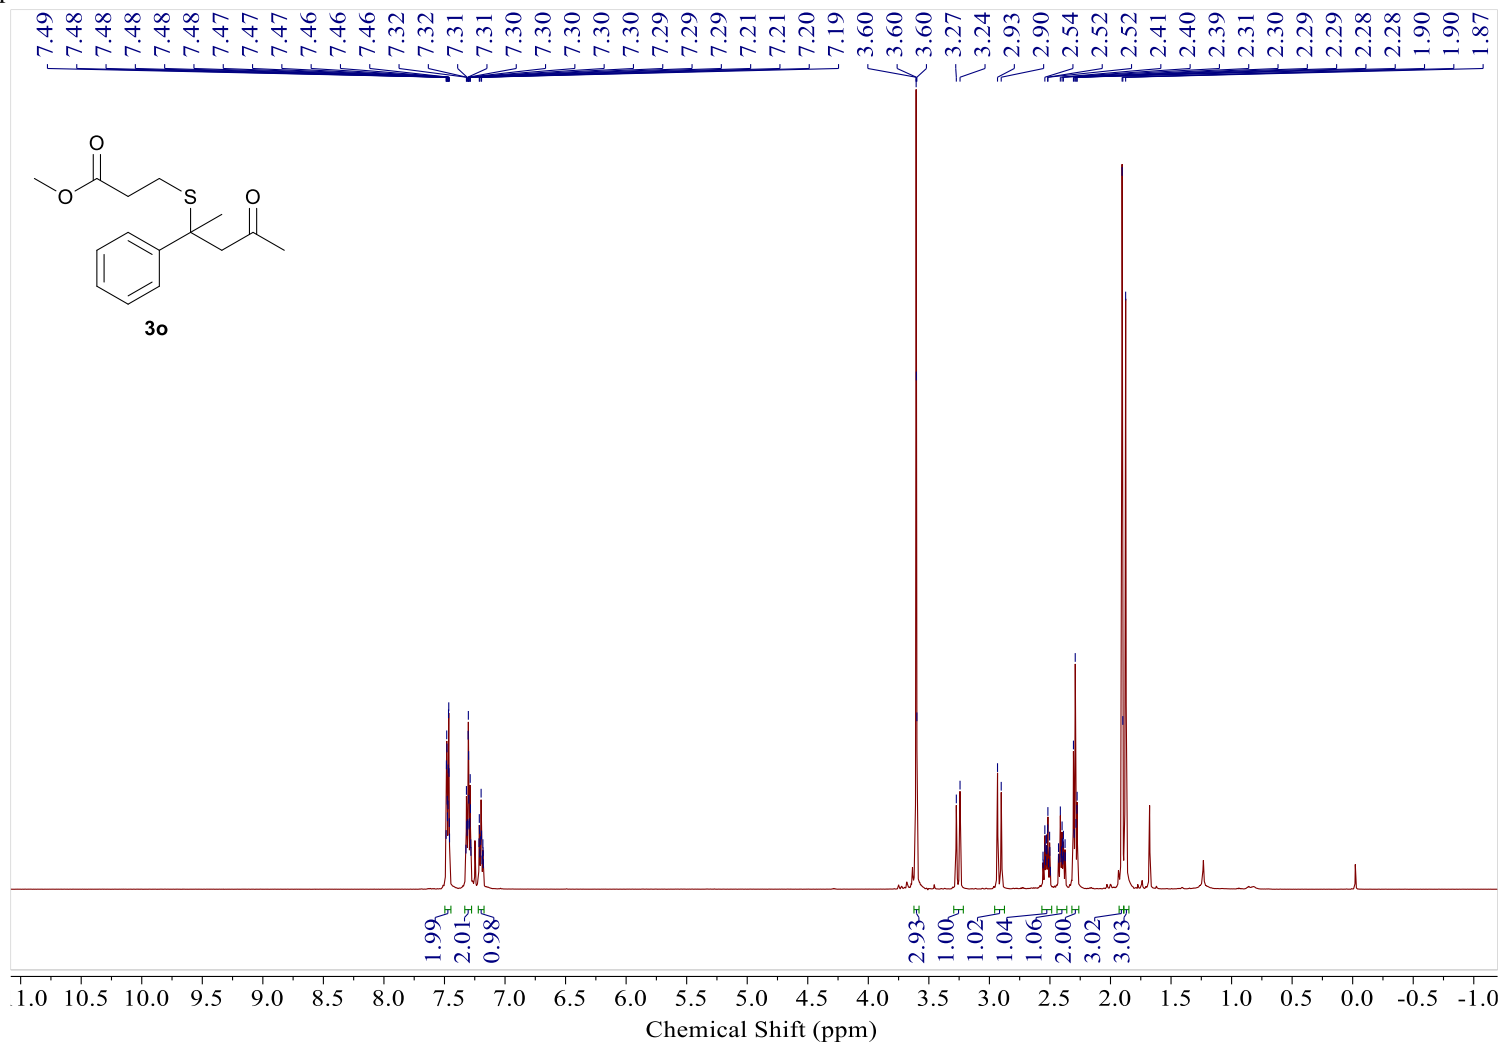

<sup>13</sup>C NMR of compound **3o**

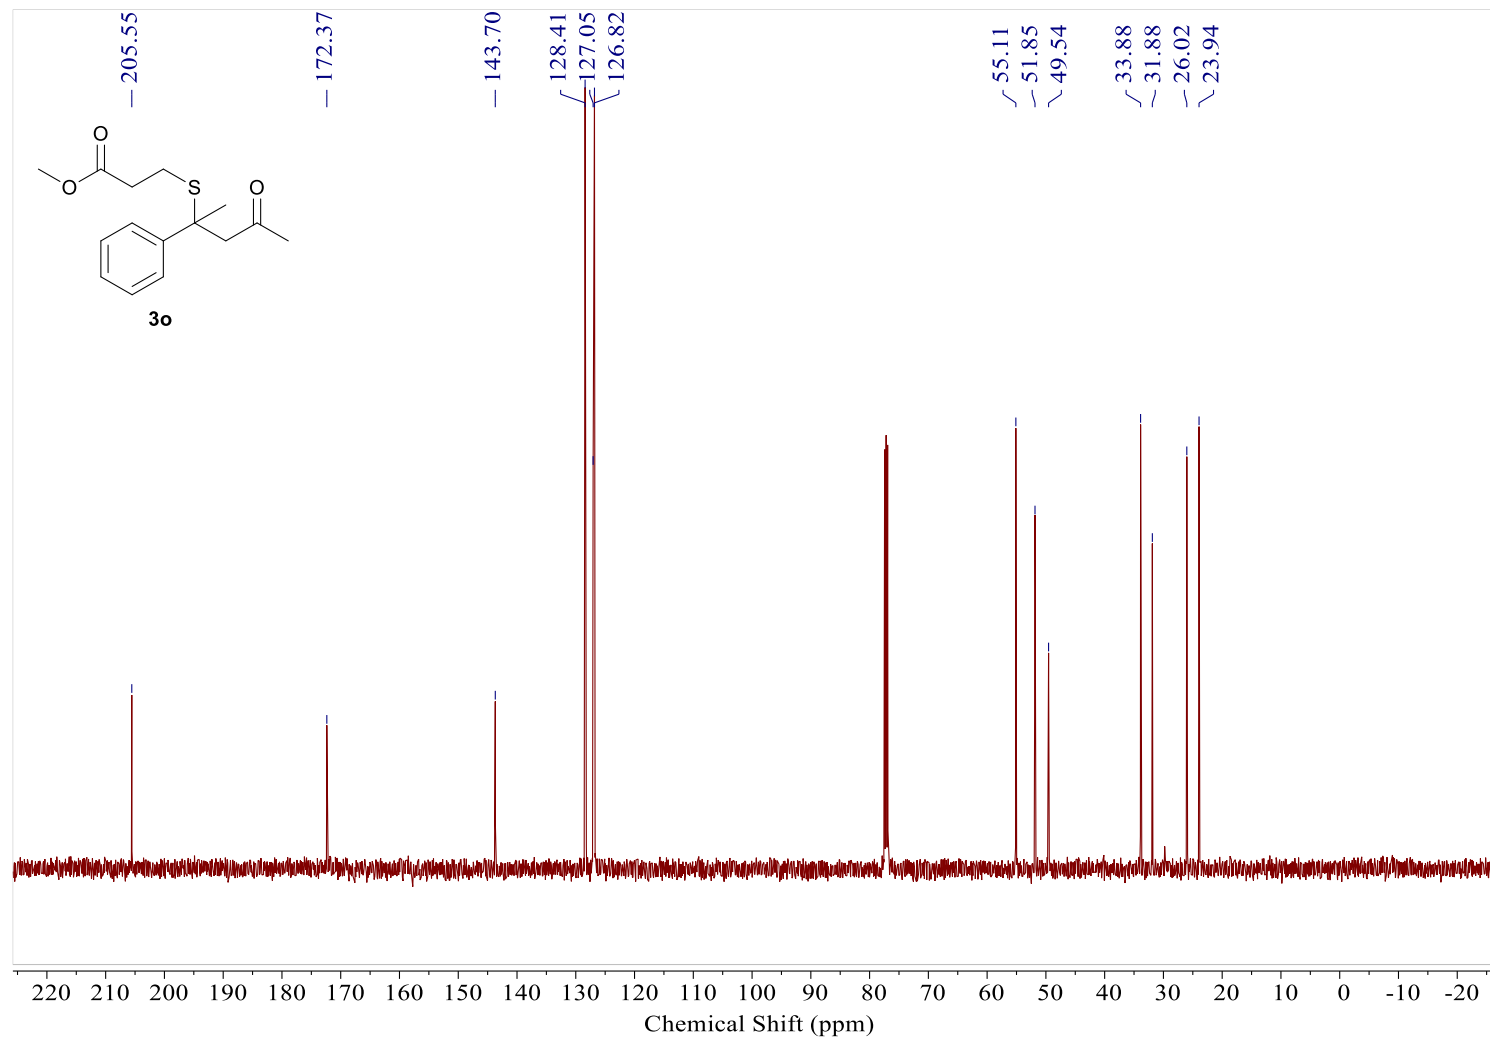

<sup>1</sup>H NMR of compound **3q**

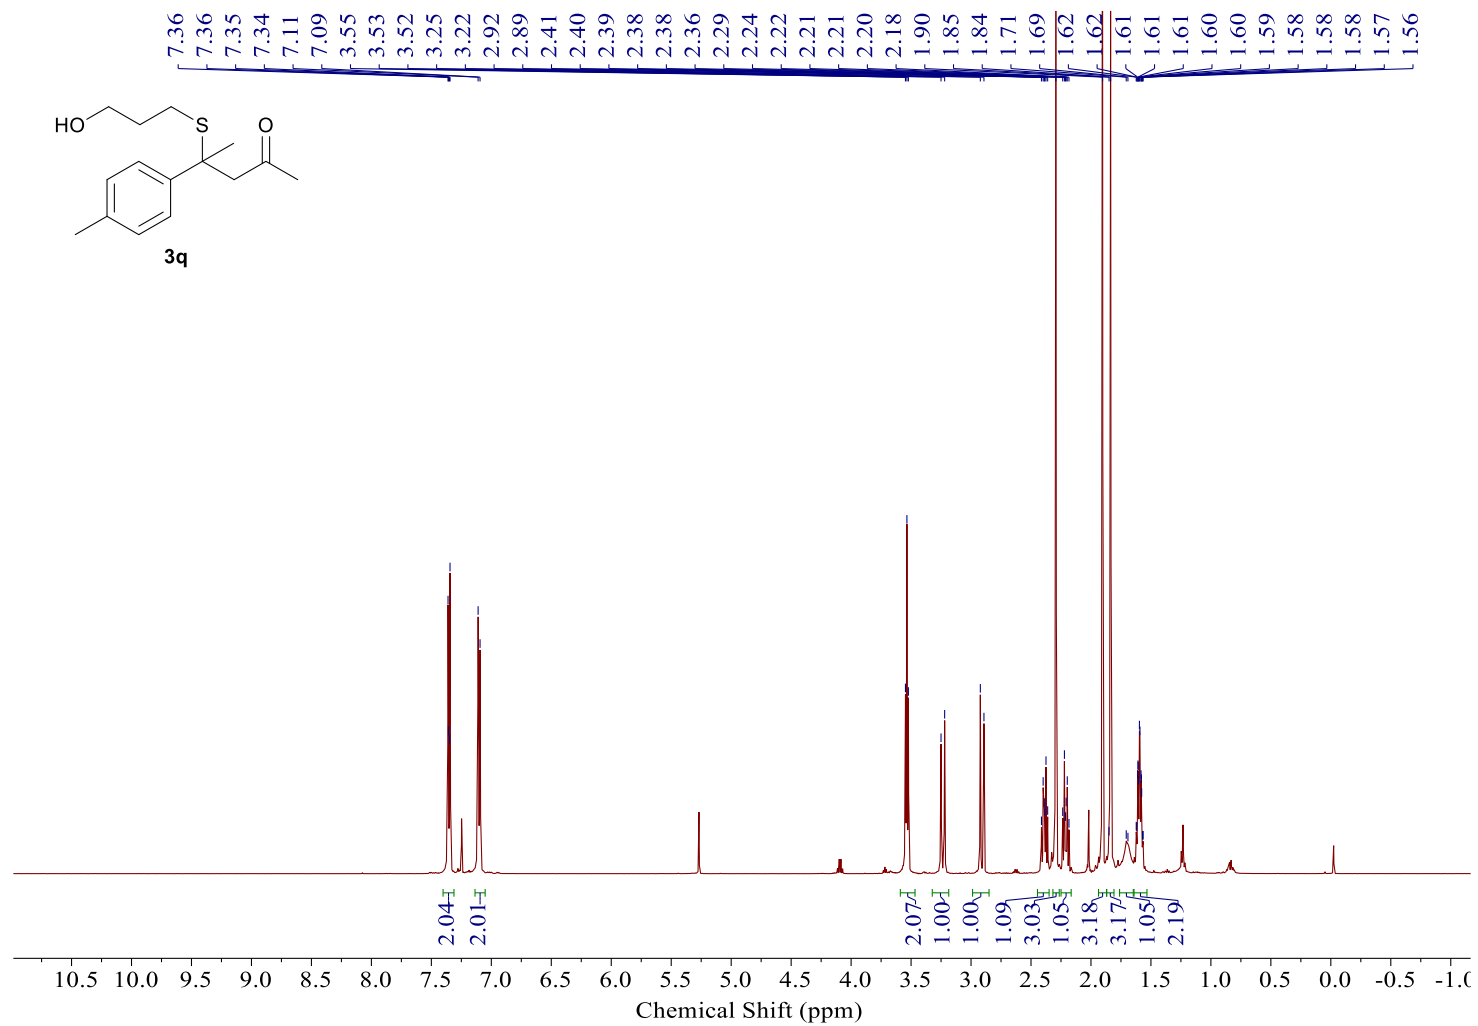

<sup>13</sup>C NMR of compound **3q**

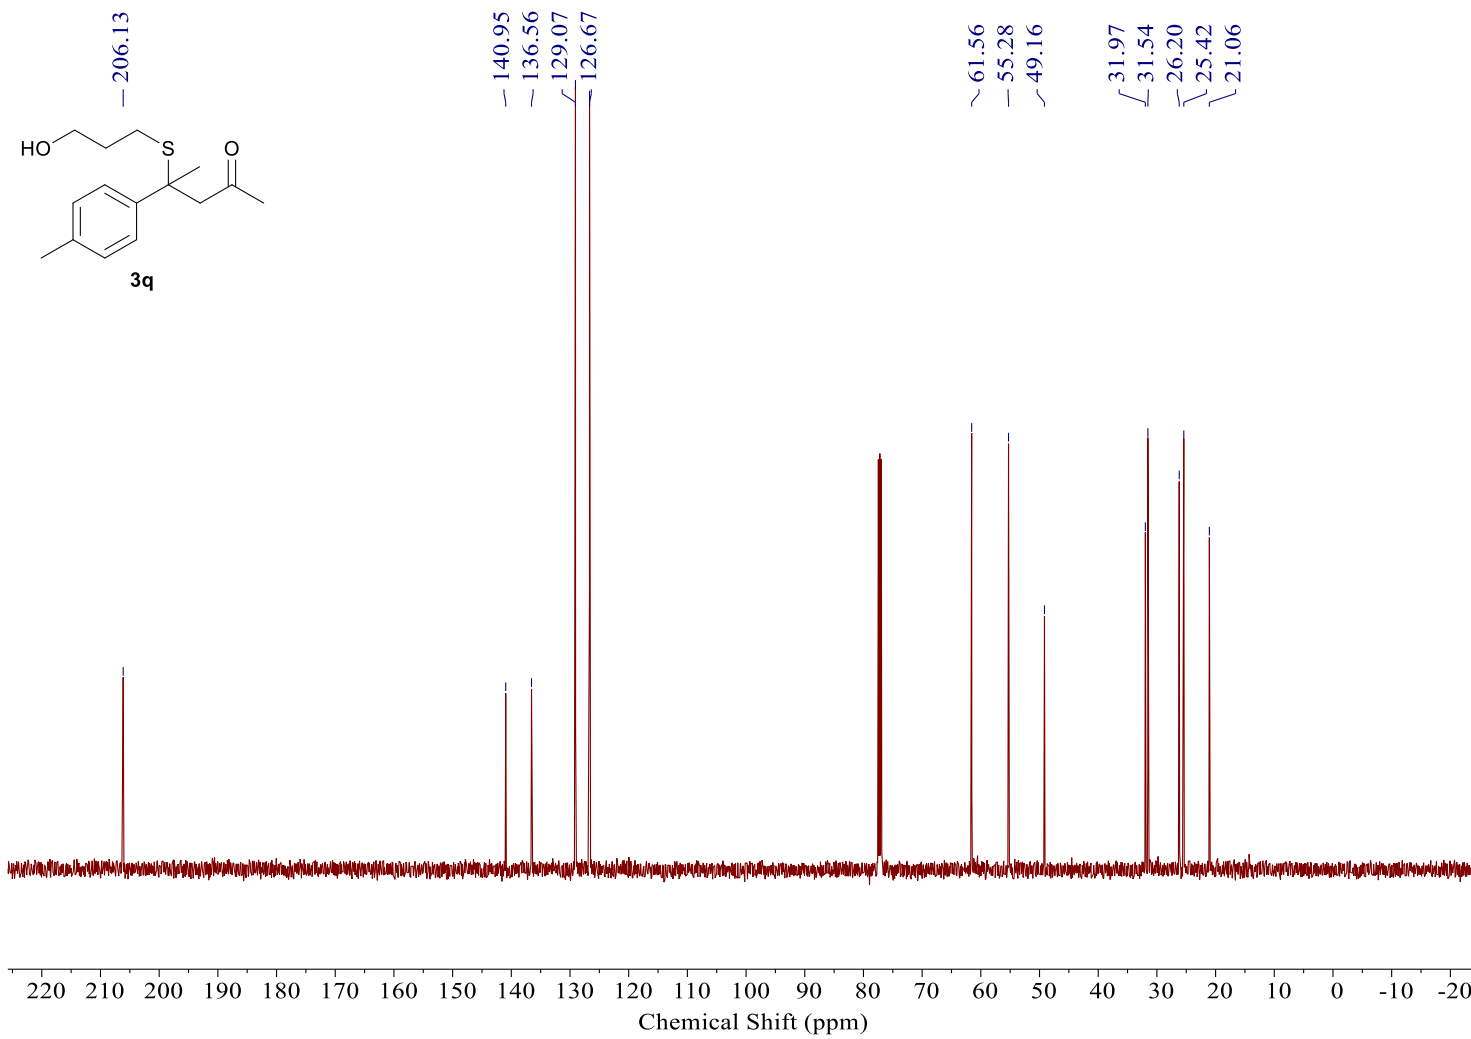

<sup>1</sup>H NMR of compound **3r**

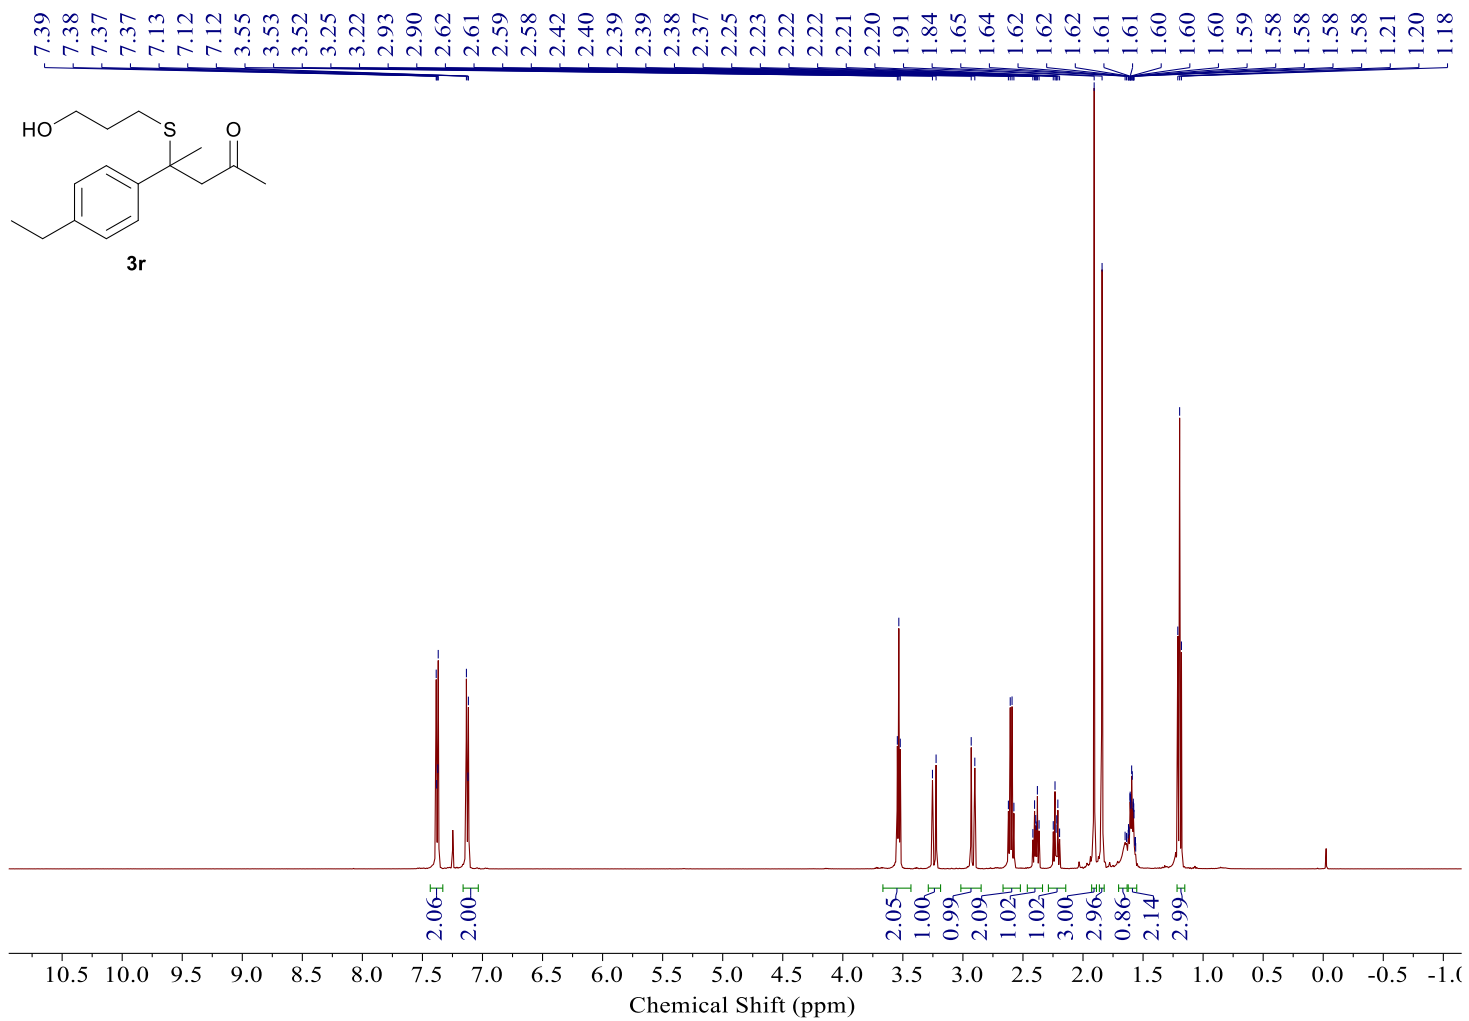

<sup>13</sup>C NMR of compound **3r**

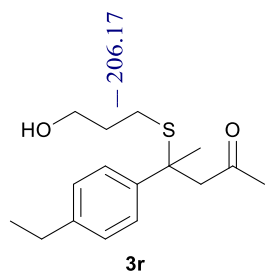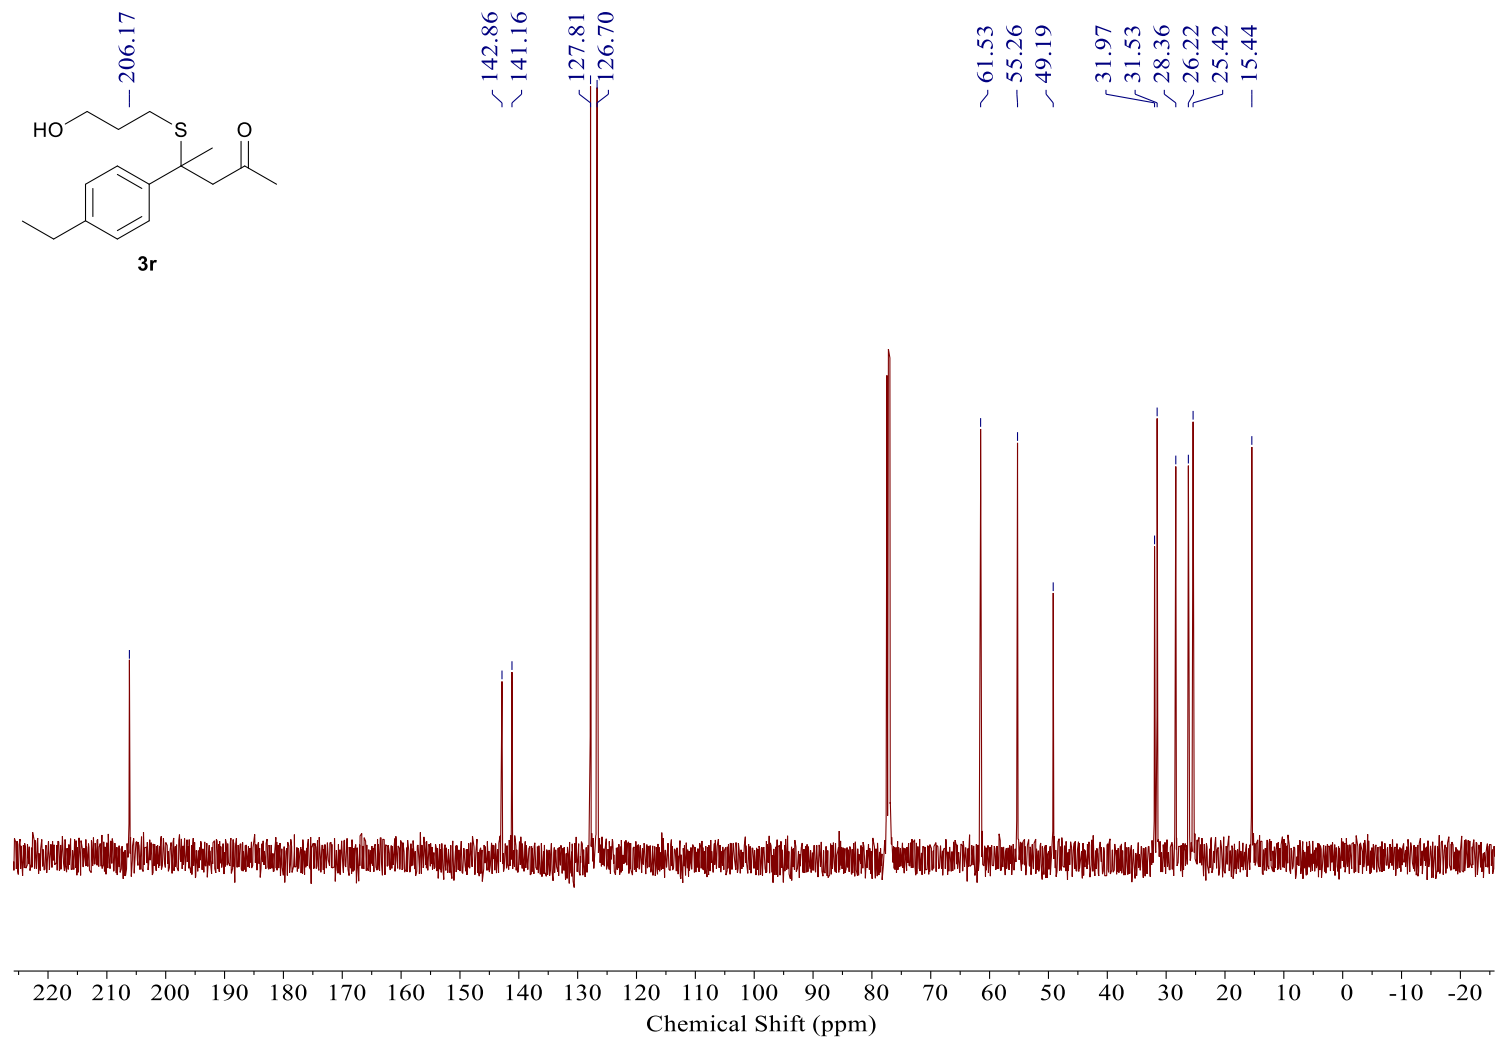



<sup>1</sup>H NMR of compound **3s**

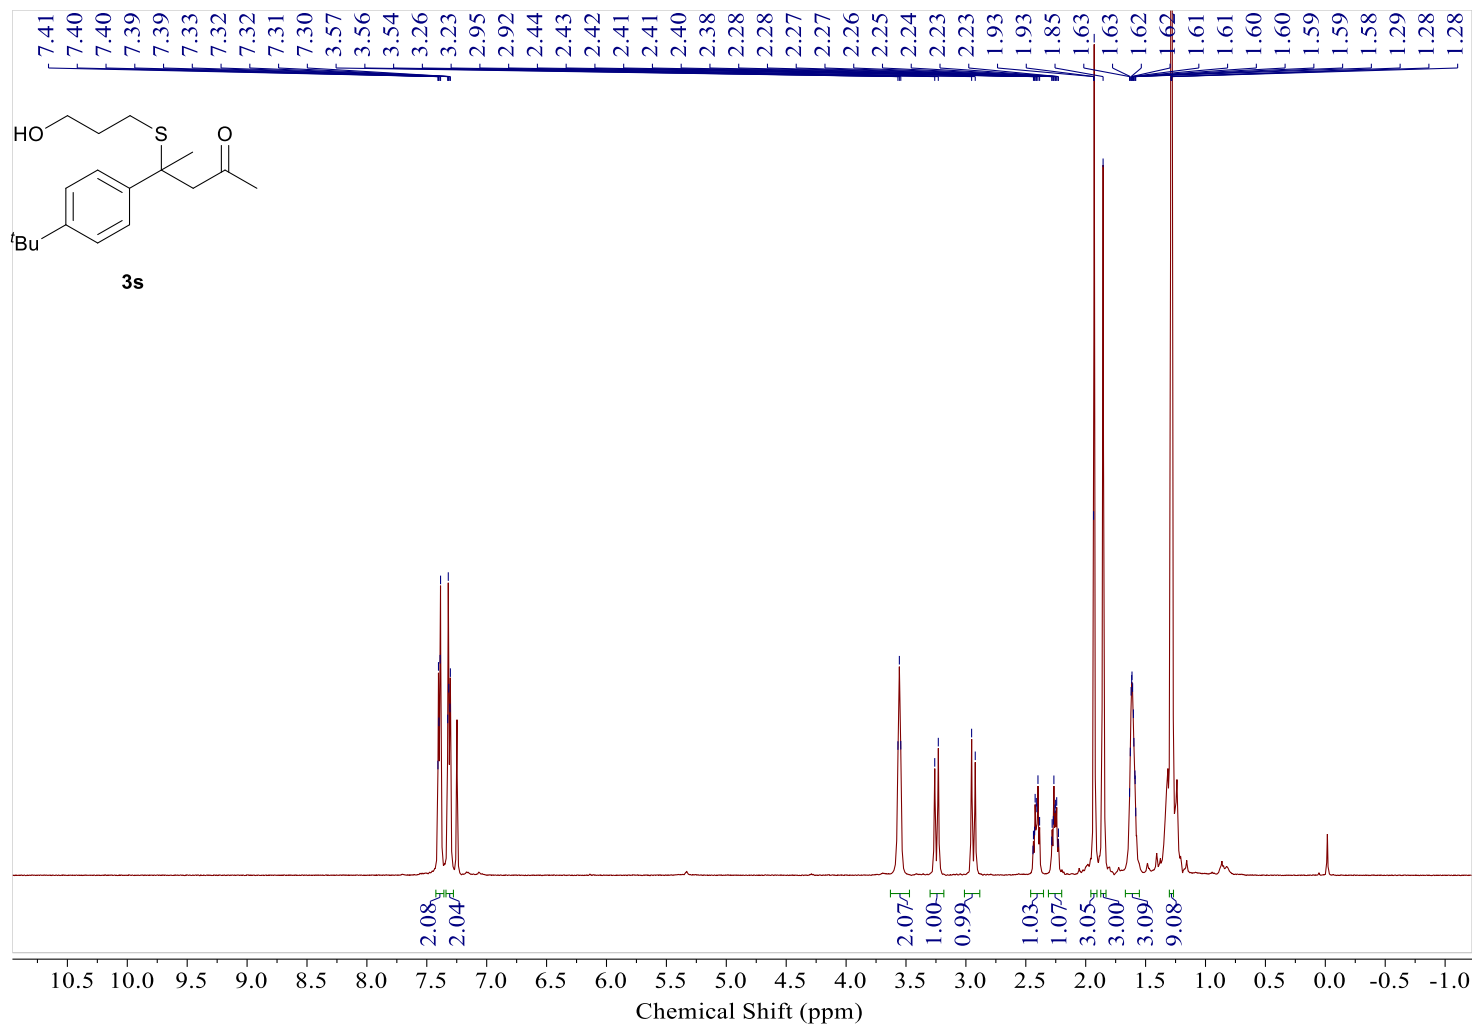

<sup>13</sup>C NMR of compound **3s**

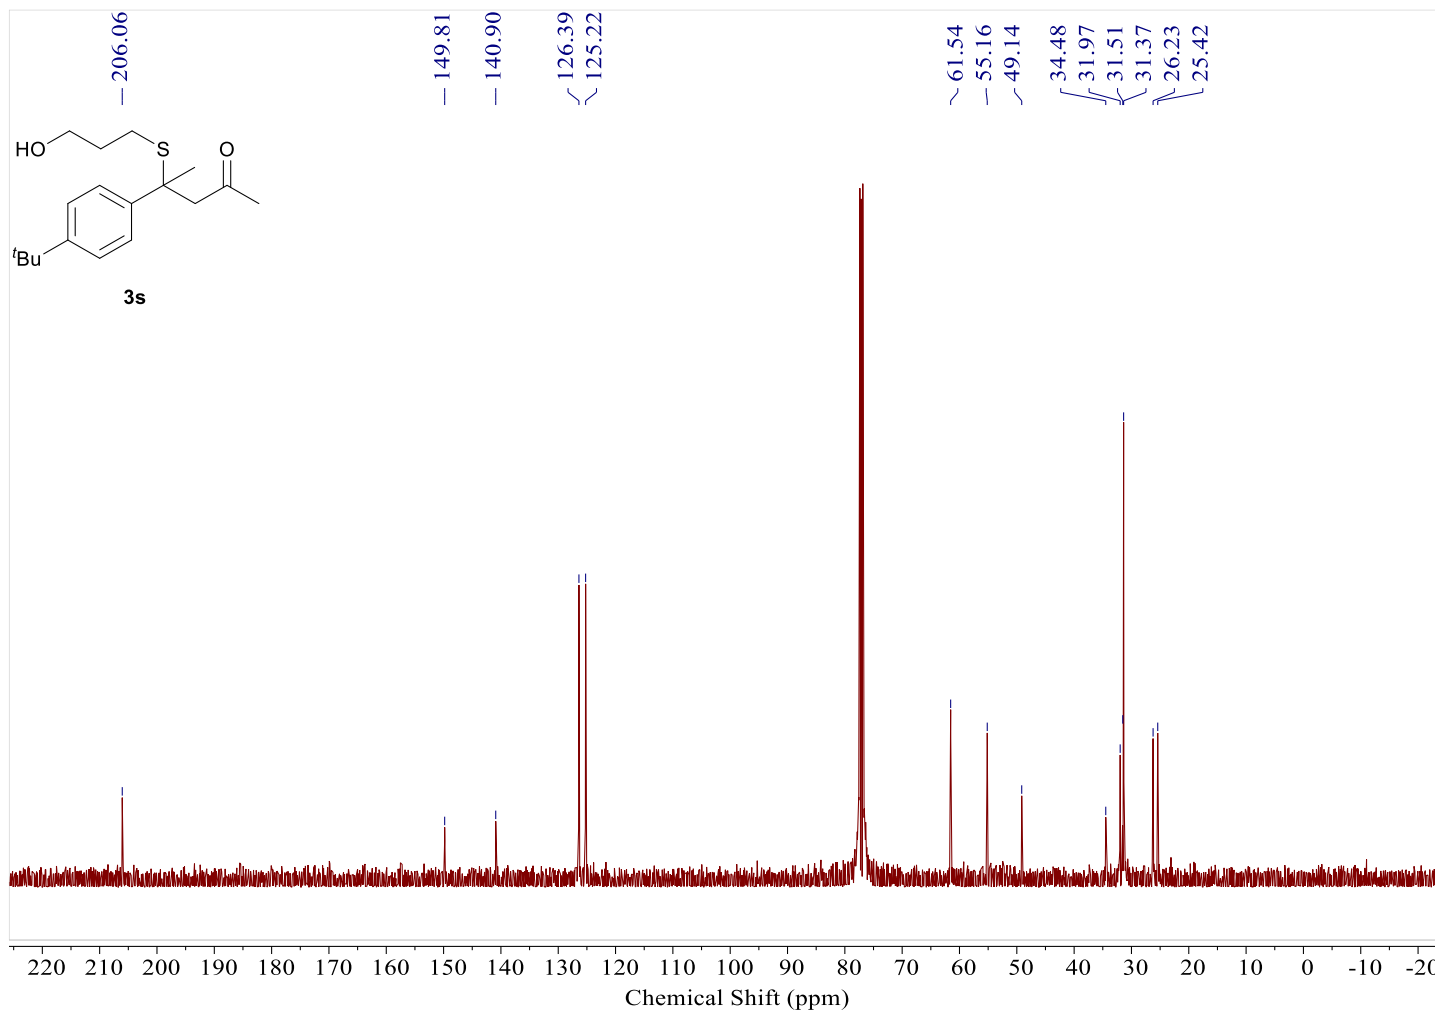

<sup>1</sup>H NMR of compound **3t**

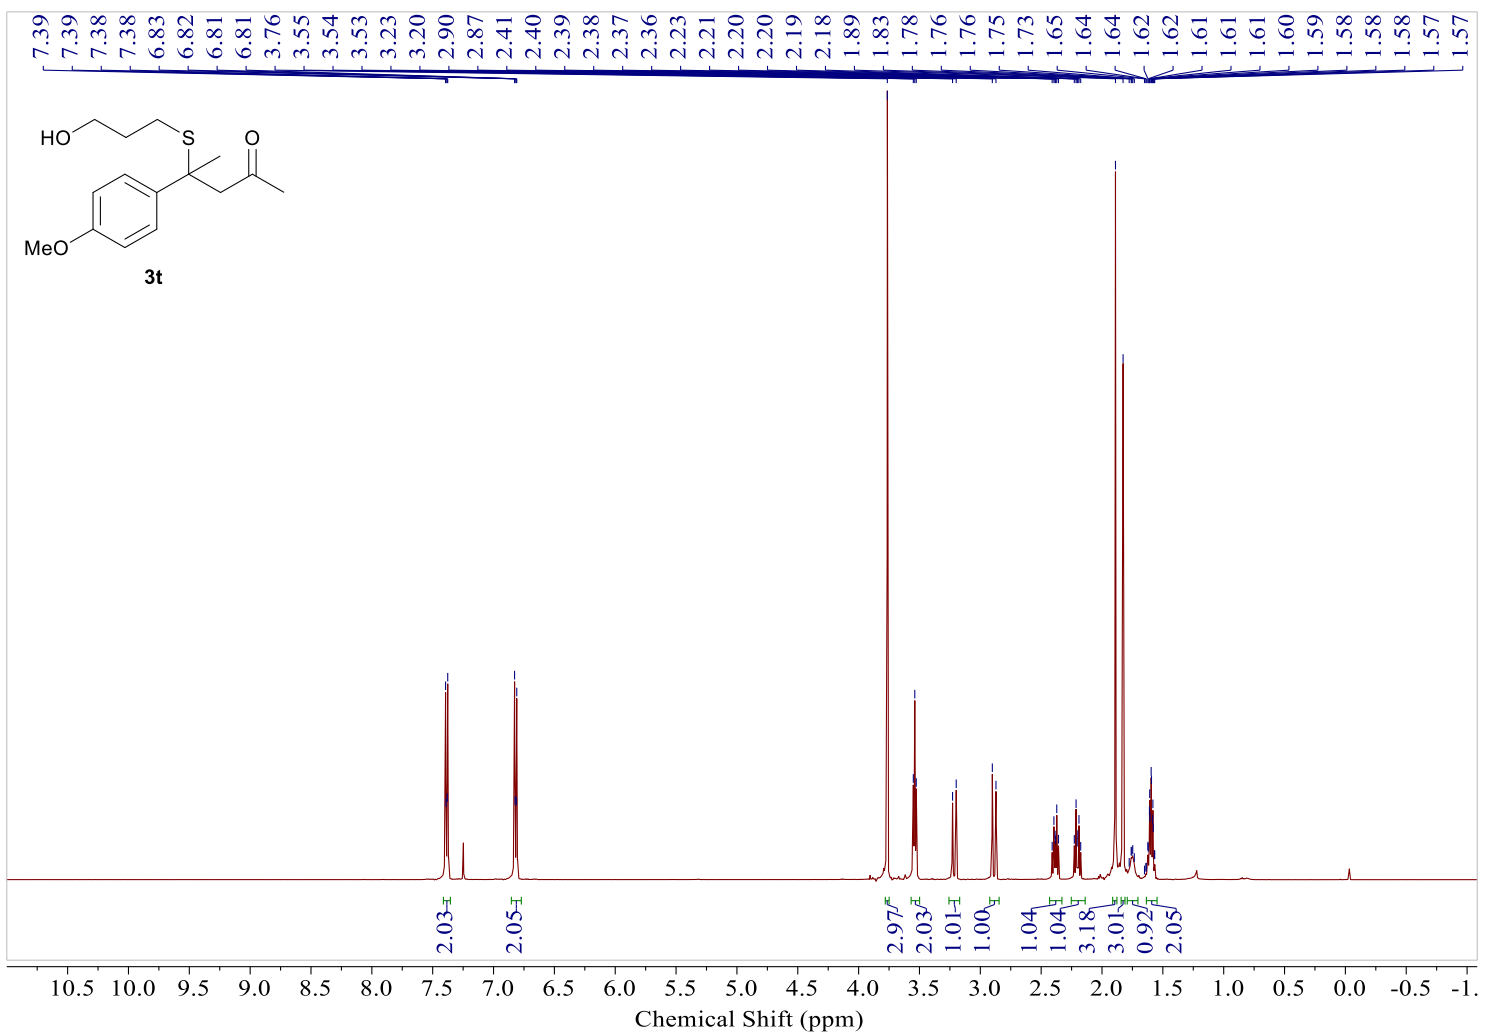

<sup>13</sup>C NMR of compound **3t**

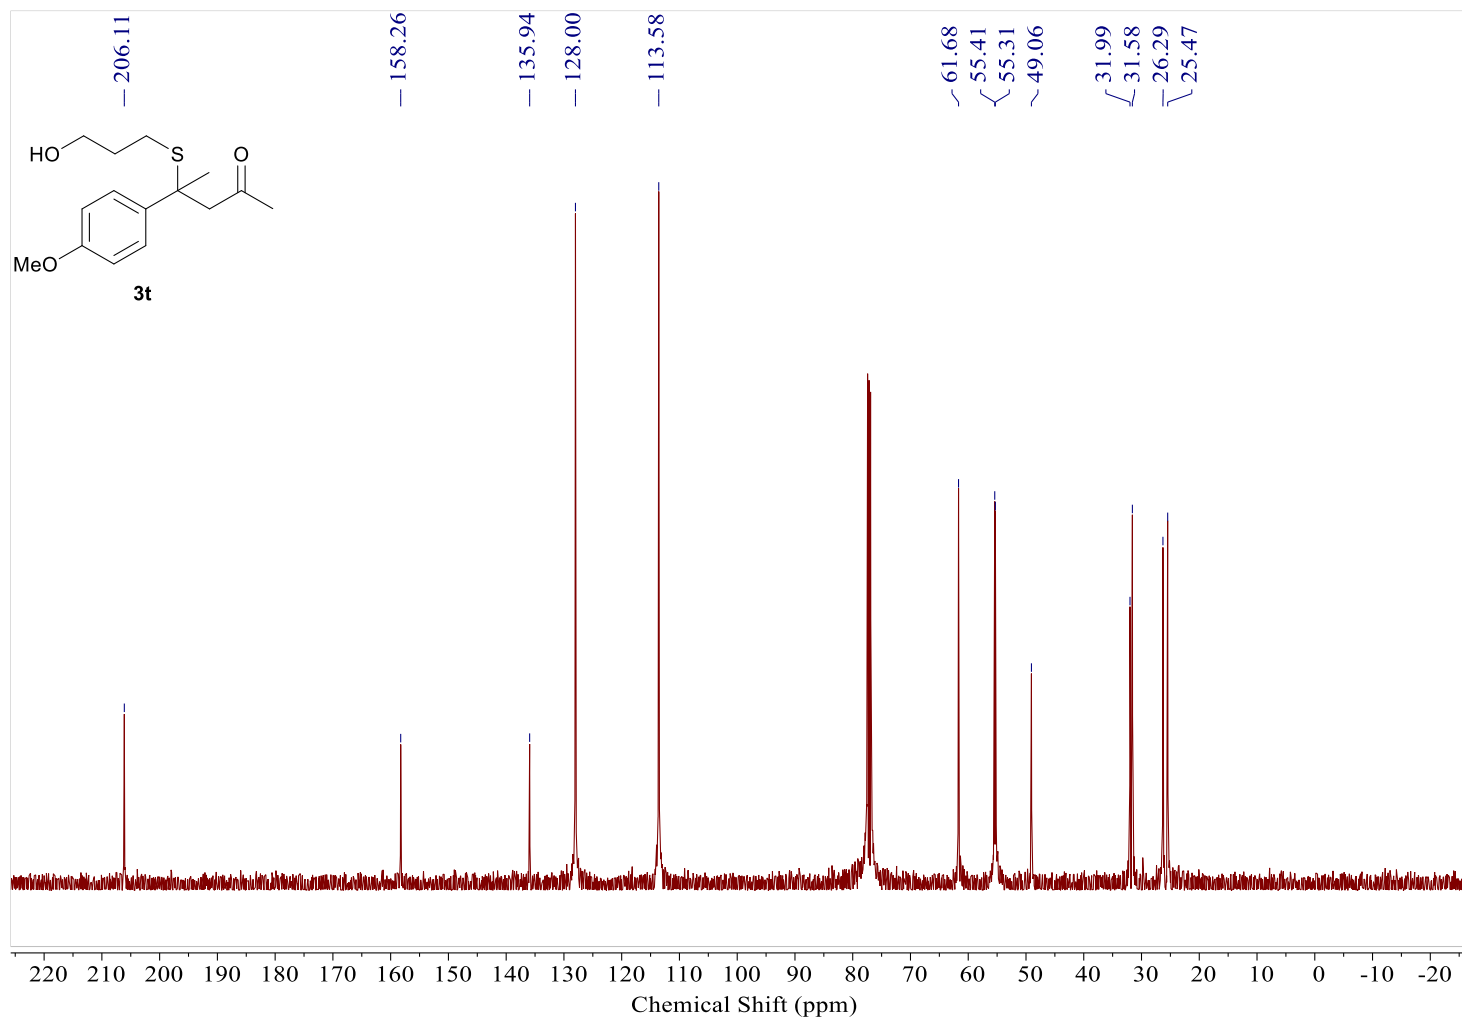

<sup>1</sup>H NMR of compound **3u**

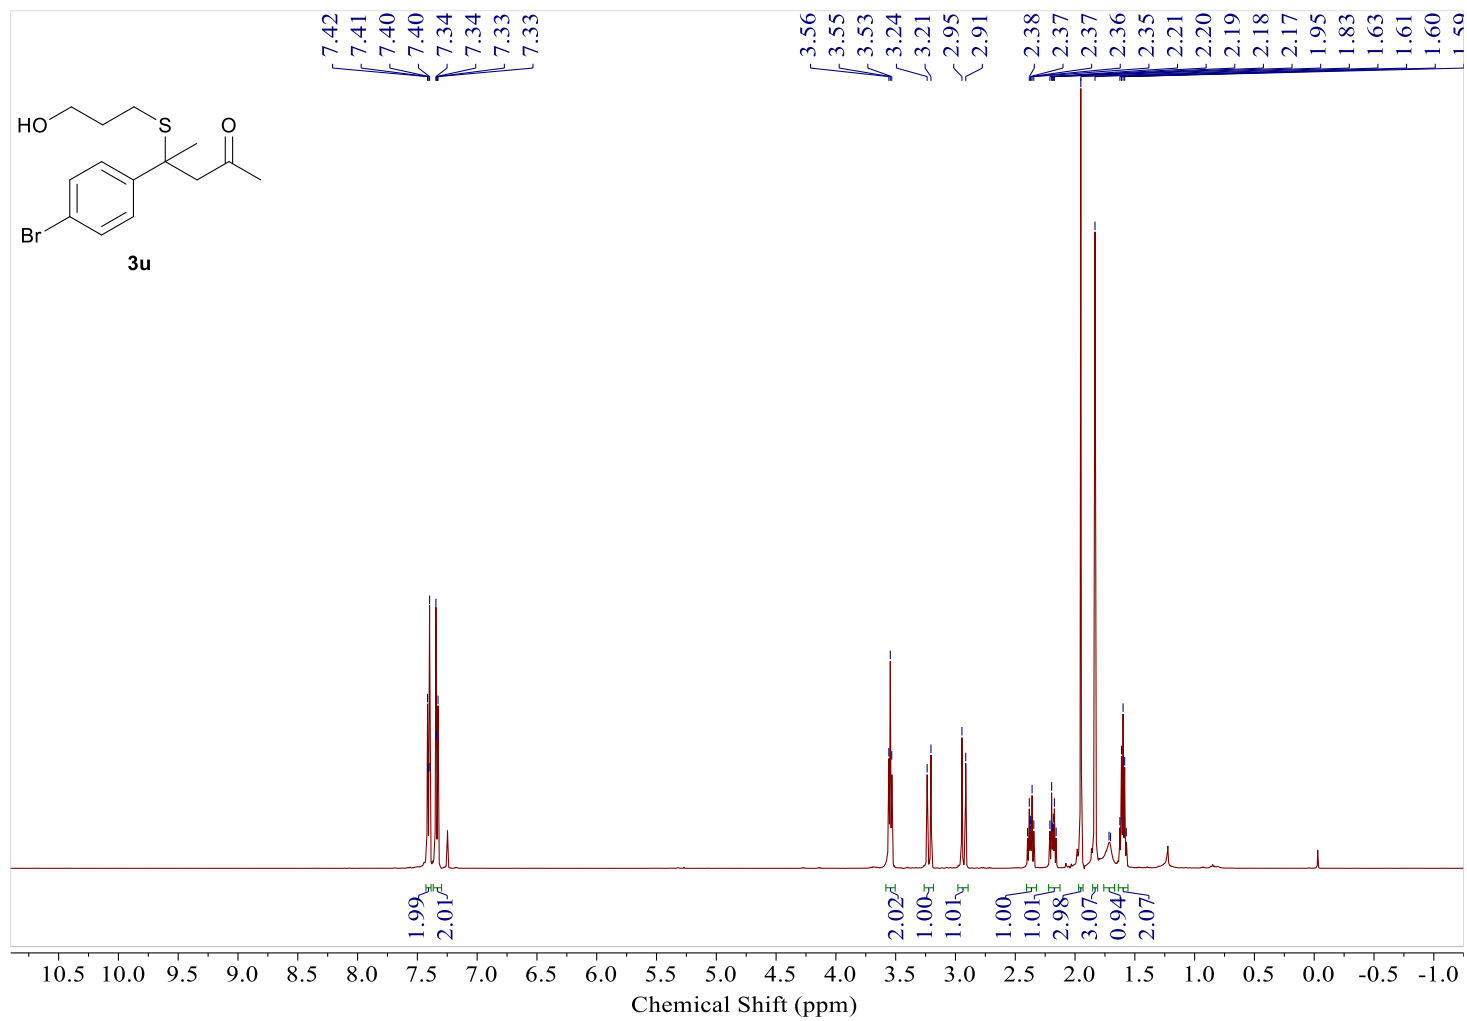

<sup>13</sup>C NMR of compound **3u**

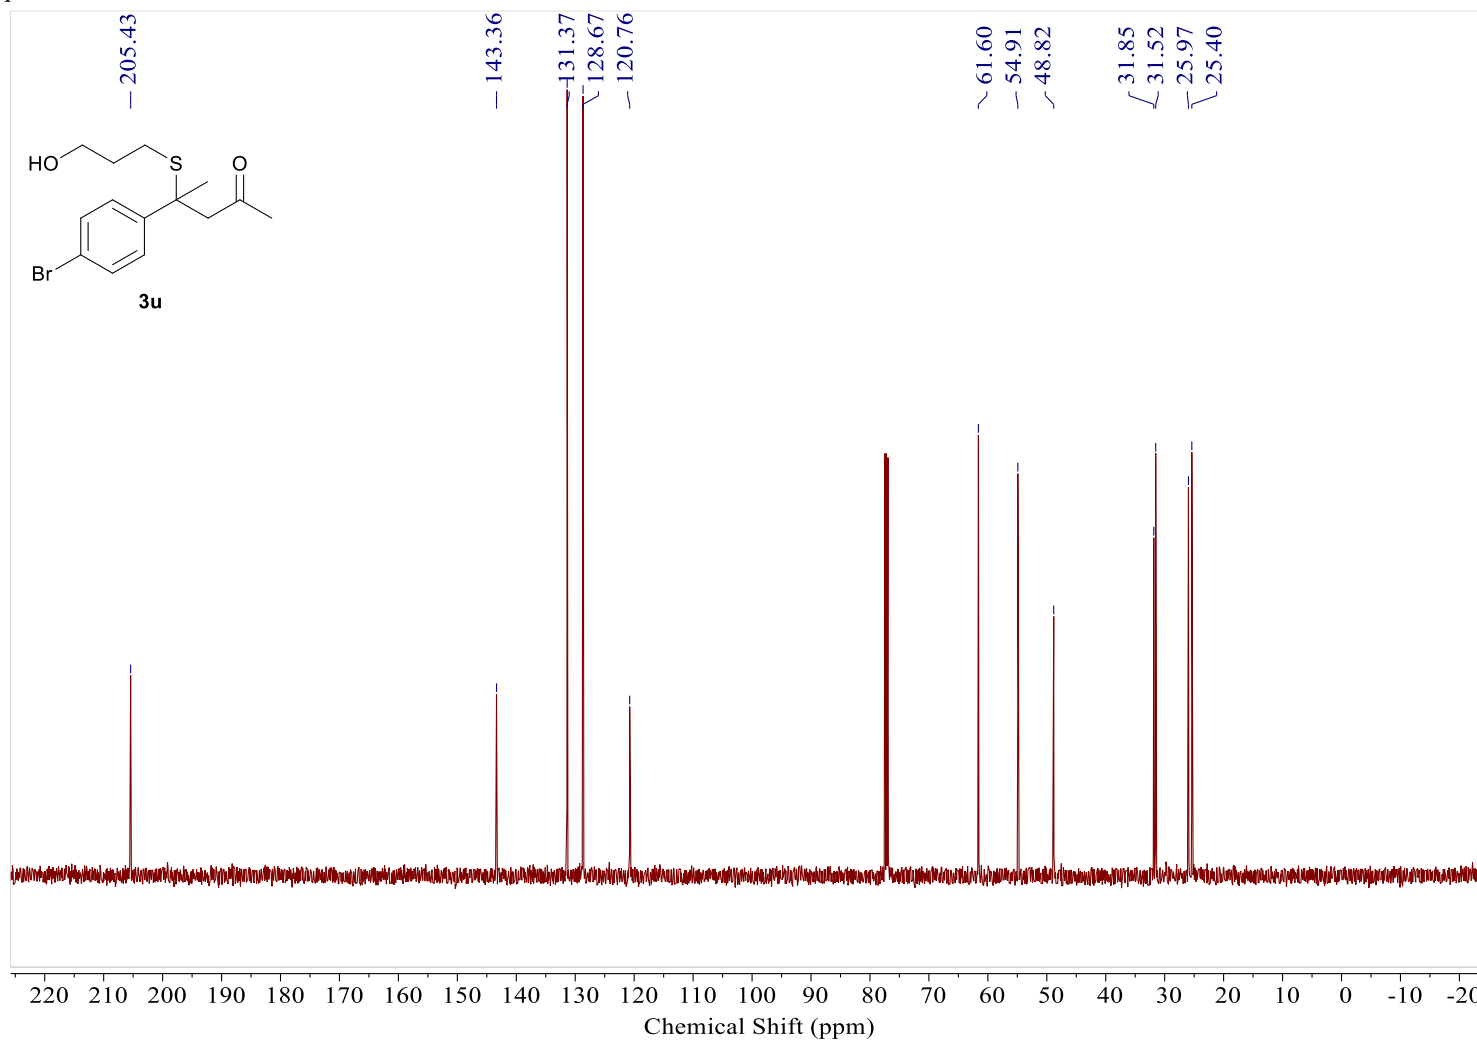

<sup>1</sup>H NMR of compound **3v**

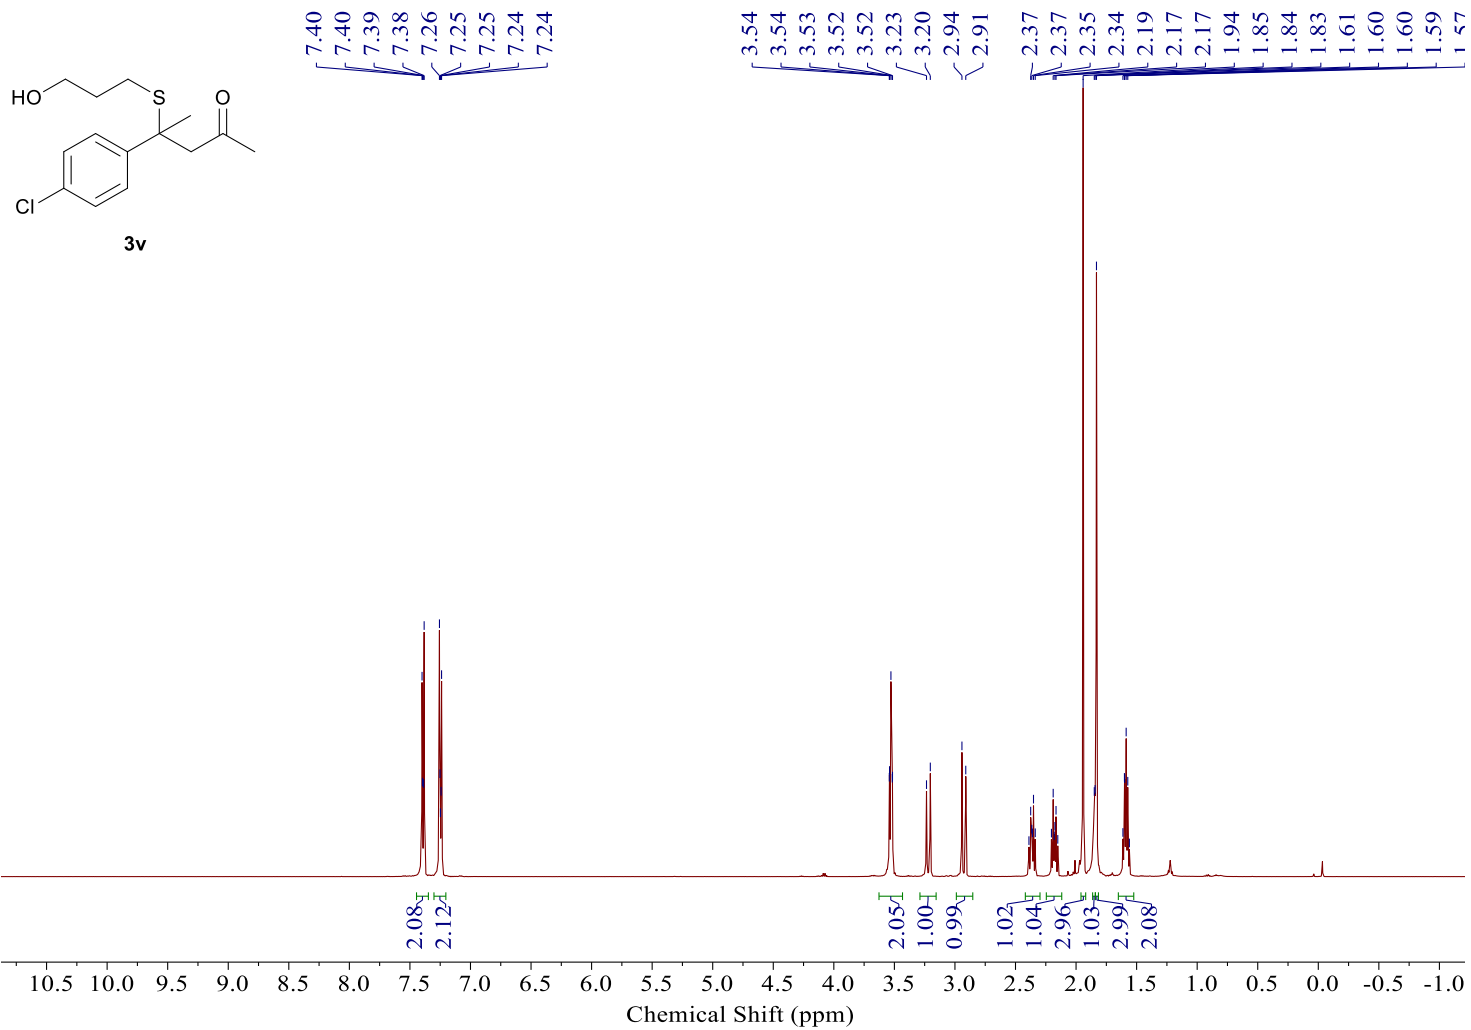

<sup>13</sup>C NMR of compound **3v**

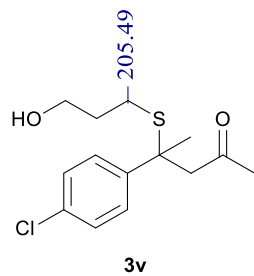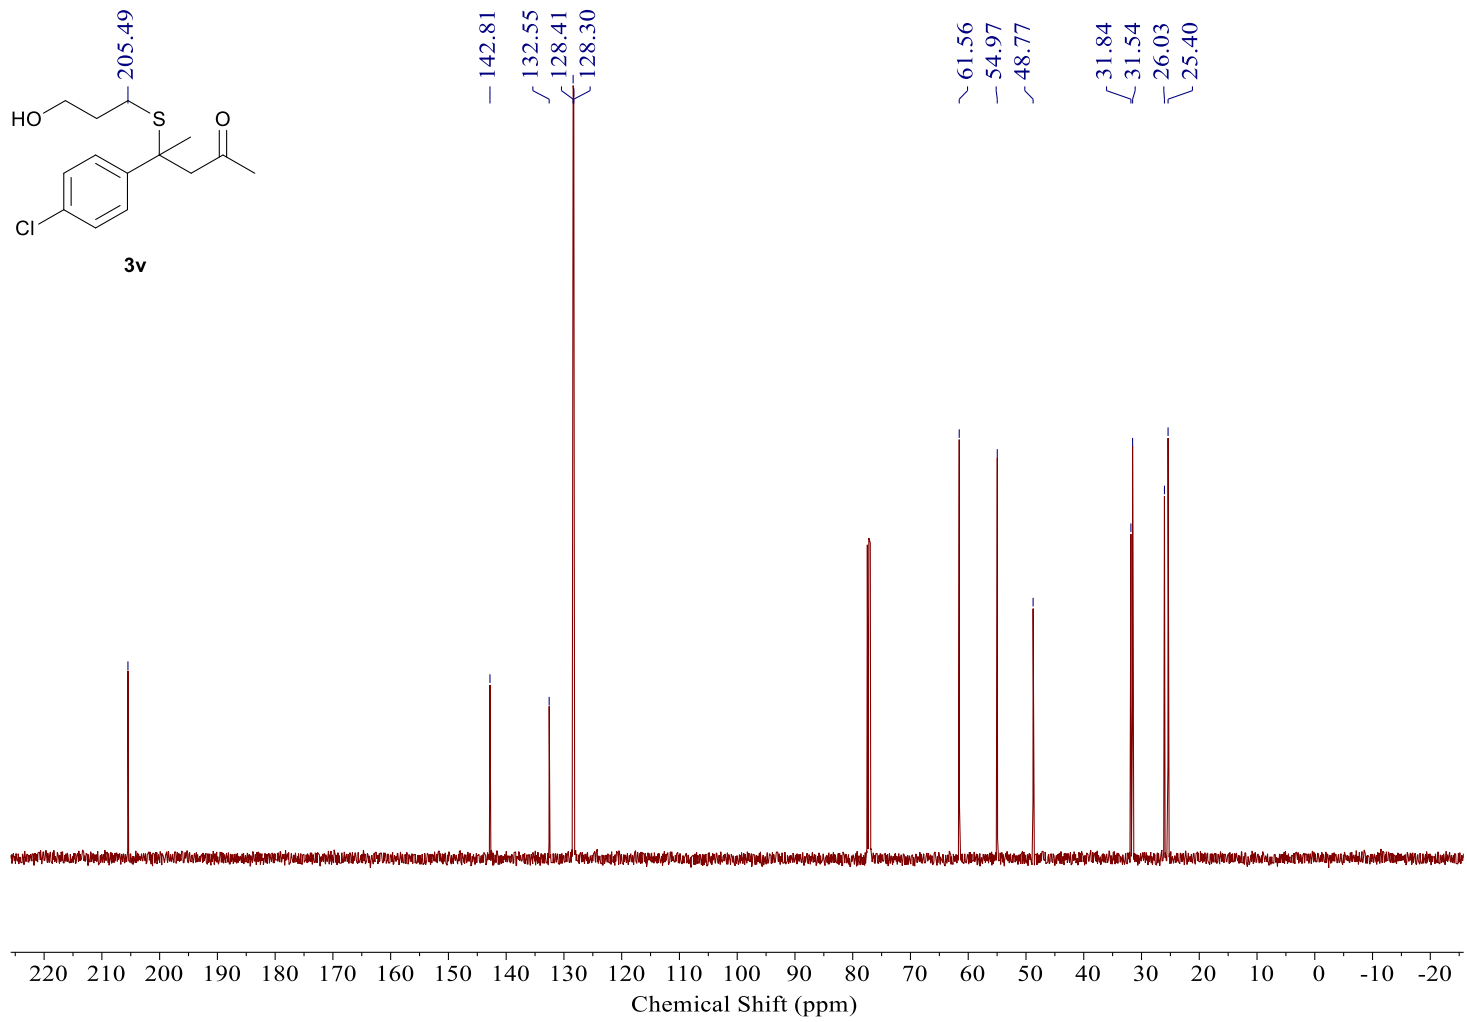



<sup>1</sup>H NMR of compound **3w**

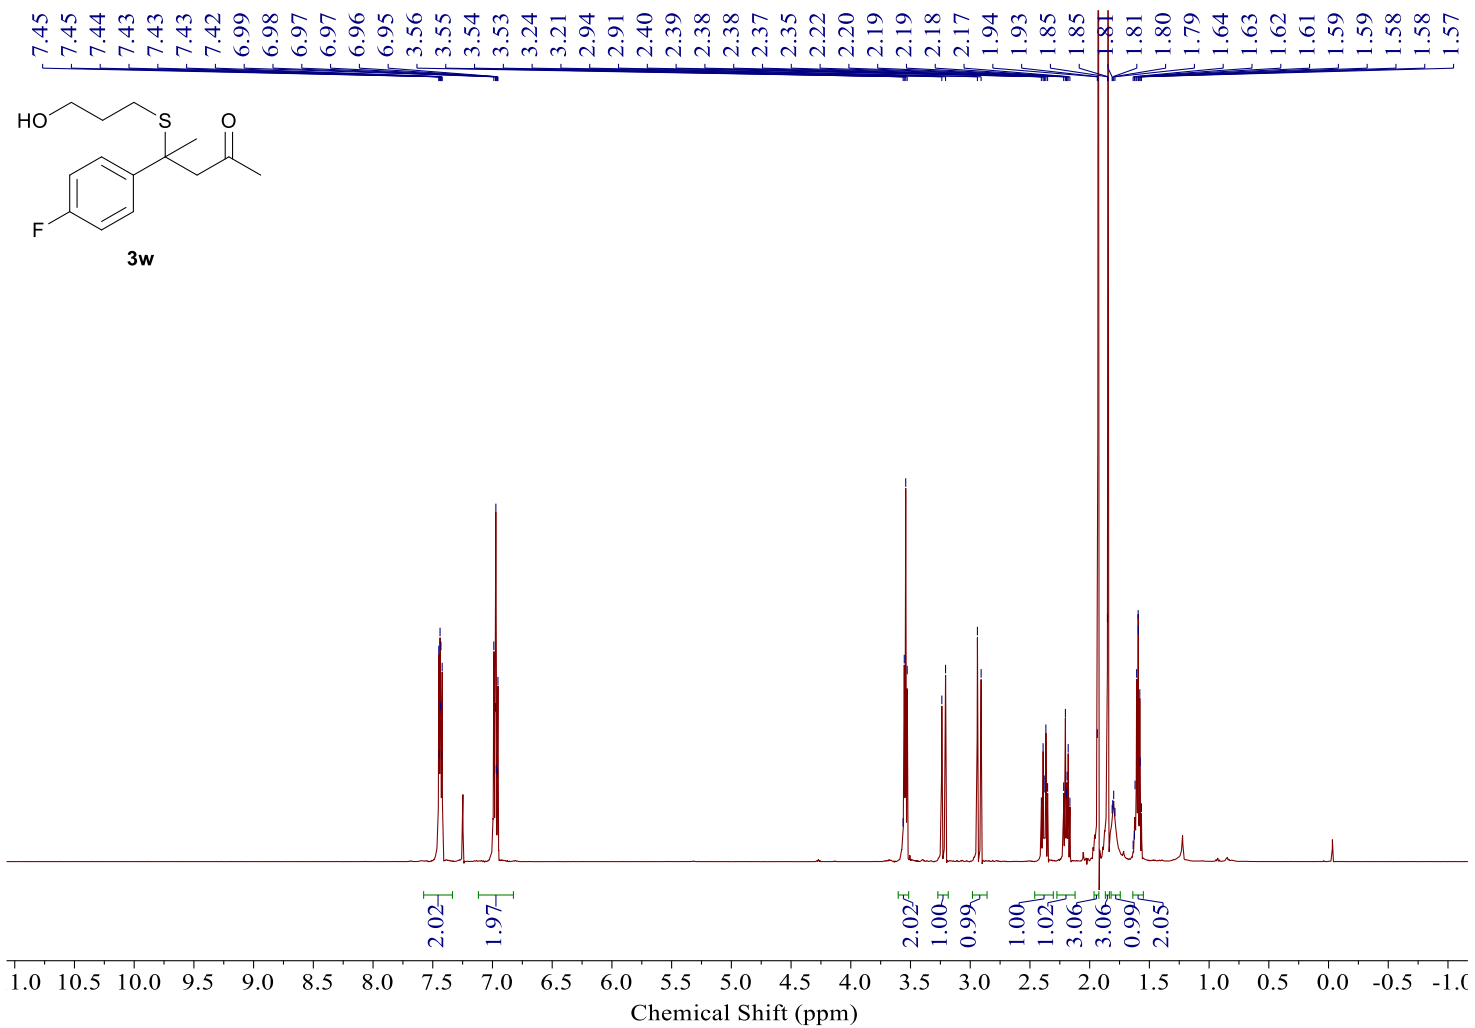

<sup>13</sup>C NMR of compound **3w**

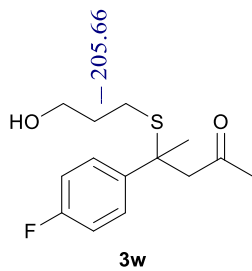

162.43  
160.47

139.90  
139.87

128.58  
128.51

115.18  
115.01

61.62  
55.20  
55.14  
48.80

31.88  
31.54  
26.22  
25.42

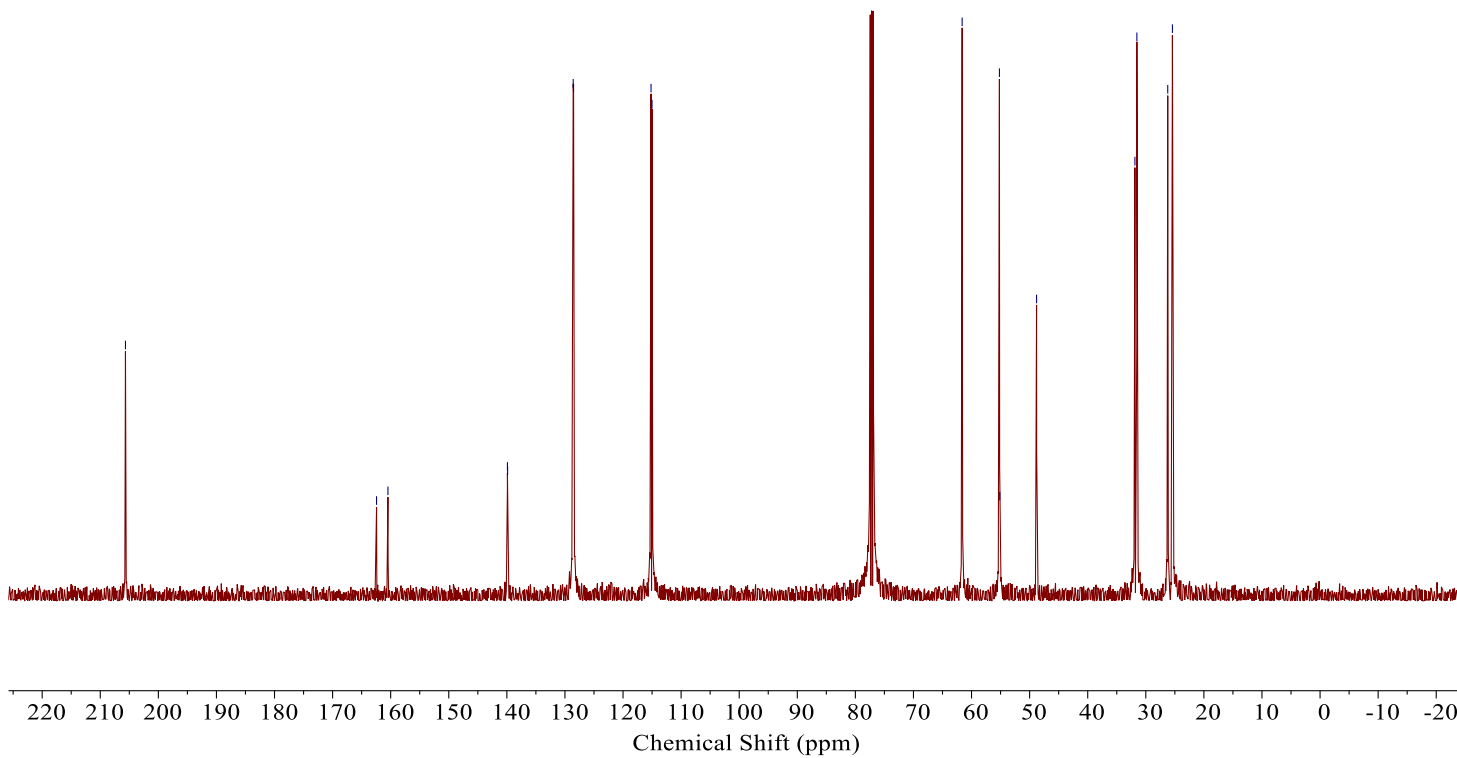

$^{19}\text{F}$  NMR of compound **3w**

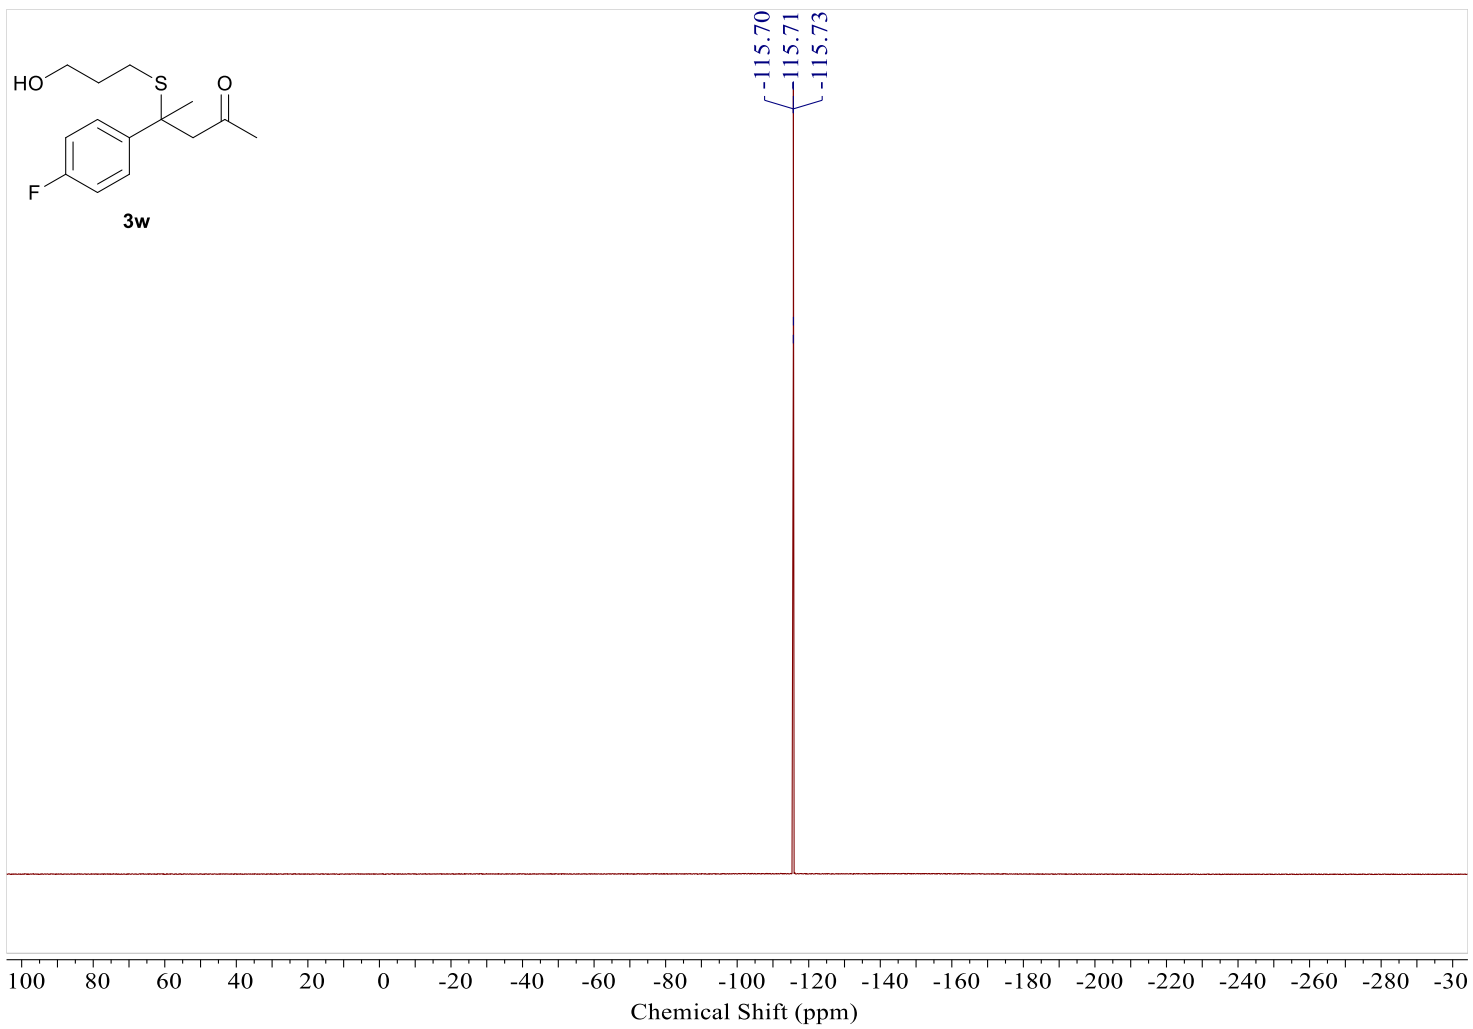

<sup>1</sup>H NMR of compound **3x**

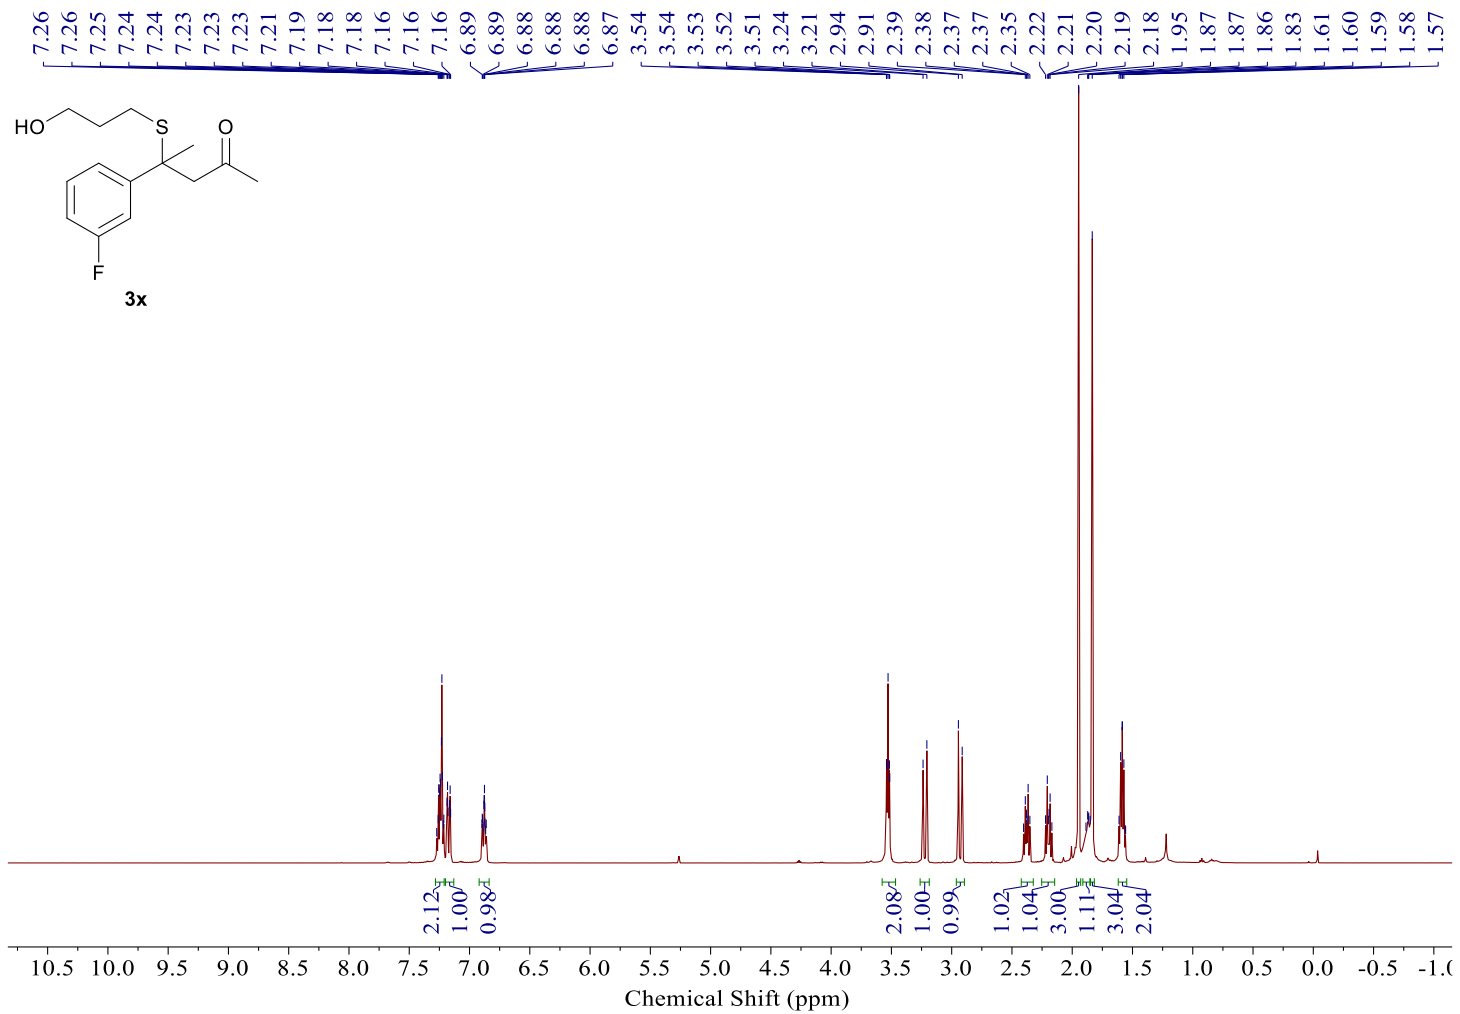

<sup>13</sup>C NMR of compound **3x**

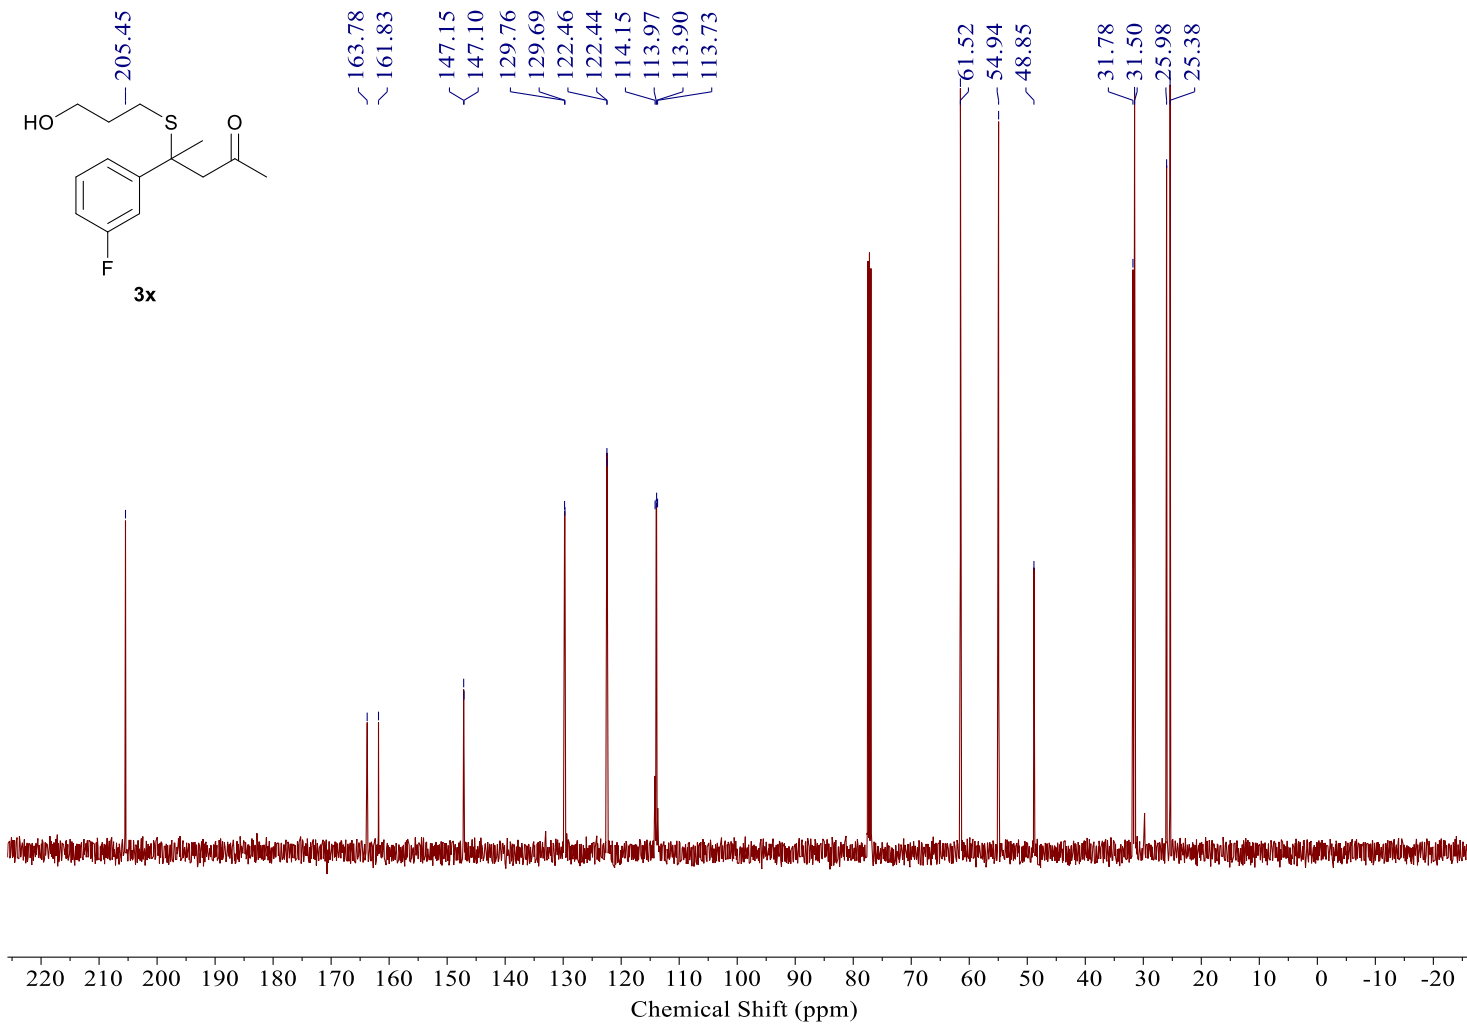

<sup>19</sup>F NMR of compound **3x**

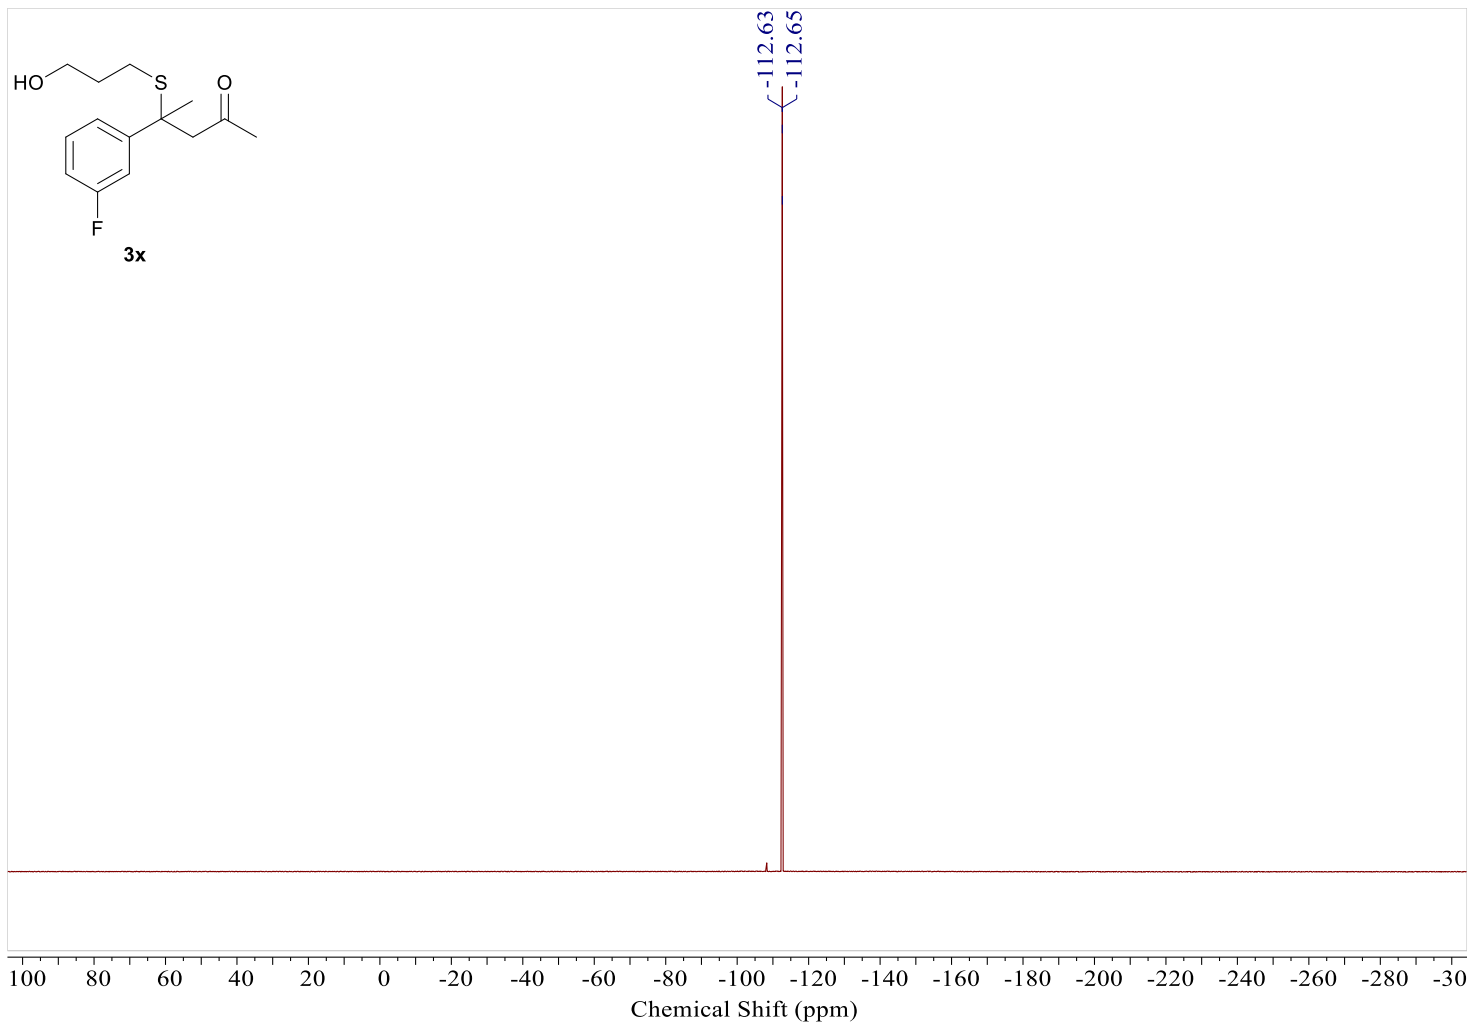

<sup>1</sup>H NMR of compound **3y**

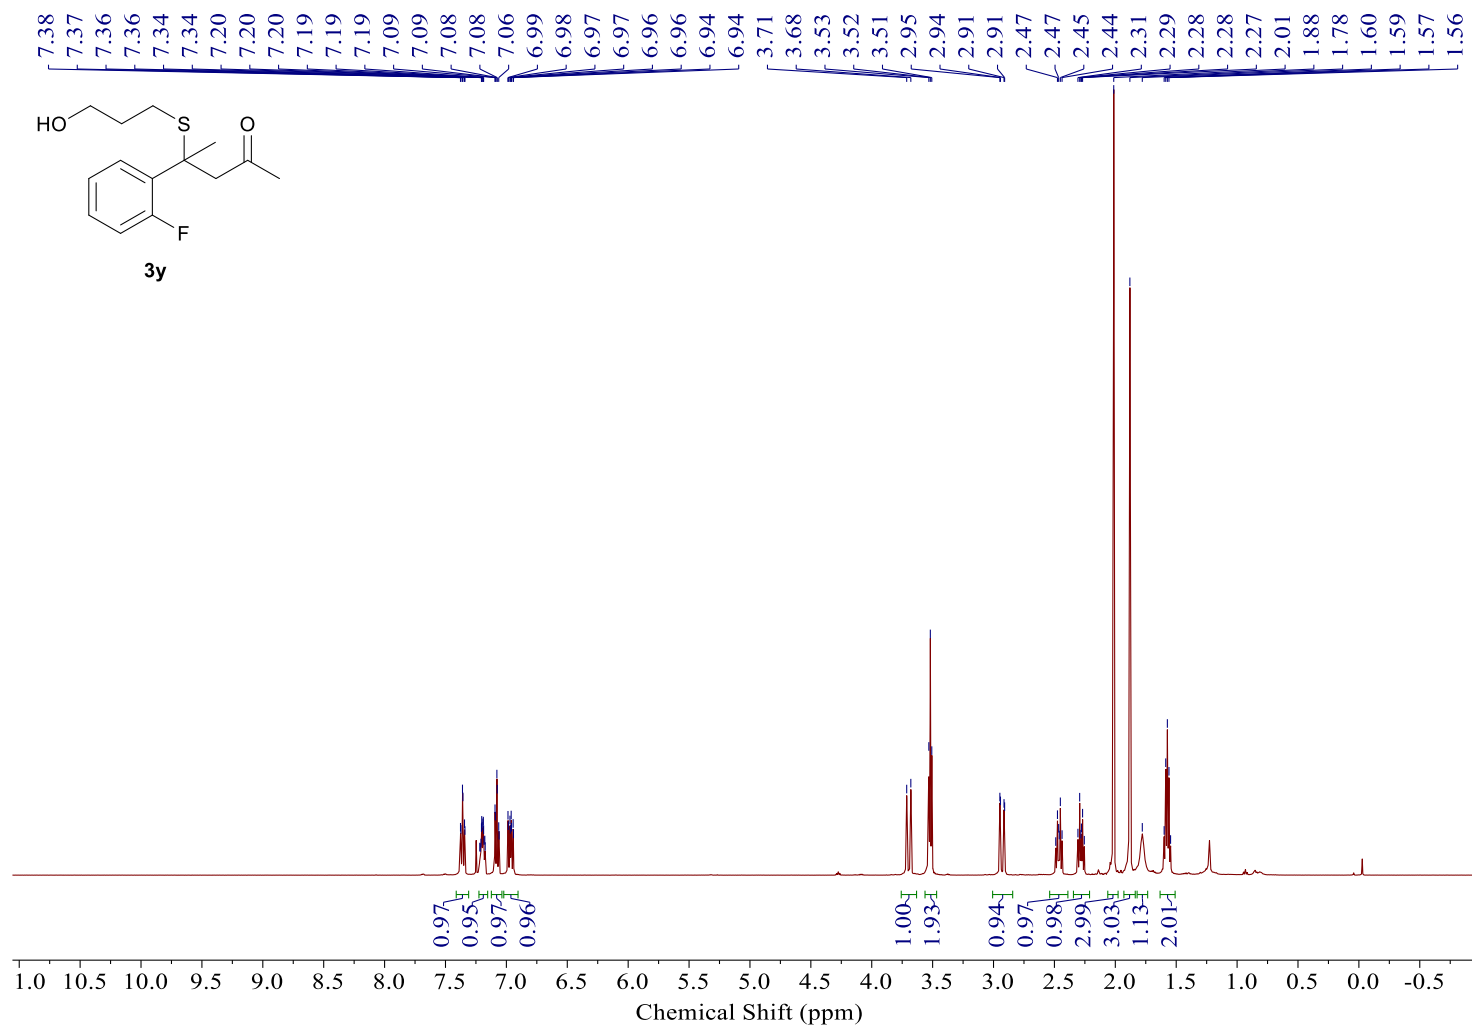

<sup>13</sup>C NMR of compound **3y**

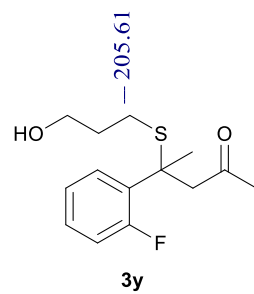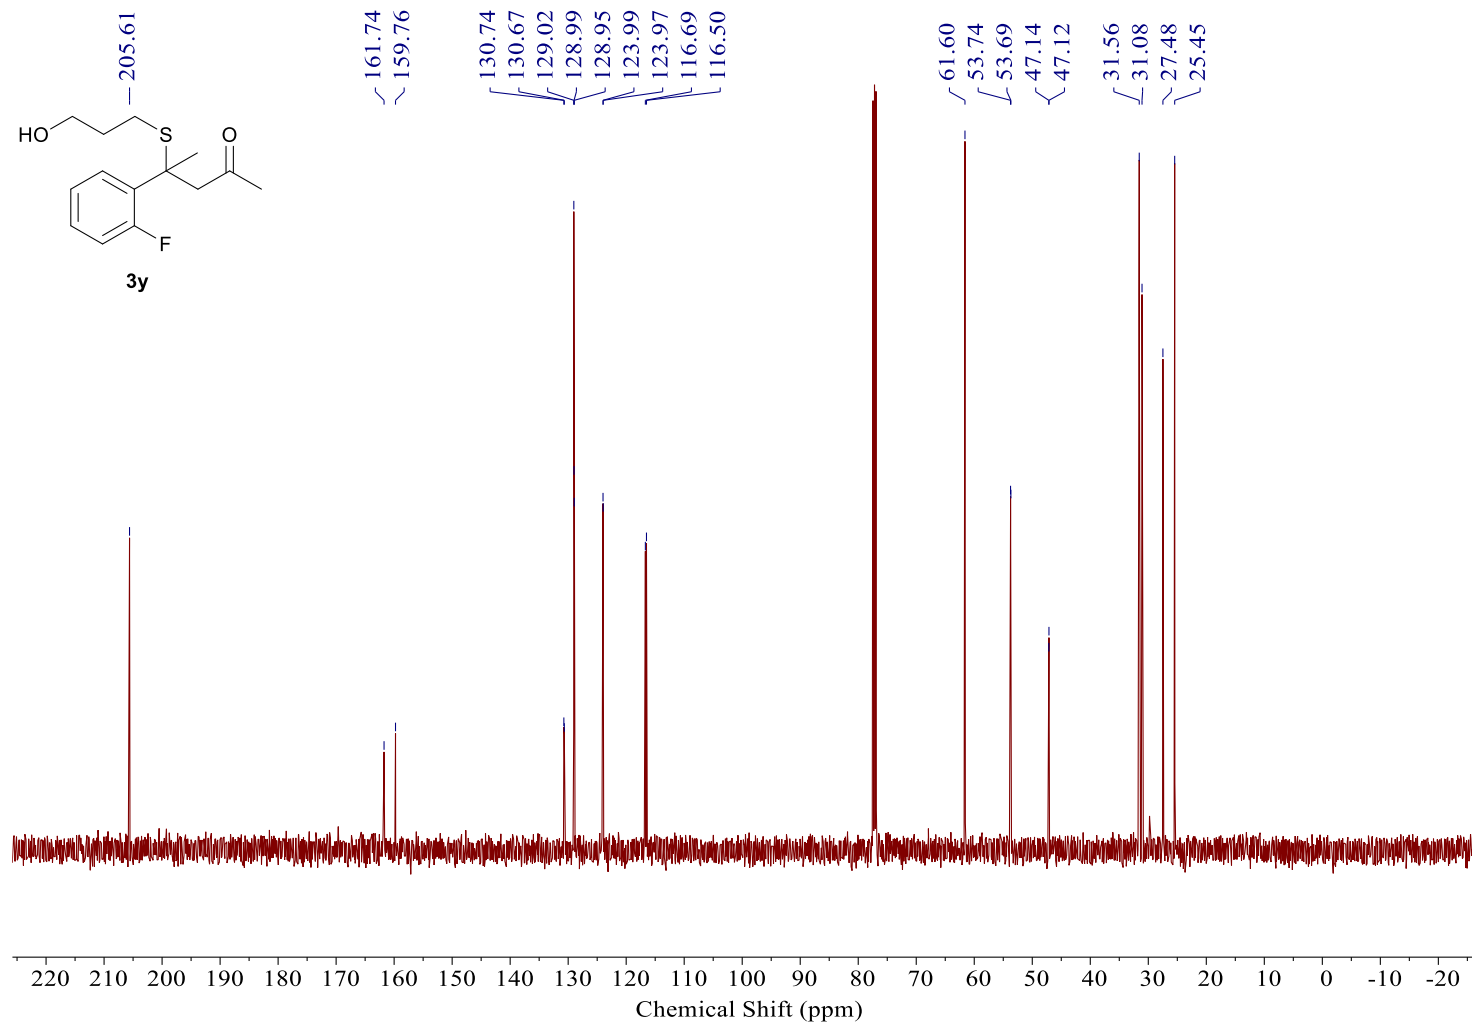



$^{19}\text{F}$  NMR of compound **3y**

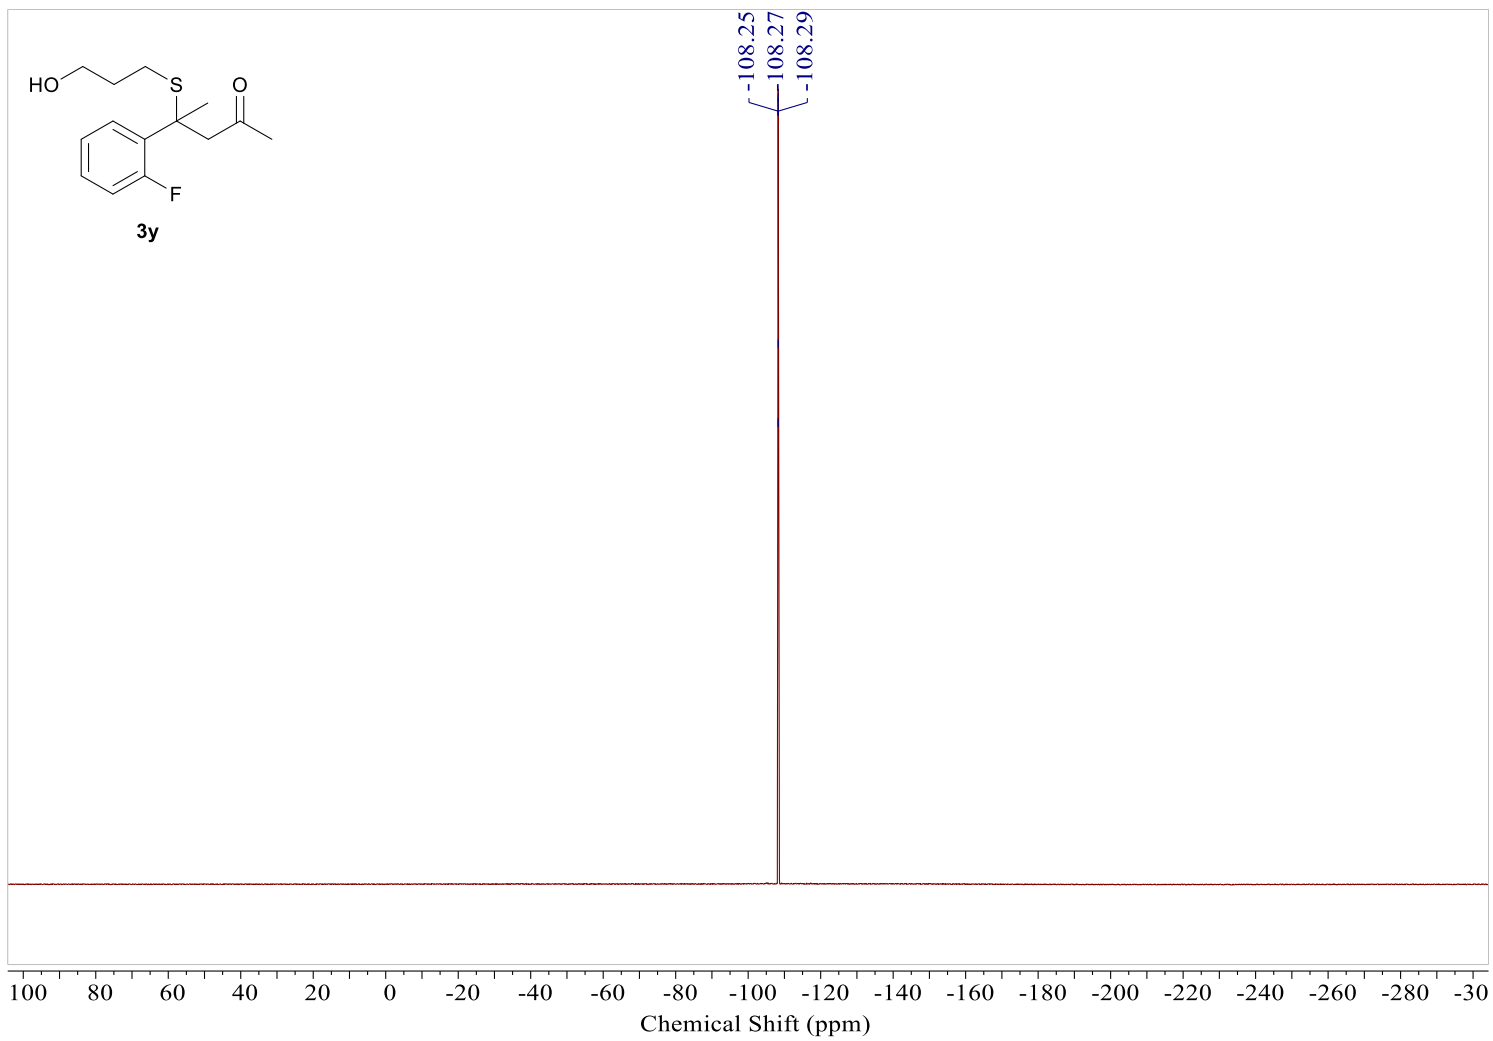

<sup>1</sup>H NMR of compound **3z**

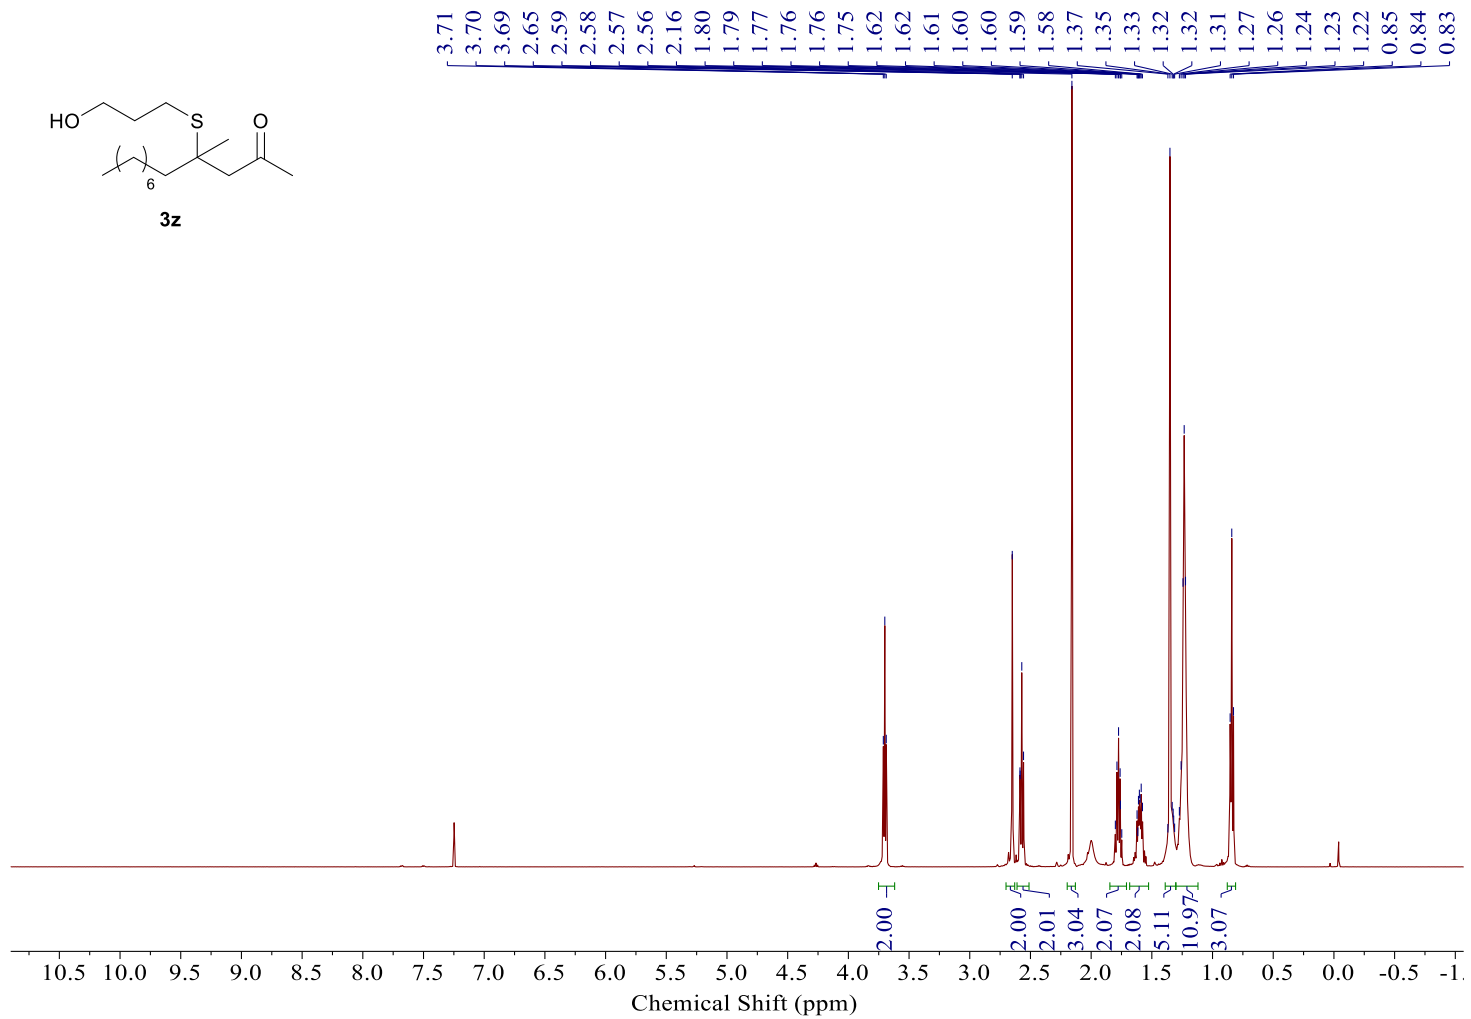

<sup>13</sup>C NMR of compound **3z**

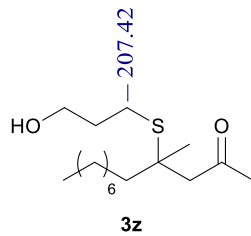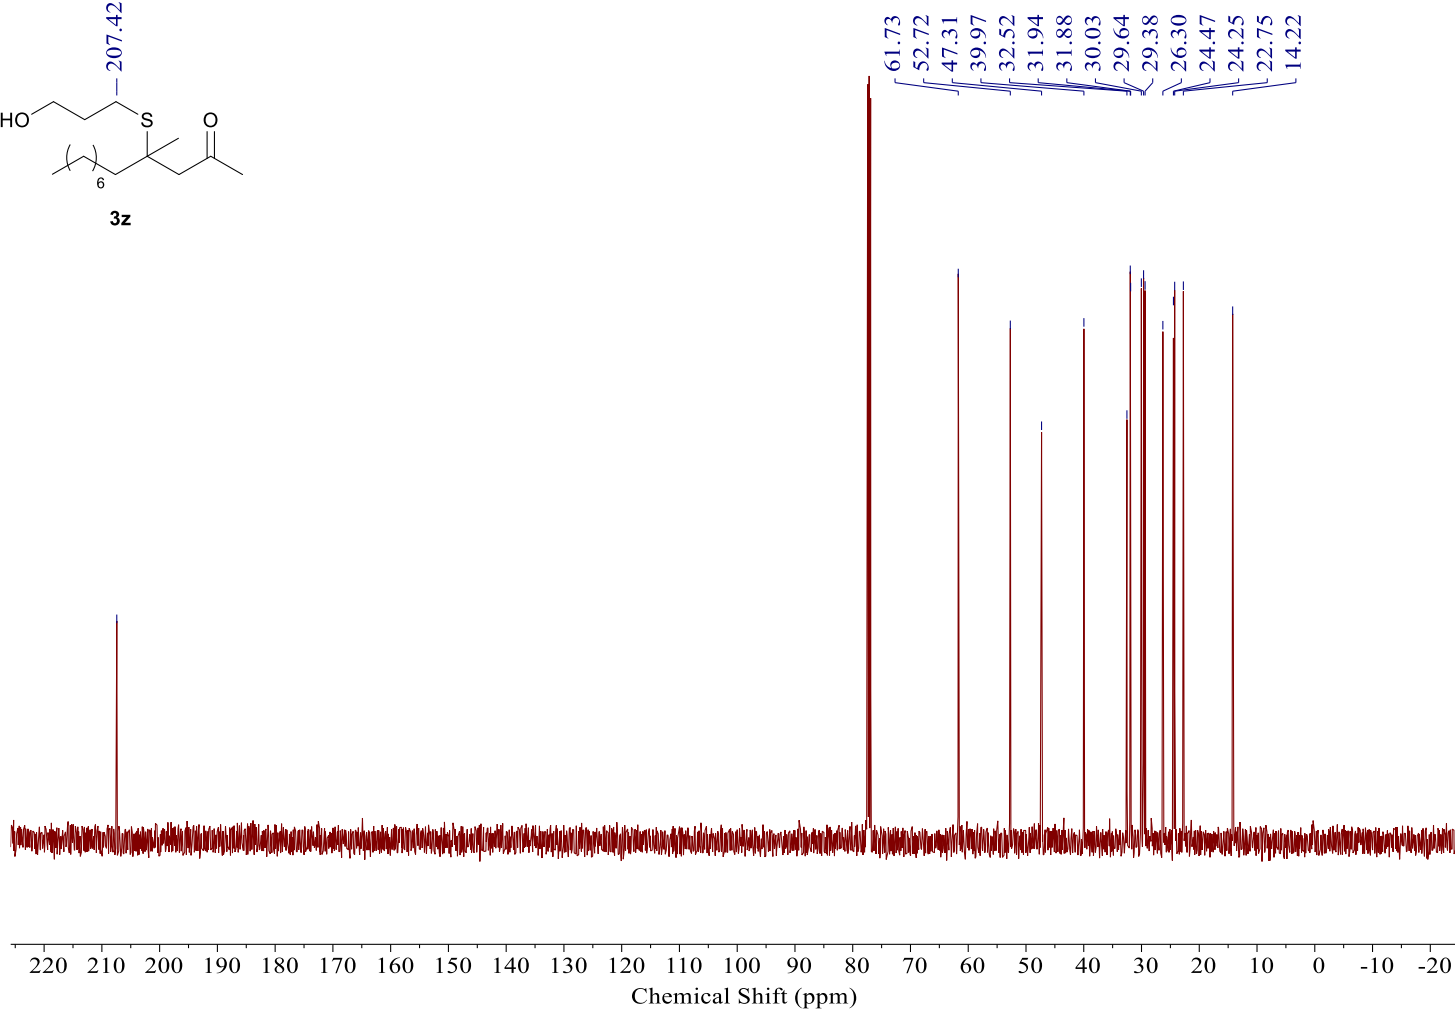

<sup>1</sup>H NMR of compound **3za**

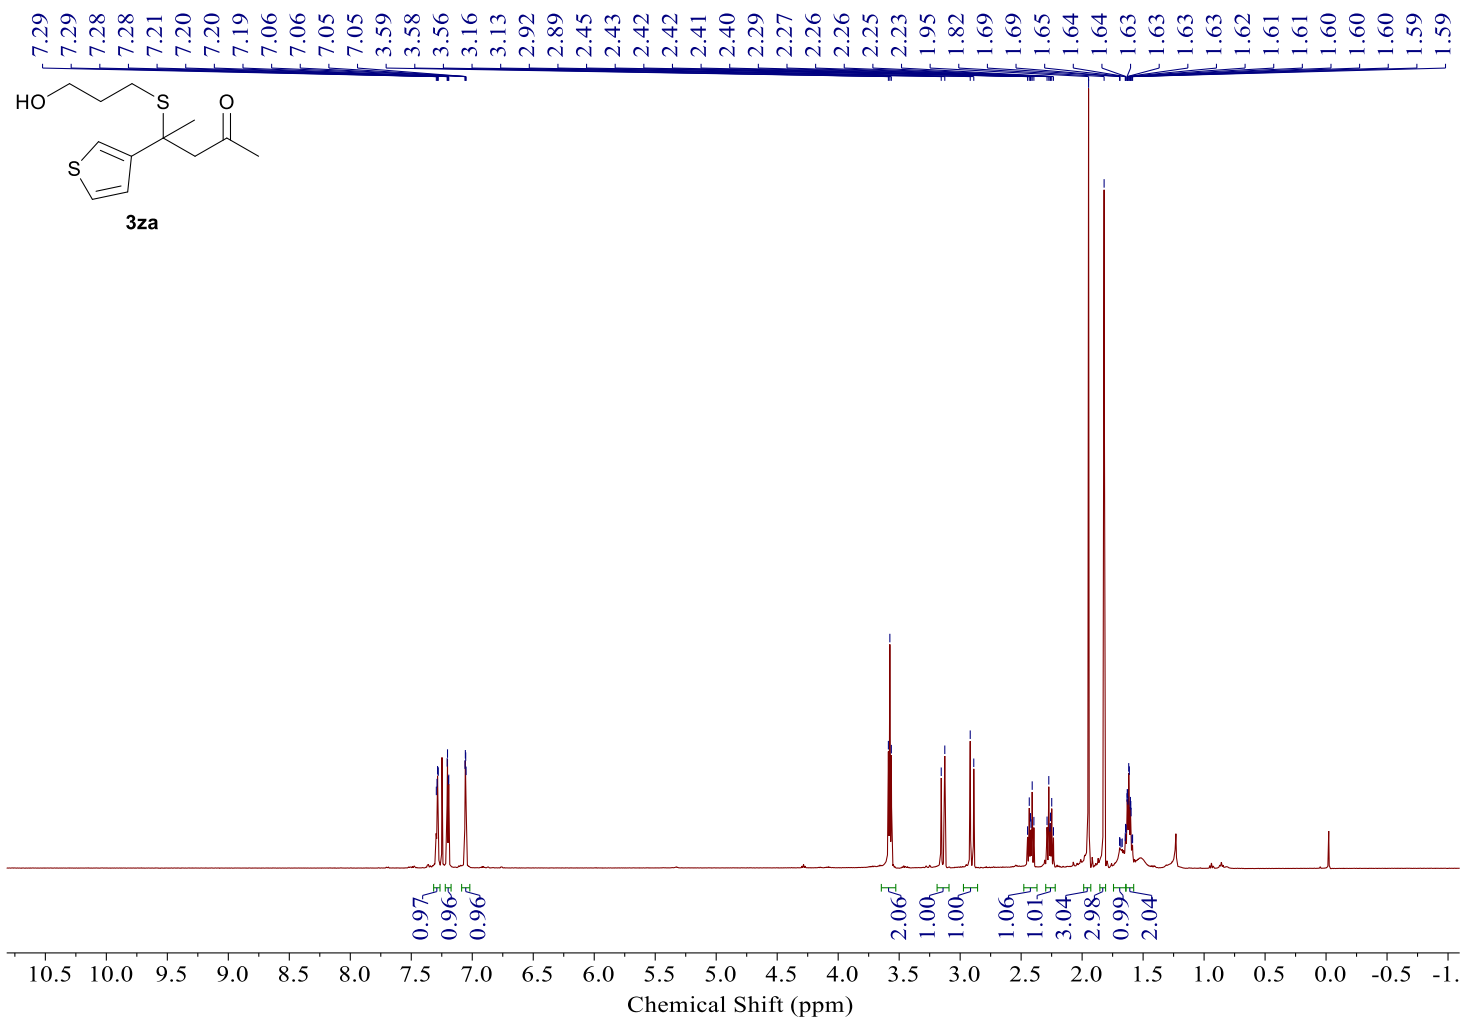

<sup>13</sup>C NMR of compound **3za**

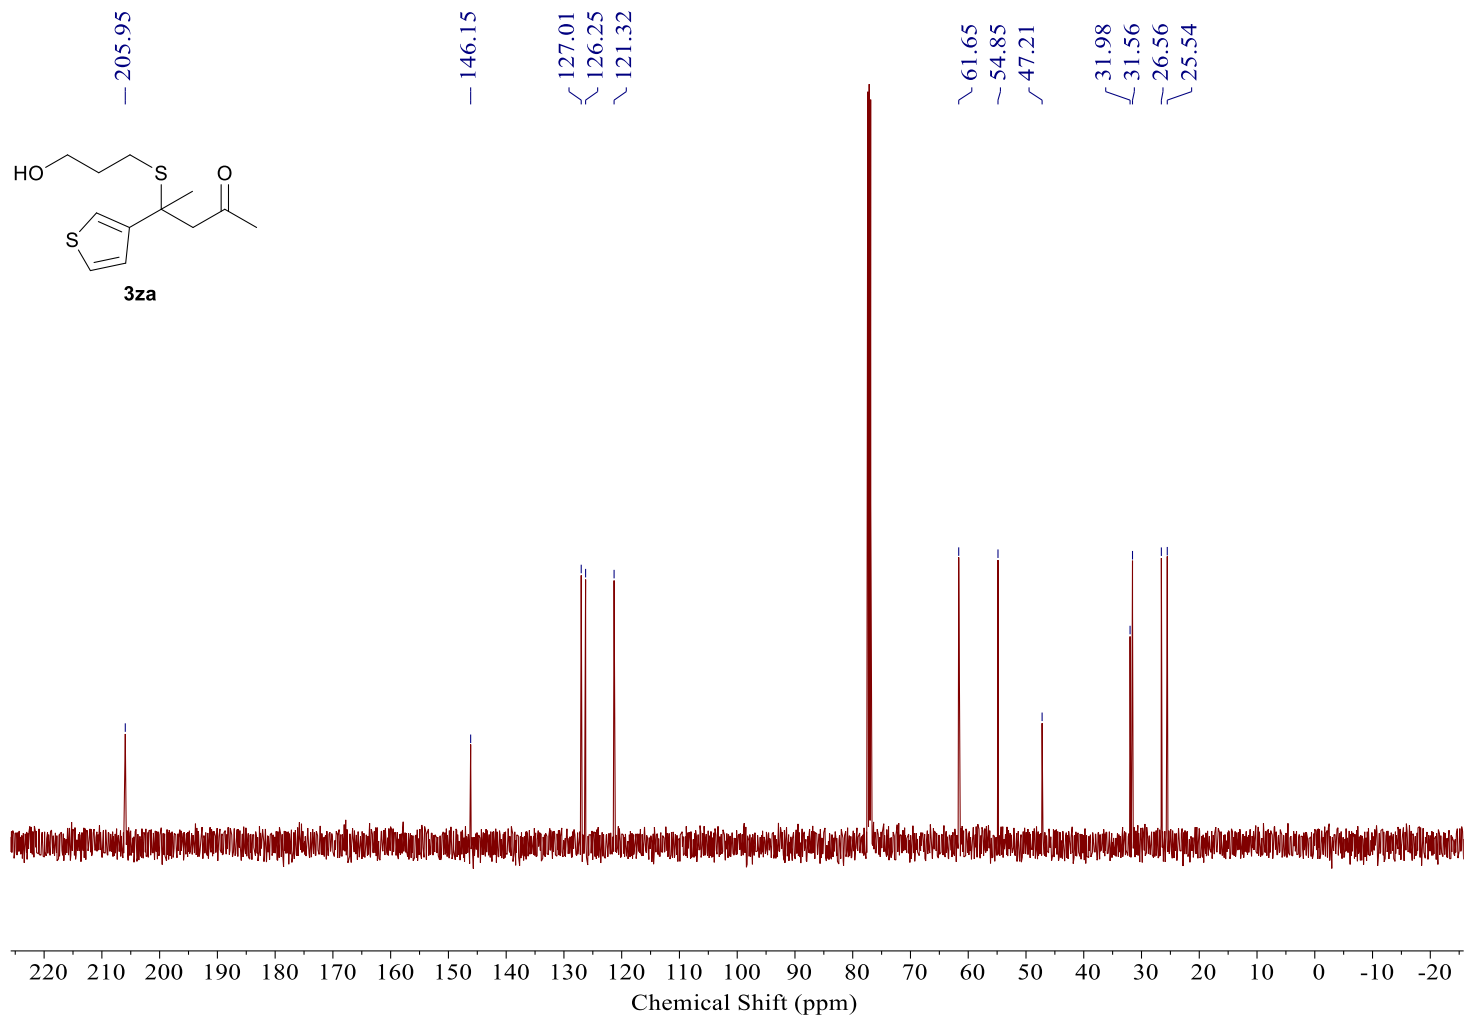

<sup>1</sup>H NMR of compound **3zb**

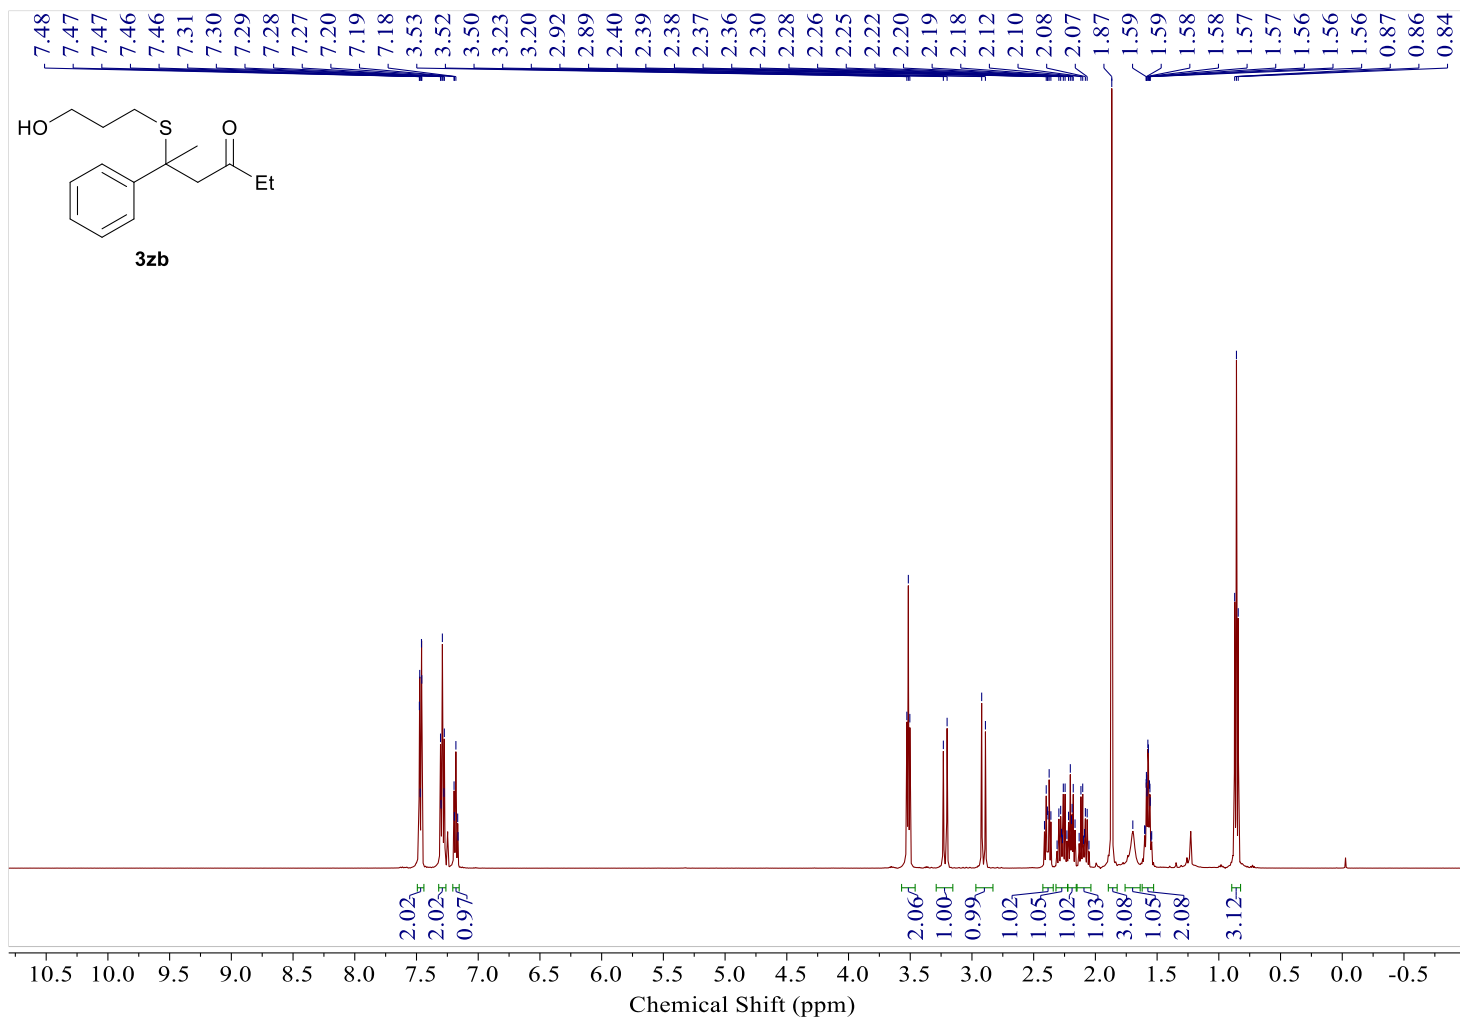

<sup>13</sup>C NMR of compound **3zb**

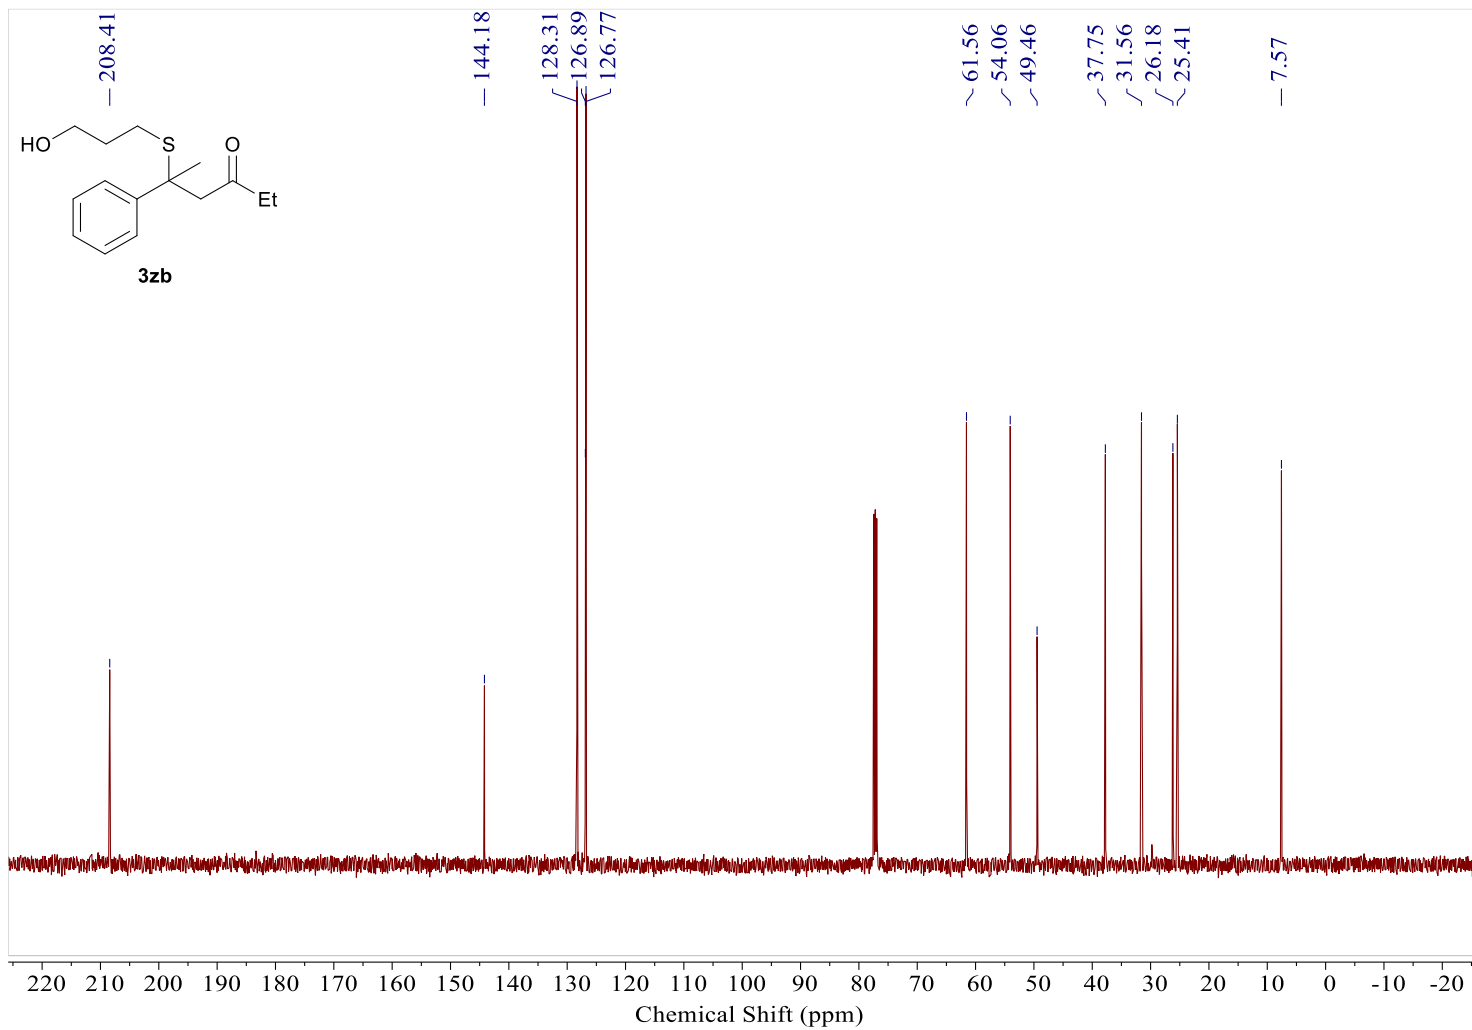

<sup>1</sup>H NMR of compound **3zc**

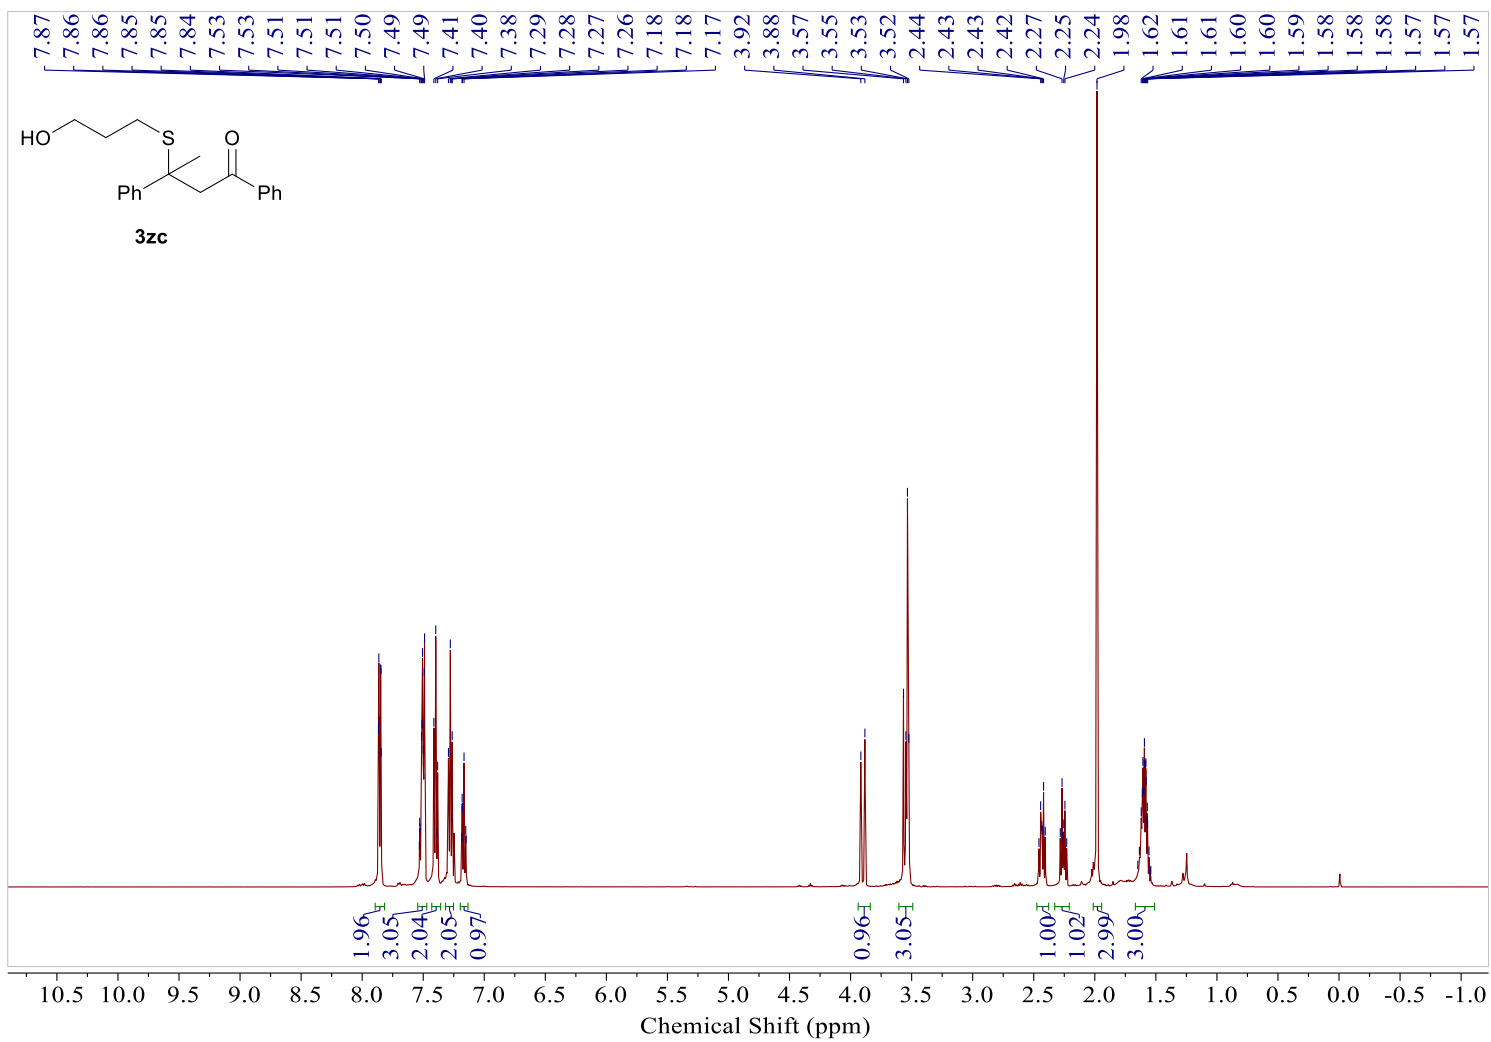



<sup>13</sup>C NMR of compound **3zc**

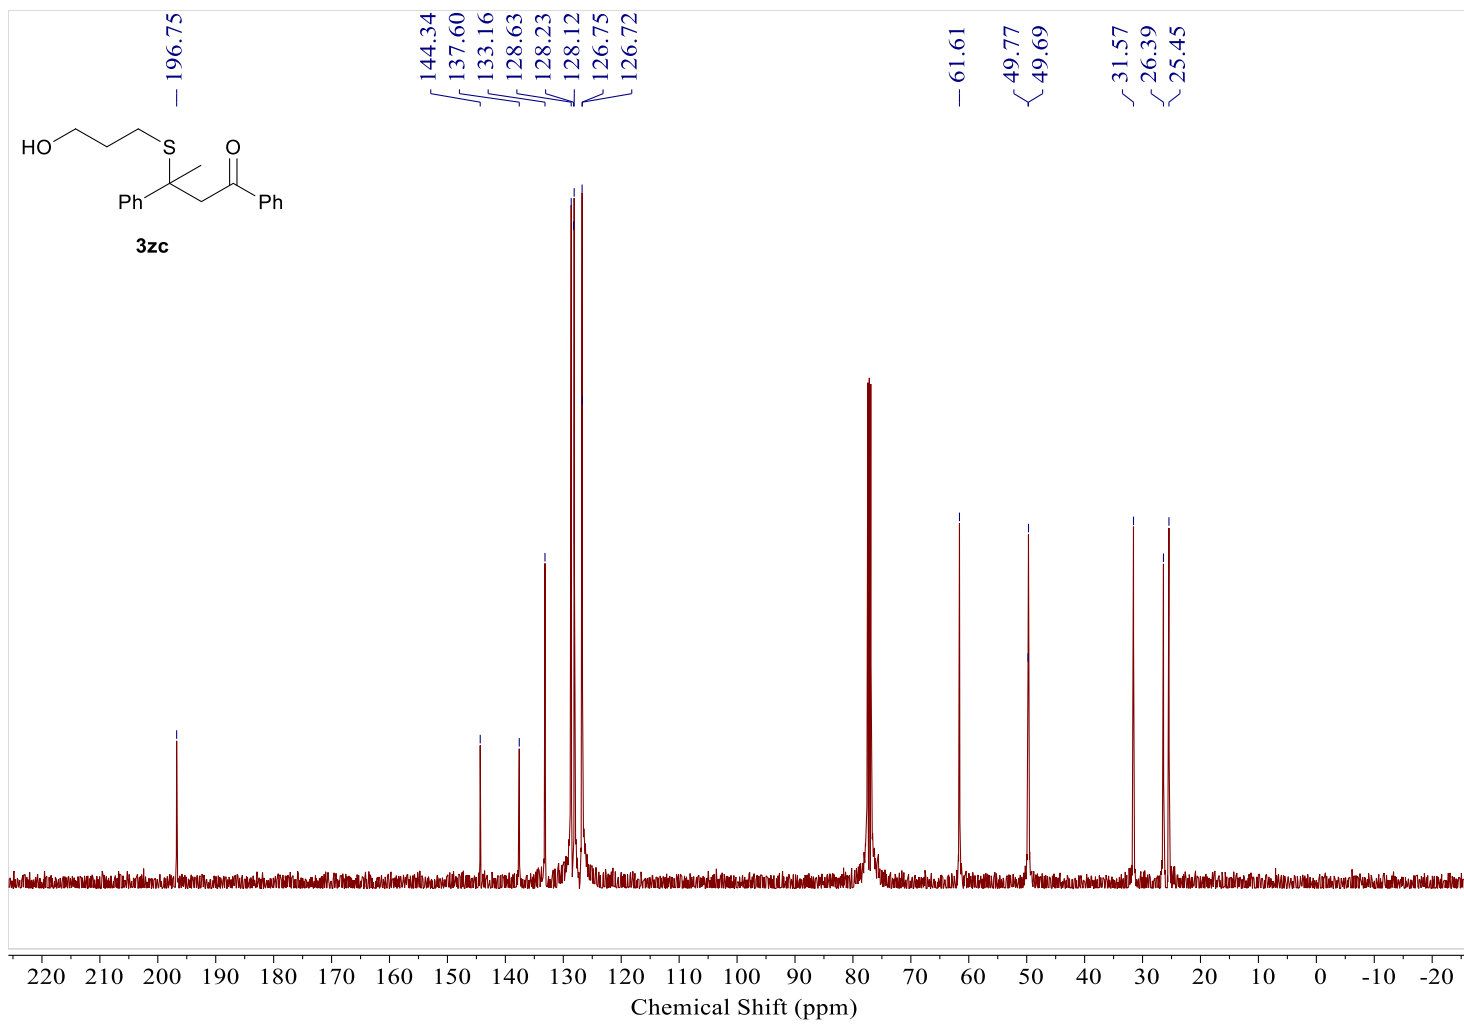

<sup>1</sup>H NMR of compound **3zd**

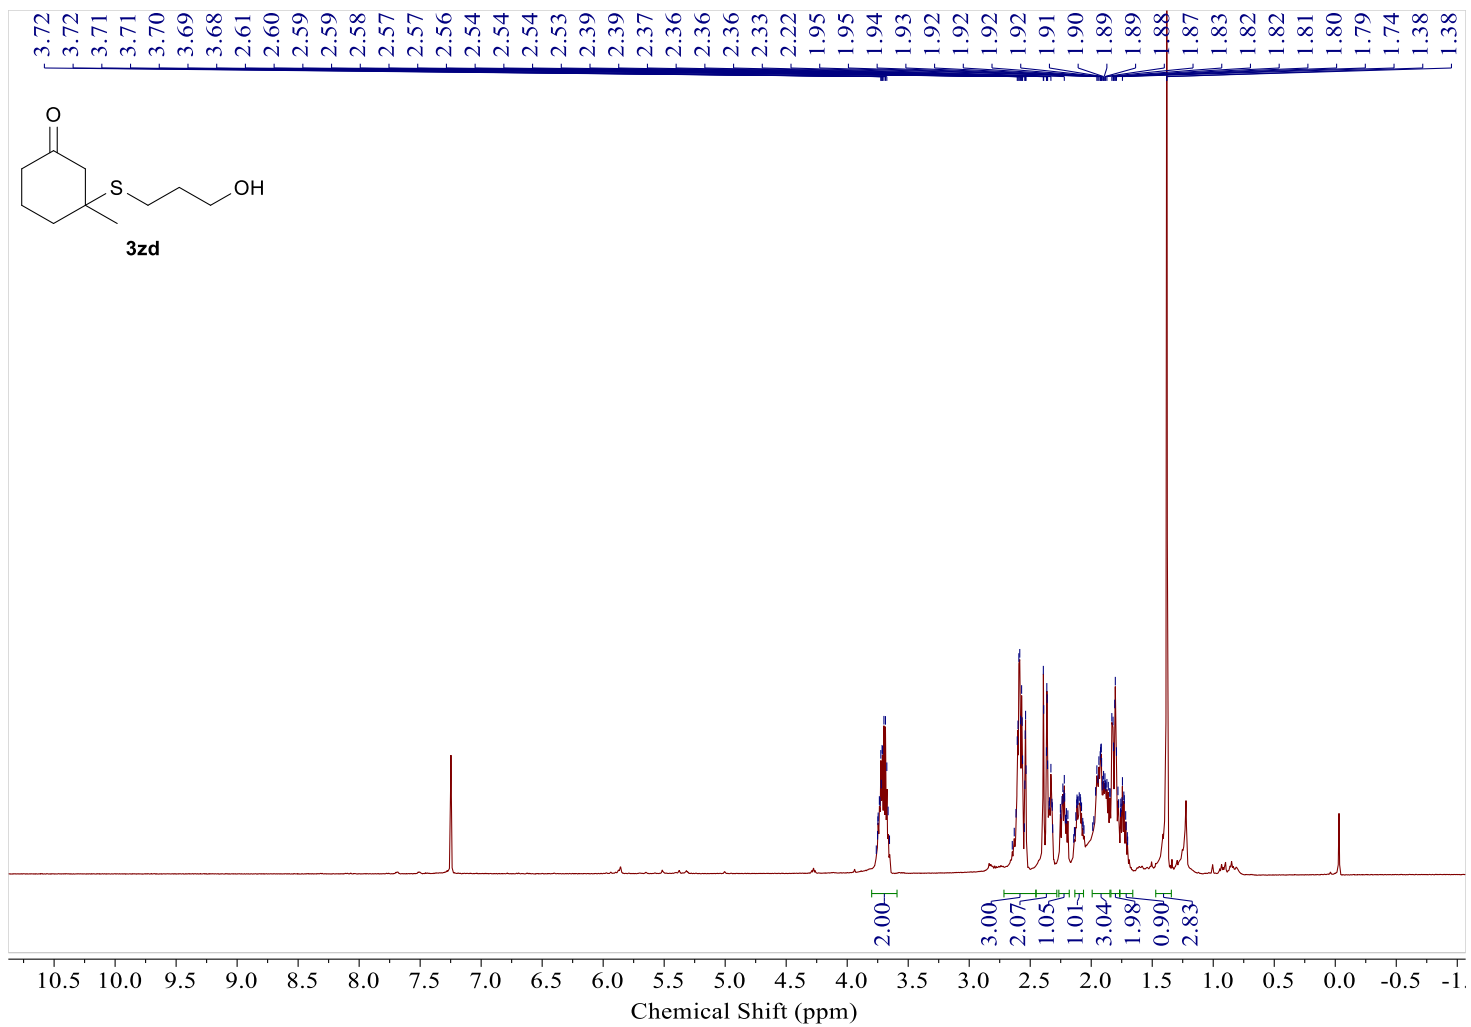

<sup>13</sup>C NMR of compound **3zd**

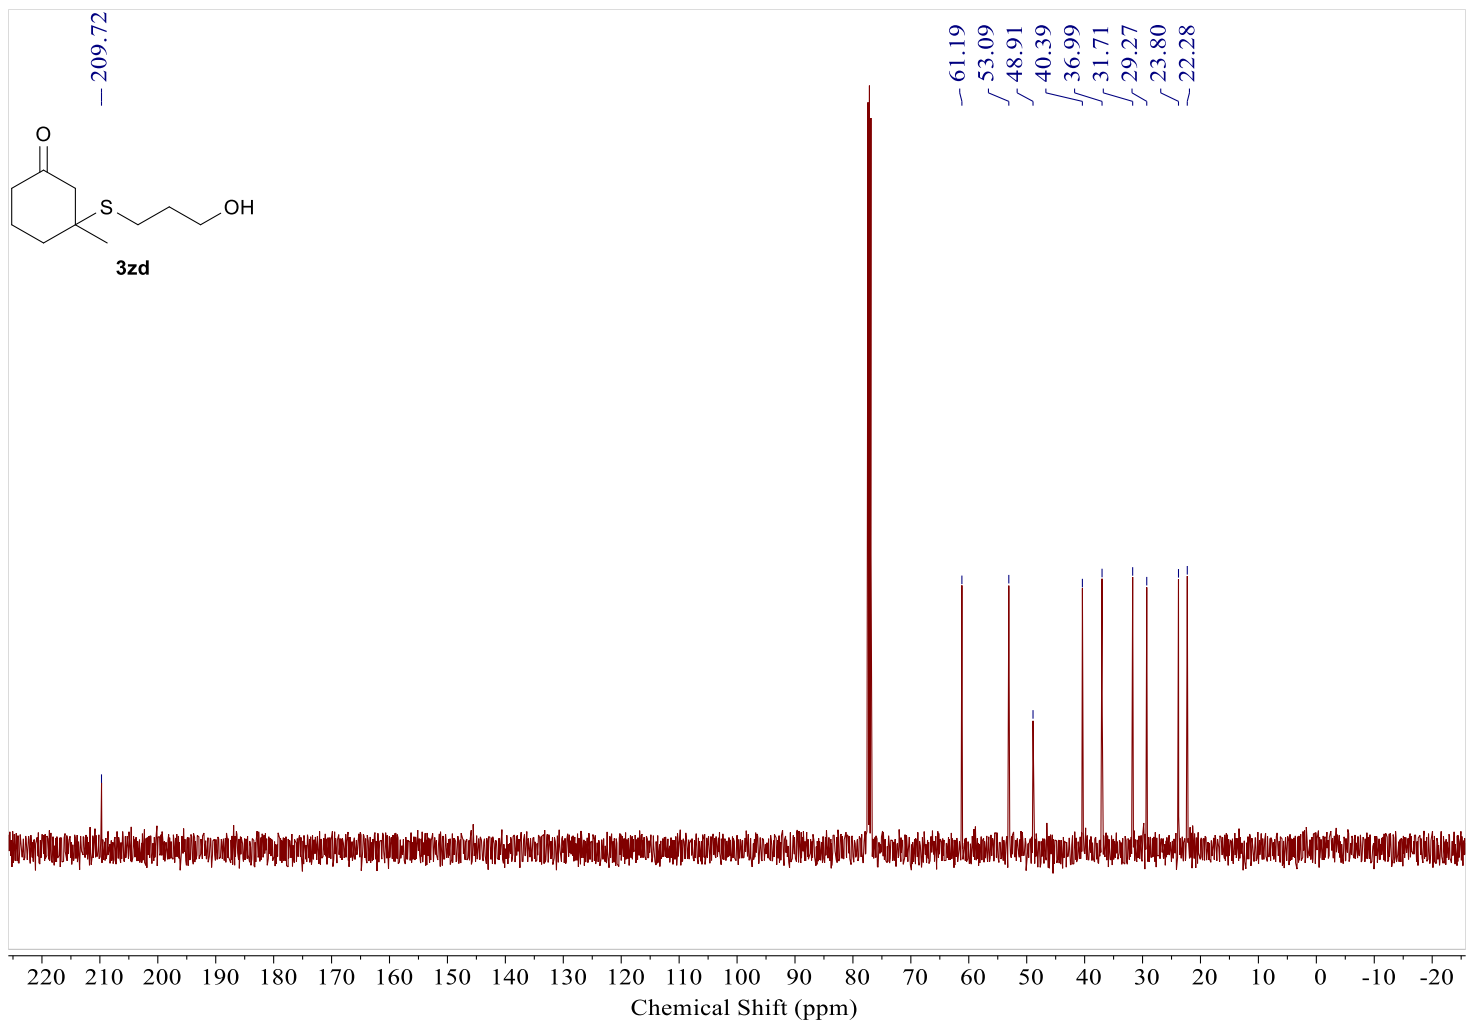

<sup>1</sup>H NMR of compound **3ze**

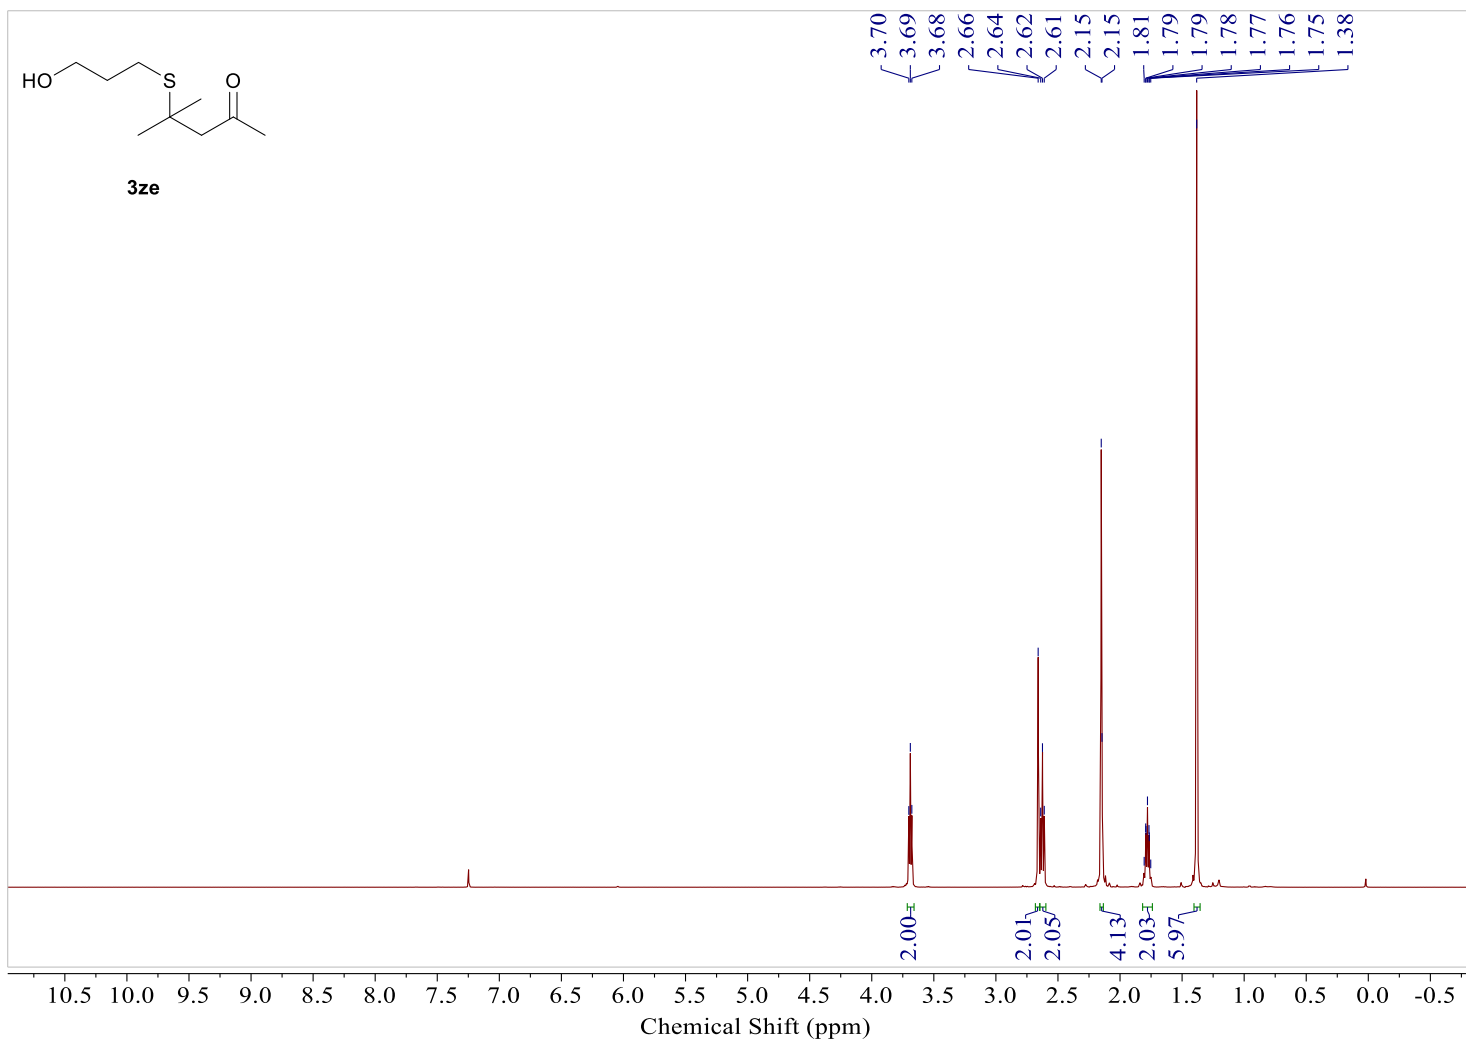

<sup>13</sup>C NMR of compound **3ze**

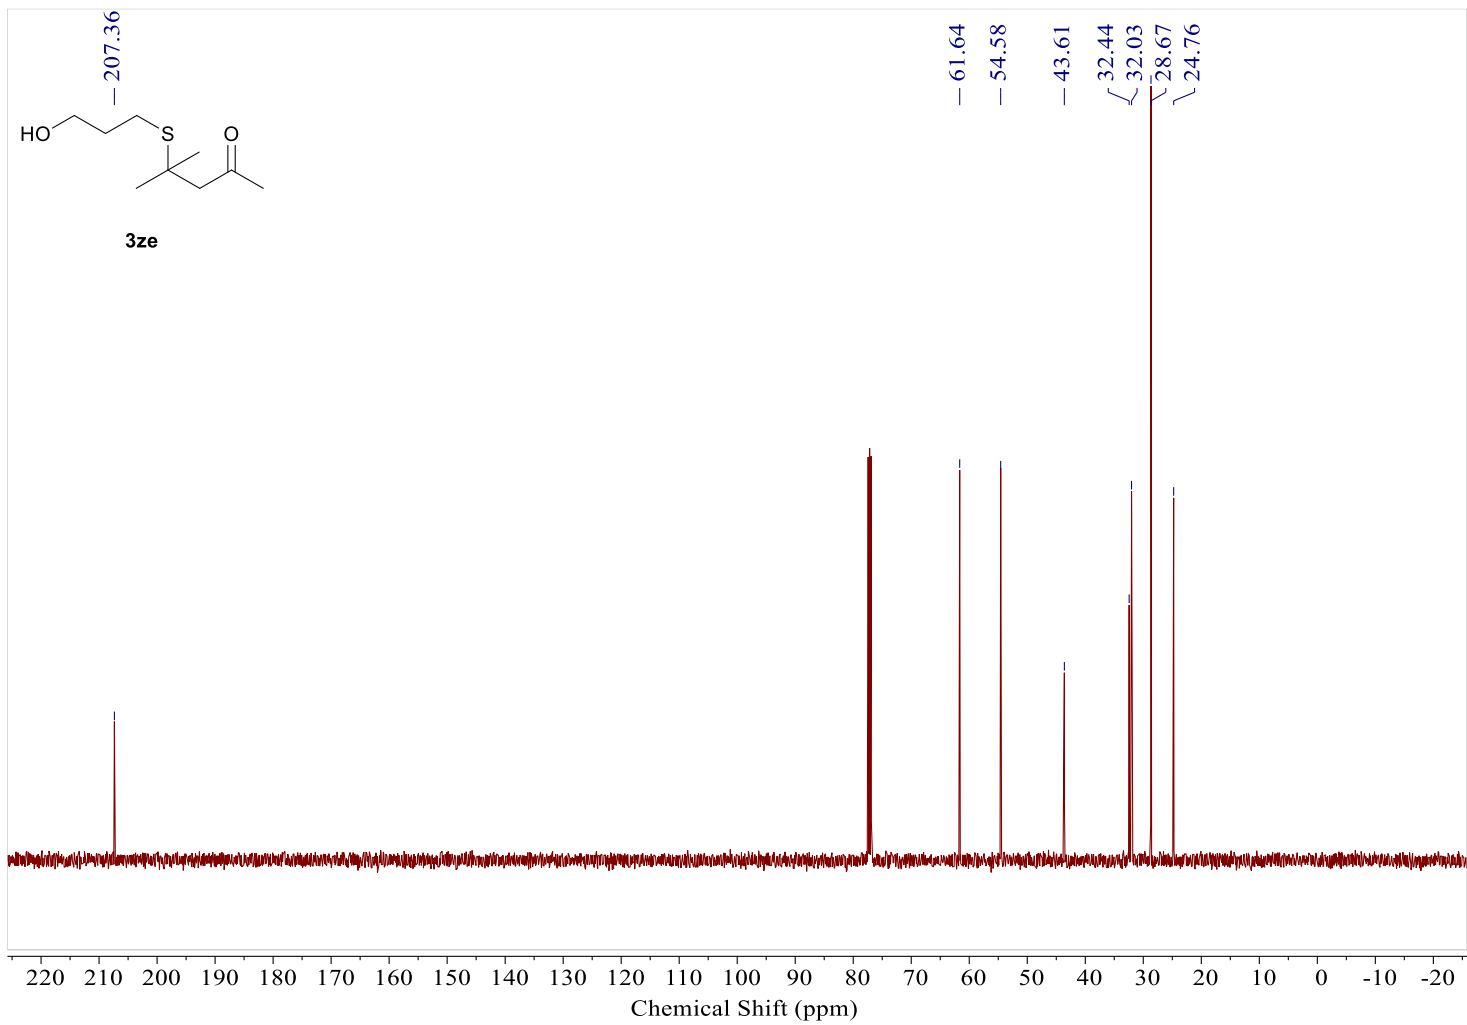

Supplement: d3ob00911d1.pdf [file d3ob00911d1.pdf]
